# Supplementary material
Source: publisher site journal article supplement (https://www.dovepress.com/article/249156)
Supplement: Supplementary file 1 [file get_supplementary_file.php]

**Virtual screening and optimization of novel mTOR inhibitors for radiosensitization of hepatocellular carcinoma**

**Supplementary Materials**

**Contents**

[Figure S1 1](#_Toc36994986)

[Figure S2 2](#_Toc36994987)

[Figure S3 2](#_Toc36994988)

[MD simulations 3](#_Toc36994989)

[Western blot assays 6](#_Toc36994990)

[Figure S8 7](#_Toc36994991)

[1H-NMR spectra of compound 1a 9](#_Toc36994992)

[13C-NMR spectra of compound 1a 10](#_Toc36994993)

[MS spectra of compound 1a 10](#_Toc36994994)

[1H-NMR spectra of compound 1b 11](#_Toc36994995)

[13C-NMR spectra of compound 1b 12](#_Toc36994996)

[MS spectra of compound 1b 12](#_Toc36994997)

[1H-NMR spectra of compound 1c 12](#_Toc36994998)

[13C-NMR spectra of compound 1c 13](#_Toc36994999)

[MS spectra of compound 1c 13](#_Toc36995000)

[1H-NMR spectra of compound 1d 14](#_Toc36995001)

[13C-NMR spectra of compound 1d 14](#_Toc36995002)

[MS spectra of compound 1d 15](#_Toc36995003)

[1H-NMR spectra of compound 2a 15](#_Toc36995004)

[13C-NMR spectra of compound 2a 16](#_Toc36995005)

[MS spectra of compound 2a 17](#_Toc36995006)

[1H-NMR spectra of compound 2b 17](#_Toc36995007)

[13C-NMR spectra of compound 2b 18](#_Toc36995008)

[MS spectra of compound 2b 19](#_Toc36995009)

[1H-NMR spectra of compound 2c 19](#_Toc36995010)

[13C-NMR spectra of compound 2c 20](#_Toc36995011)

[MS spectra of compound 2c 20](#_Toc36995012)

[1H-NMR spectra of compound 2d 21](#_Toc36995013)

[13C-NMR spectra of compound 2d 22](#_Toc36995014)

[MS spectra of compound 2d 22](#_Toc36995015)

[1H-NMR spectra of compound 2e 23](#_Toc36995016)

[13C-NMR spectra of compound 2e 23](#_Toc36995017)

[MS spectra of compound 2e 24](#_Toc36995018)

[1H-NMR spectra of compound 2f 25](#_Toc36995019)

[13C-NMR spectra of compound 2f 25](#_Toc36995020)

[MS spectra of compound 2f 26](#_Toc36995021)

[1H-NMR spectra of compound 2g 27](#_Toc36995022)

[13C-NMR spectra of compound 2g 27](#_Toc36995023)

[MS spectra of compound 2g 28](#_Toc36995024)

[1H-NMR spectra of compound 2h 28](#_Toc36995025)

[13C-NMR spectra of compound 2h 29](#_Toc36995026)

[MS spectra of compound 2h 29](#_Toc36995027)

[1H-NMR spectra of compound 2i 30](#_Toc36995028)

[13C-NMR spectra of compound 2i 31](#_Toc36995029)

[MS spectra of compound 2i 31](#_Toc36995030)

[1H-NMR spectra of compound 2j 32](#_Toc36995031)

[13C-NMR spectra of compound 2j 32](#_Toc36995032)

[MS spectra of compound 2j 33](#_Toc36995033)

[1H-NMR spectra of compound 3a 34](#_Toc36995034)

[13C-NMR spectra of compound 3a 34](#_Toc36995035)

[MS spectra of compound 3a 35](#_Toc36995036)

[1H-NMR spectra of compound 3b 35](#_Toc36995037)

[13C-NMR spectra of compound 3b 36](#_Toc36995038)

[MS spectra of compound 3b 36](#_Toc36995039)

[1H-NMR spectra of compound 3c 37](#_Toc36995040)

[13C-NMR spectra of compound 3c 38](#_Toc36995041)

[MS spectra of compound 3c 38](#_Toc36995042)

[1H-NMR spectra of compound 3d 39](#_Toc36995043)

[13C-NMR spectra of compound 3d 40](#_Toc36995044)

[MS spectra of compound 3d 40](#_Toc36995045)

[1H-NMR spectra of compound 3e 41](#_Toc36995046)

[13C-NMR spectra of compound 3e 41](#_Toc36995047)

[MS spectra of compound 3e 42](#_Toc36995048)

[1H-NMR spectra of compound 3f 43](#_Toc36995049)

[13C-NMR spectra of compound 3f 43](#_Toc36995050)

[MS spectra of compound 3f 44](#_Toc36995051)

[1H-NMR spectra of compound 3g 44](#_Toc36995052)

[13C-NMR spectra of compound 3g 45](#_Toc36995053)

[MS spectra of compound 3g 45](#_Toc36995054)

[1H-NMR spectra of compound 3h 46](#_Toc36995055)

[13C-NMR spectra of compound 3h 47](#_Toc36995056)

[MS spectra of compound 3h 47](#_Toc36995057)


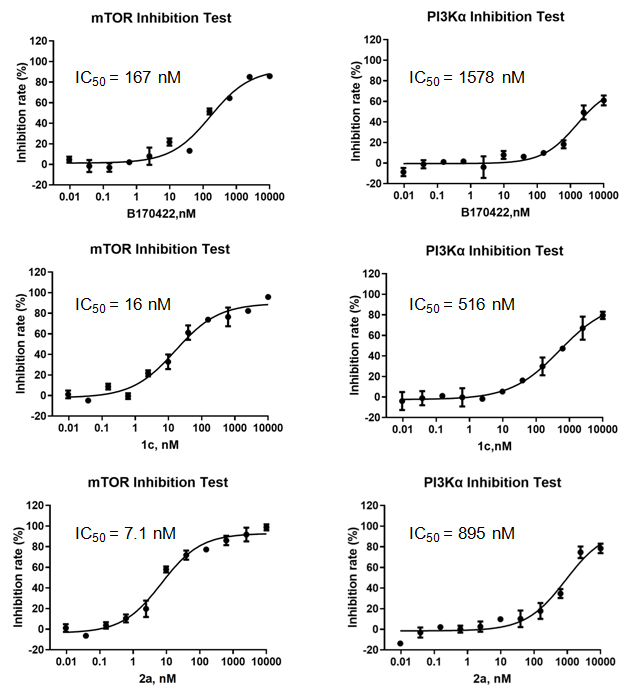


Figure S1 Enzyme inhibitory activities of **B170422**, **1c** and **2a** against mTOR and PI3Kα.


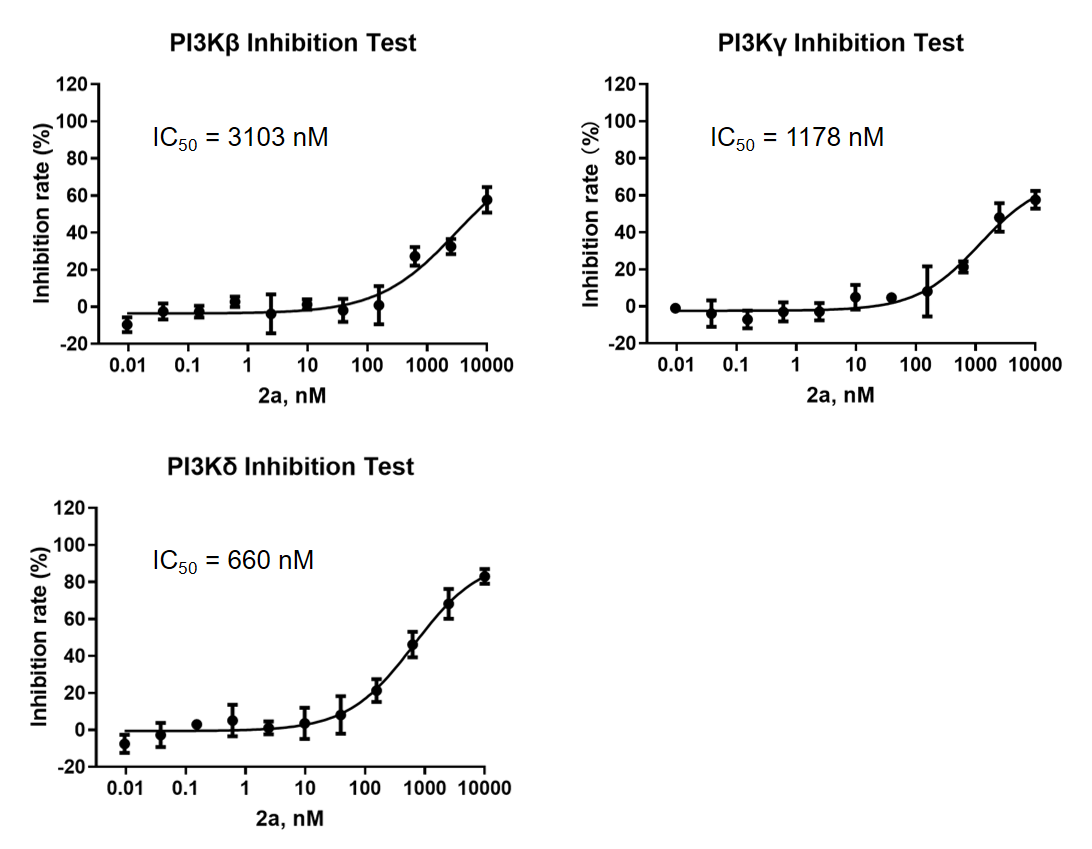


Figure S2 Enzyme inhibitory activities of **2a** against PI3Kβ, PI3Kγ and PI3Kδ.


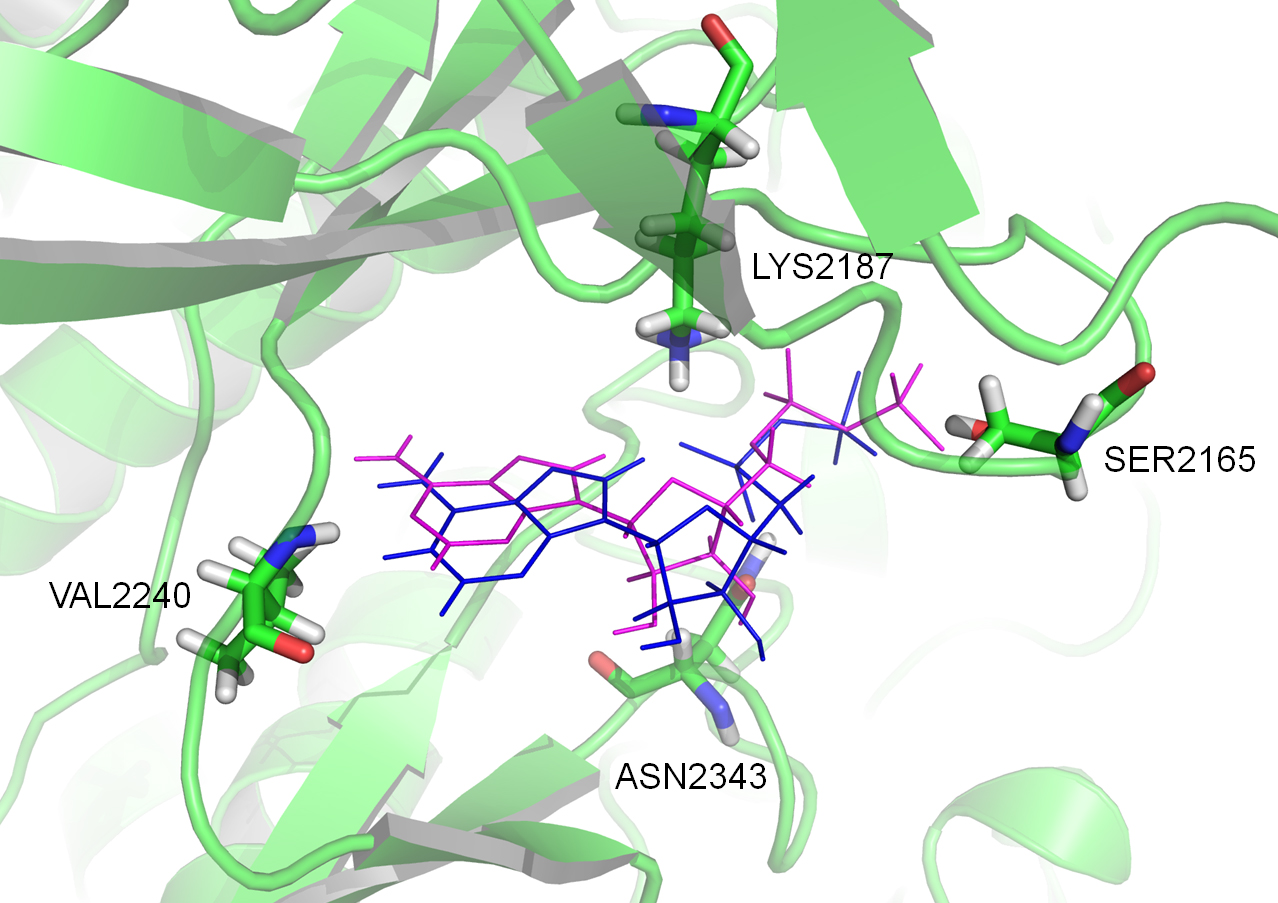


Figure S3 Re-docking study for the co-crystal reference ligand in 4JVS. Blue: the original conformation of the ligand in 4JSV; Red: the virtual docking conformation of ligand.

## MD simulations

**MD** **simulation:** MD simulations were performed using GROMACS 2016.3.1-3 The Amber99sb-ildn force field was used to simulate the protein, acpype3 (http://bio2byte.be/acpype/) was used to generate small-molecule topologies based on gaff force field, and the water molecules were modeled using TIP3P.4,5 The size of the simulation box was set so that each atom of the protein was more than 1.0 nm away from the box. The box was filled with water molecules, and water molecules were replaced with Cl- ions to make the simulation system electrically neutral. Then, the steepest descent energy-reduction method was used to simulate and optimize the system, reducing any unreasonable contacts or atom overlap. The restricted MD simulation was used to balance the system under the regular and isothermal isobaric ensembles, respectively. The Verlet frog jumping algorithm was used to solve Newton’s equations of motion, and the integration step was set to 2 fs. During the calculation, the Lennard-Jones function was used to calculate the Van der Waals force. The non-bond truncation distance was set to 1.2 nm. The bond length of all atoms was constrained by the LINCS algorithm. The particle mesh Ewald method was used to calculate long-range electrostatic interactions.6 The dot width was set to 0.16 nm. Periodic boundary conditions were used during the simulation. All MD simulations were performed under an isothermal isostatic ensemble at a temperature of 298.15 K and a pressure of 1 atmosphere. The temperature and pressure were controlled by the V-rescale and Parrinello–Rahman methods, respectively, and the temperature and pressure coupling constants were 0.1 and 0.5 ps, respectively. The MD simulation time of the system was 100 ns.


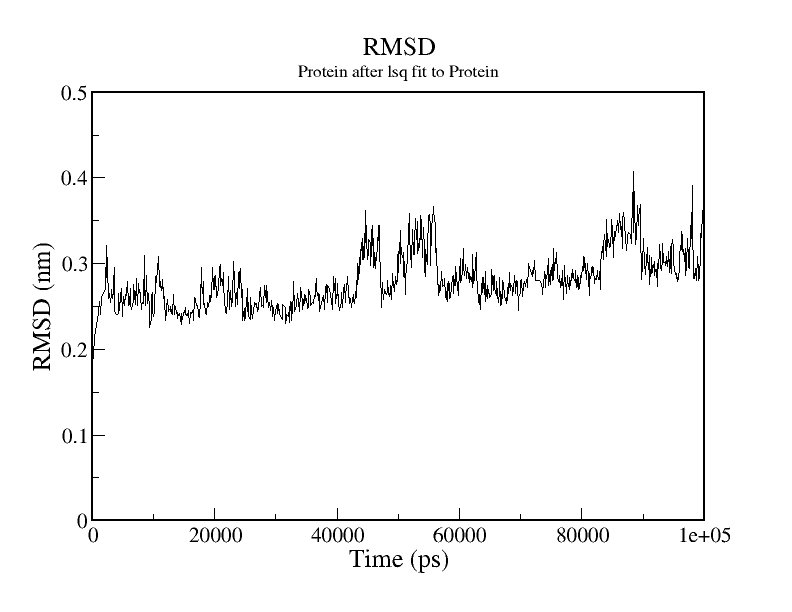


Figure S4 Changes in protein root-mean-square deviation (RMSD) values during the molecular dynamics simulation.


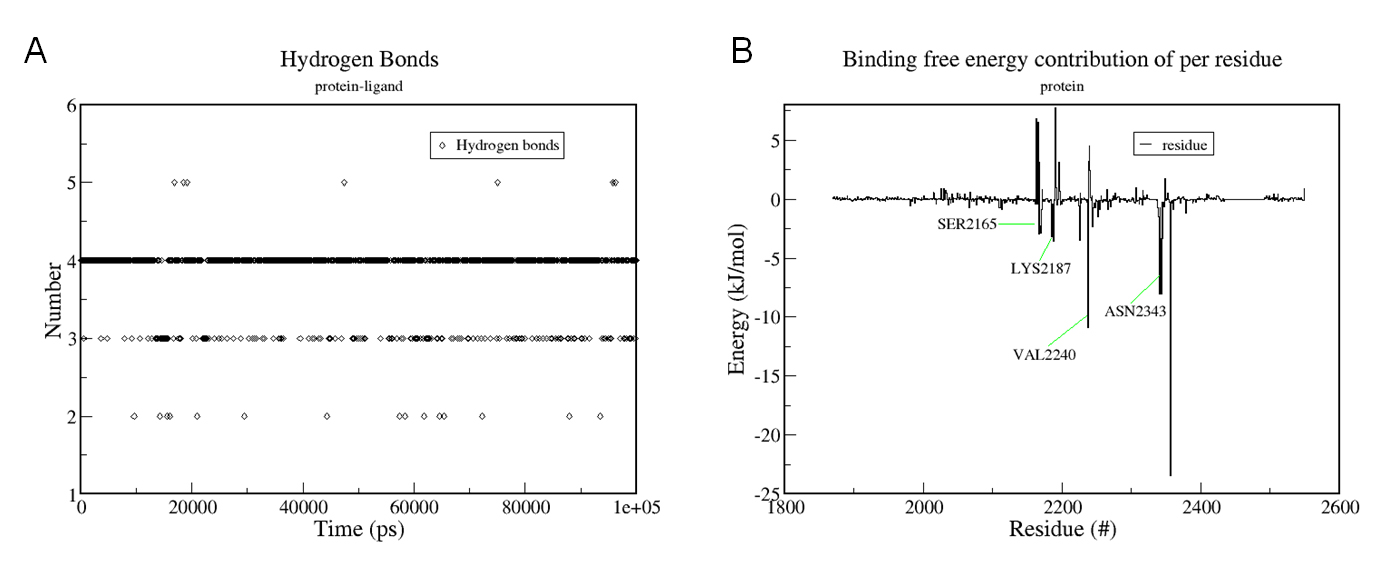


Figure S5 (A) The number of hydrogen bonds during the molecular dynamics simulation; (B) Residual energy contribution.


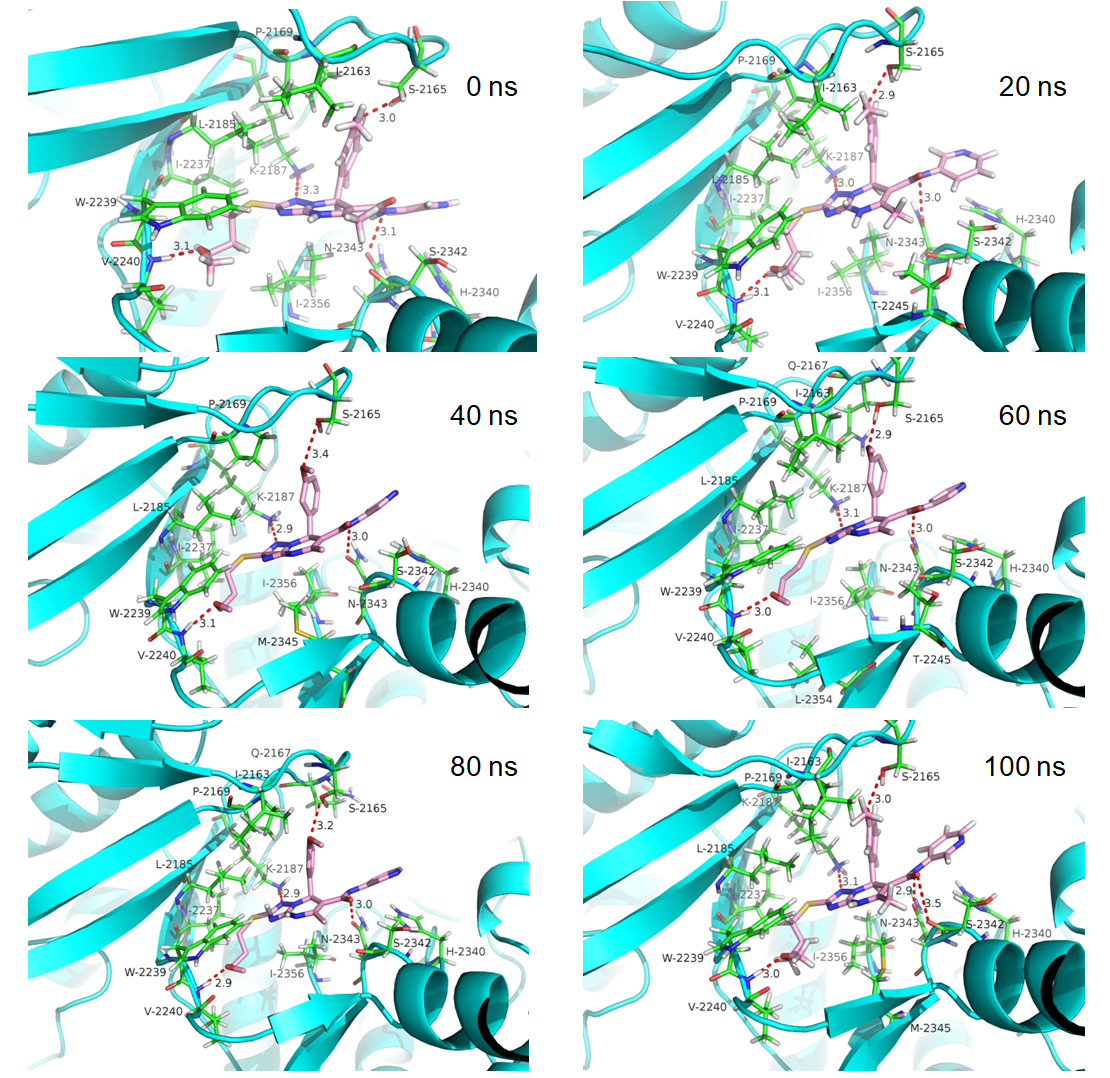


Figure S6 mTOR-**B170422** interaction diagram in 0 ns, 20 ns, 40 ns, 60 ns, 80ns and 100 ns during the molecular dynamics simulation.

Molecular docking showed that **B170422** formed stable hydrogen bonds with SER2165, LYS2187, VAL2240, and ASN2343 in mTOR. MD simulations of the docking model (protein–**B170422**) were used to further demonstrate the stability of the four key hydrogen bonds. The MD simulation results showed that the overall residual base fluctuation of the protein was less than 0.4 nm (Figure S4 in Supplementary Materials), suggesting that the structure of the protein binding with **B170422** was stable. The number of hydrogen bonds formed between the protein and **B170422** was analyzed using the gmx hbond program. The results showed that there were only four hydrogen bonds in the whole simulation (Figure S5A), and they existed most of the time during the simulation process (Figure S6). Simulation system files were output every 20 ns (from 0 to 100 ns); these data showed that the four hydrogen bonds were stable (Figure S6). In addition, the MD simulation results demonstrated that the four amino acids made a great contribution to the stable binding between the protein and **B170422** (Figure S5B).

## Western blot assays

MHCC97-H cells (5x106 cells per 75T flask) were incubated for 24 h following pretreatment with solvent control, rapamycin, **2a** and GSK2126458 for 12 h. The dosing concentrations of rapamycin, **2a** and GSK2126458 all were set to 1 μmol/L. At the end of the exposure period, cells were lysed in RIPA (Radio Immunoprecipitation Assay) buffer (Cell Signaling Technology, Danvers, MA, USA). Protein concentration was determined using the Pierce bicinchoninic acid protein assay kit (Thermo Fisher Scientific, Inc.) according to the manufacturer’s instructions. Protein samples (40 μg) were loaded into each well of a 10–12% polyacrylamide gel and separated by sodium dodecyl sulfate polyacrylamide gel electrophoresis (Millipore, Billerica, USA). The membrane was blocked with 5% skim milk in Tris‑buffered saline with 0.1% Tween-20 and incubated with antibodies (1:1000) at 4 °C. β-actin was employed as the loading control. Rabbit antibodies against human phospho-p70S6K, p70S6K, phospho-AKT (Ser473), AKT, β-actin and secondary antibodies were purchased from Cell Signaling Technology (Danvers, MA, USA).7-9


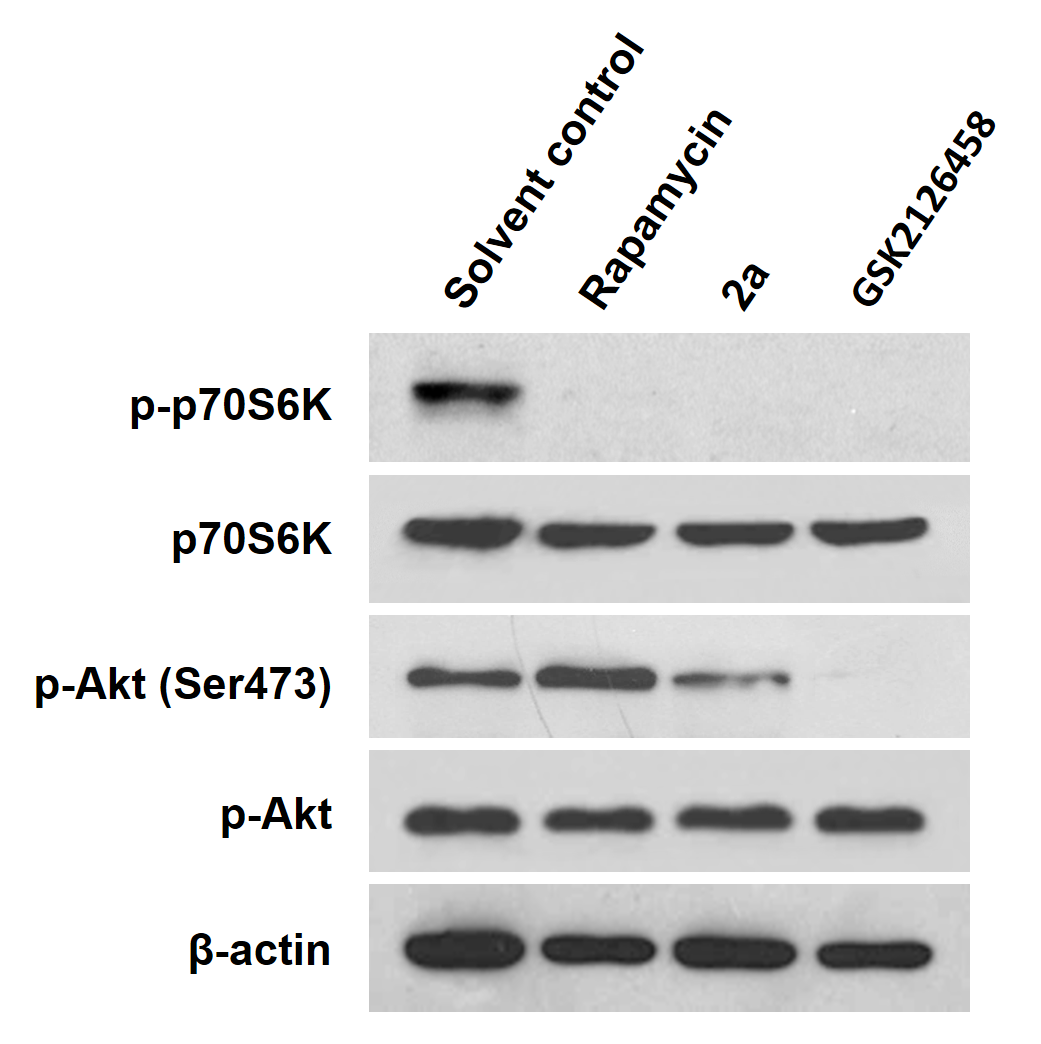


Figure S7 the inhibitory effect of compounds on mTORC1 and mTORC2.

The inhibitory activitiy of **2a** on mTORC1 and mTORC2 was examined by western blot analysis (Figure S7). Phospho-p70S6K1 and phospho-AKT (Ser473) are downstream effectors of mTORC1 and mTORC2, respectively. Rapamycin (mTORC1 specific inhibitor) and GSK2126458 (mTORC1/mTORC2 dual inhibitor) were selected as the control agents. The results of the analysis showed that **2a** had a definite inhibitory effect on both mTORC1 and mTORC2, and the inhibitory effect on mTORC1 was stronger than that on mTORC2.


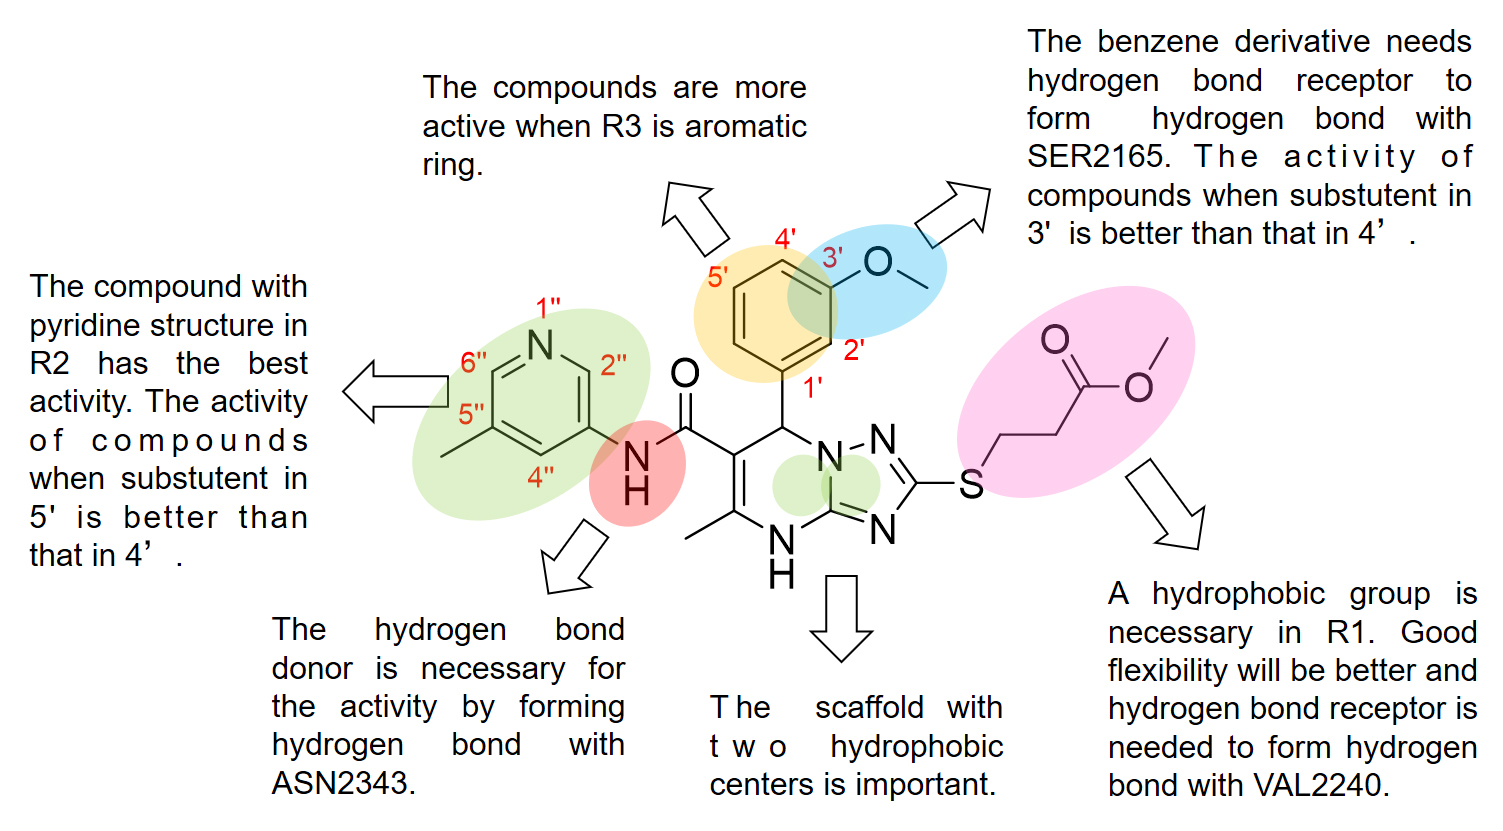


Figure S8 Structure-activity relationship of compound **2a**.

[**References**](javascript:;)

1. Berendsen HJ, van der Spoel D, van Drunen R. GROMACS: a message-passing parallel molecular dynamics implementation. *Computer physics communications.* 1995;91(1-3):43-56.

2. Van Der Spoel D, Lindahl E, Hess B, Groenhof G, Mark AE, Berendsen HJ. GROMACS: fast, flexible, and free. *Journal of computational chemistry.* 2005;26(16):1701-1718.

3. Abraham MJ, Murtola T, Schulz R, et al. GROMACS: High performance molecular simulations through multi-level parallelism from laptops to supercomputers. *SoftwareX.* 2015;1:19-25.

4. Lu JB, Qiu YQ, Baron R, Molinero V. Coarse-Graining of TIP4P/2005, TIP4P-Ew, SPC/E, and TIP3P to Monatomic Anisotropic Water Models Using Relative Entropy Minimization. *J Chem Theory Comput.* 2014;10(9):4104-4120.

5. Price DJ, Brooks CL. A modified TIP3P water potential for simulation with Ewald summation. *J Chem Phys.* 2004;121(20):10096-10103.

6. Kawata M, Nagashima U. Particle mesh Ewald method for three-dimensional systems with two-dimensional periodicity. *Chem Phys Lett.* 2001;340(1-2):165-172.

7. Lu CC, Chiang JH, Tsai FJ, et al. Metformin triggers the intrinsic apoptotic response in human AGS gastric adenocarcinoma cells by activating AMPK and suppressing mTOR/AKT signaling. *International journal of oncology.* 2019;54(4):1271-1281.

8. Hu Y, Tao Y, Hu J. Cannabinoid receptor 2 deletion deteriorates myocardial infarction through the down-regulation of AMPK-mTOR-p70S6K signaling-mediated autophagy. *Bioscience reports.* 2019;39(4):BSR20180650.

9. Su CC, Hsieh KL, Liu PL, et al. AICAR Induces Apoptosis and Inhibits Migration and Invasion in Prostate Cancer Cells Through an AMPK/mTOR-Dependent Pathway. *International journal of molecular sciences.* 2019;20(7):1647-1660.

The 1H-NMR and 13C-NMR spectra of all samples were obtained in DMSO-*d*6 solution. The MS spectra of all samples were obtained in methanol solution.


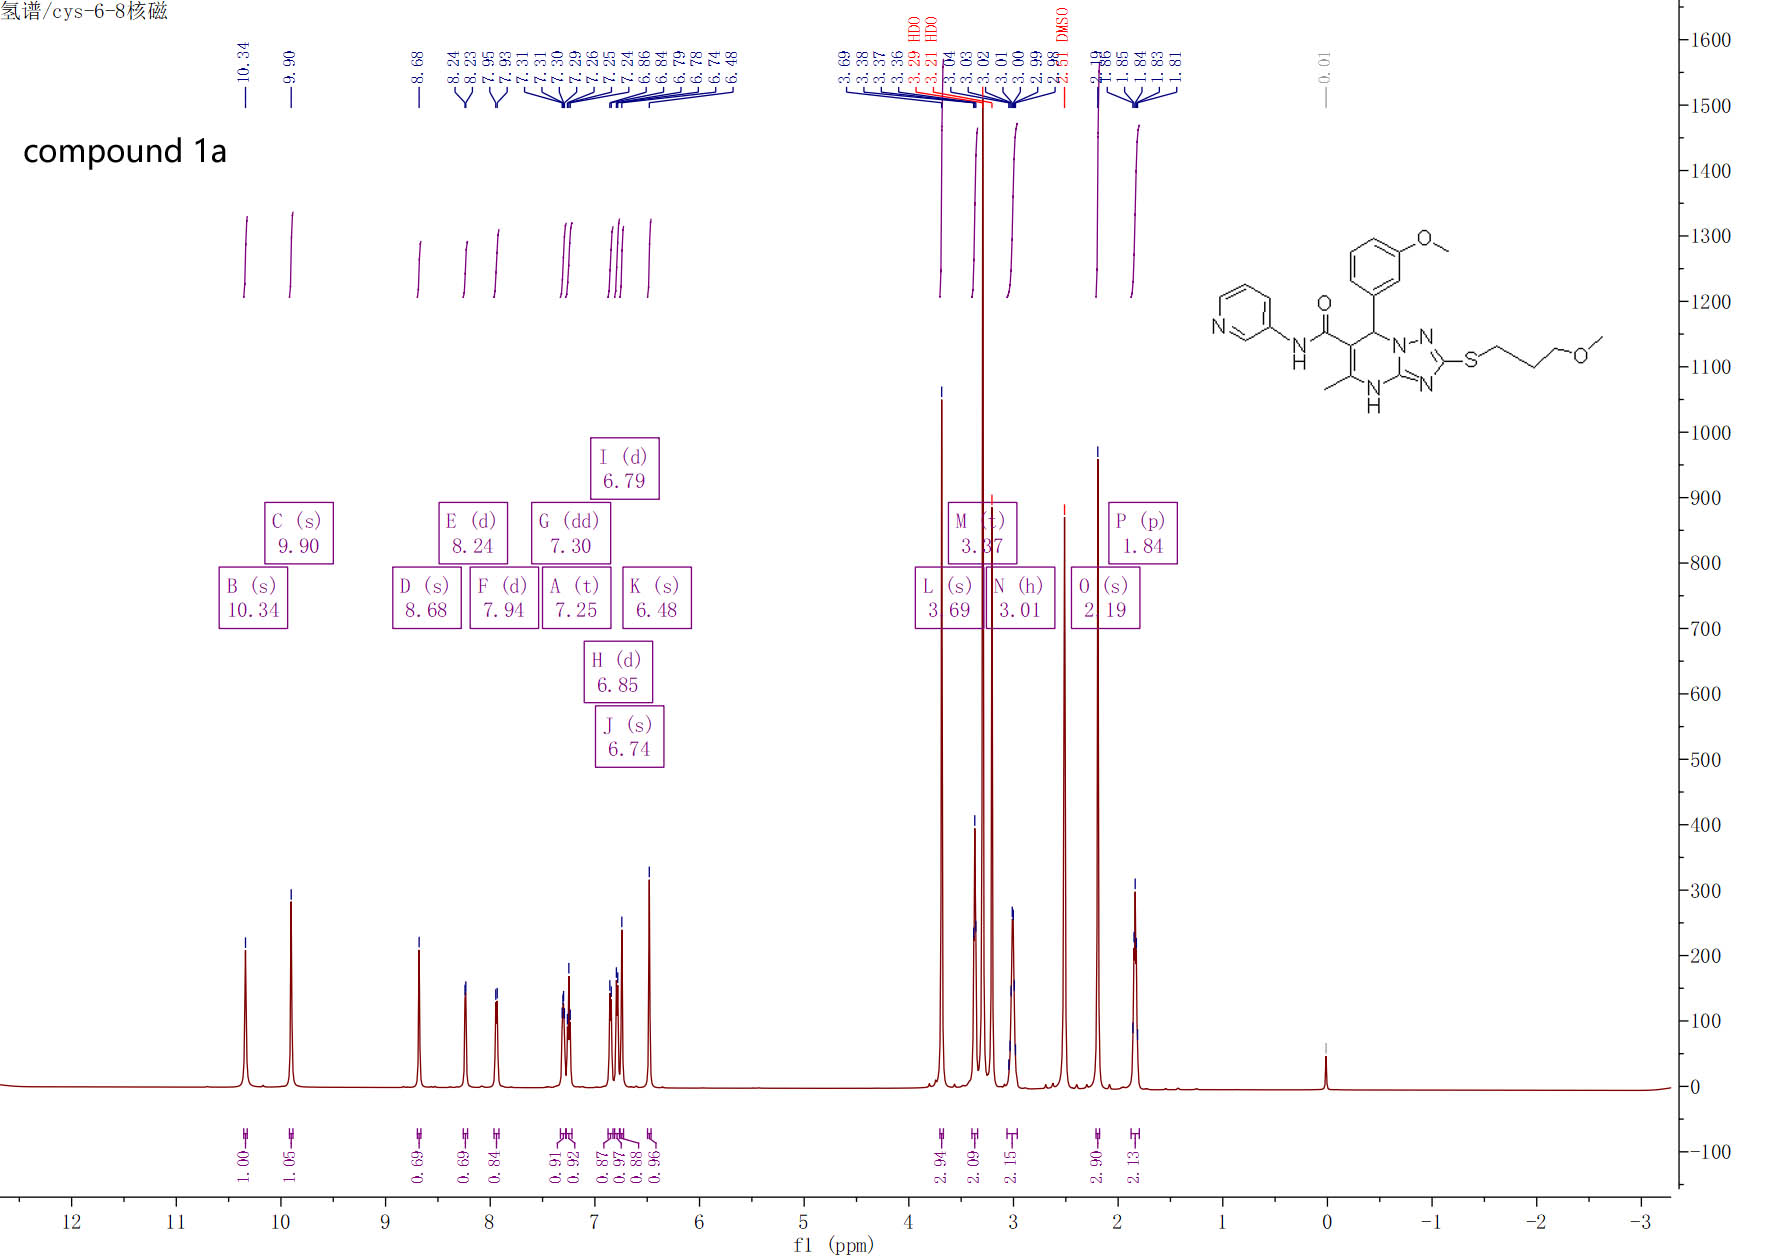


## 1H-NMR spectra of compound 1a


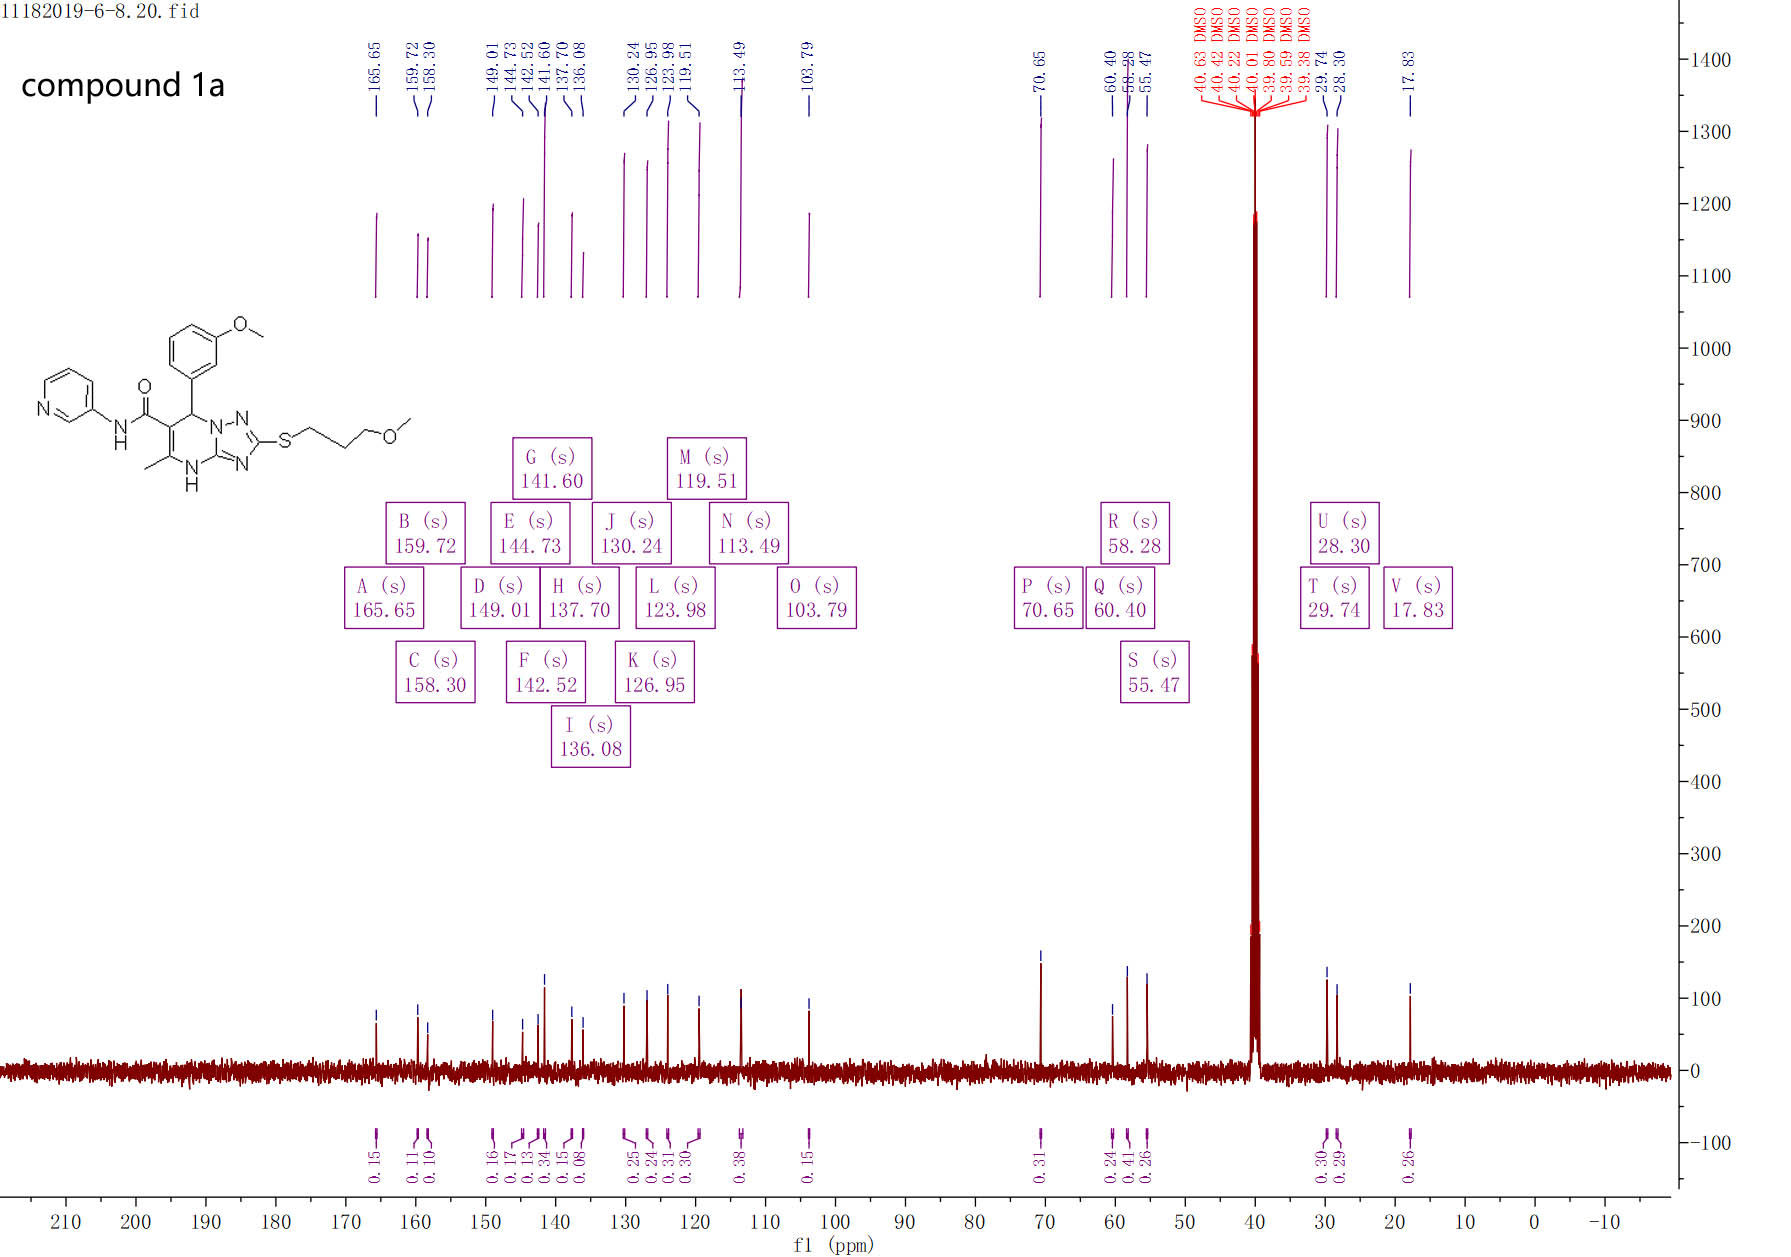


## 13C-NMR spectra of compound 1a


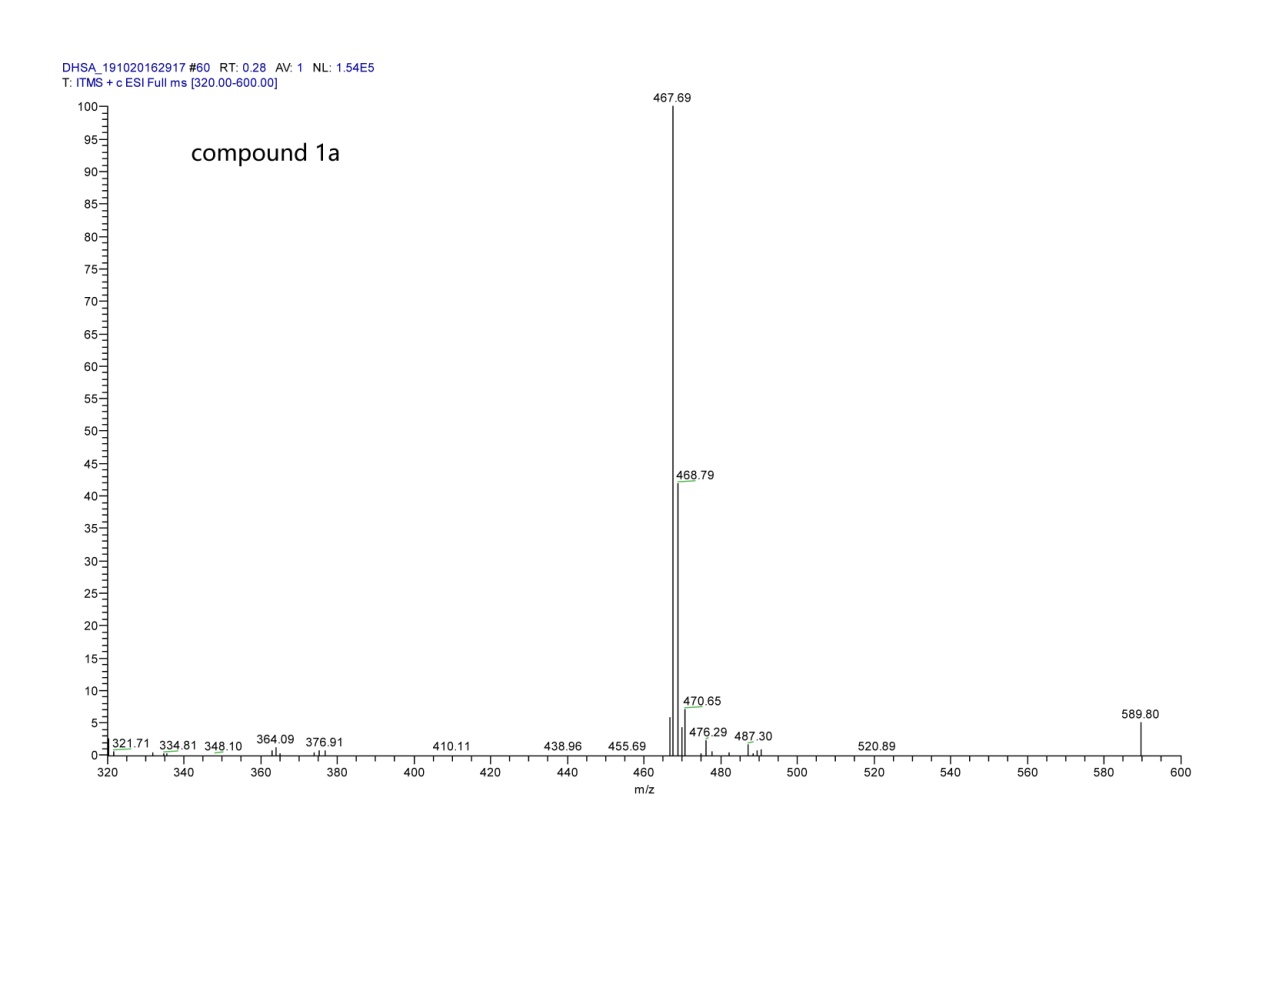


## MS spectra of compound 1a


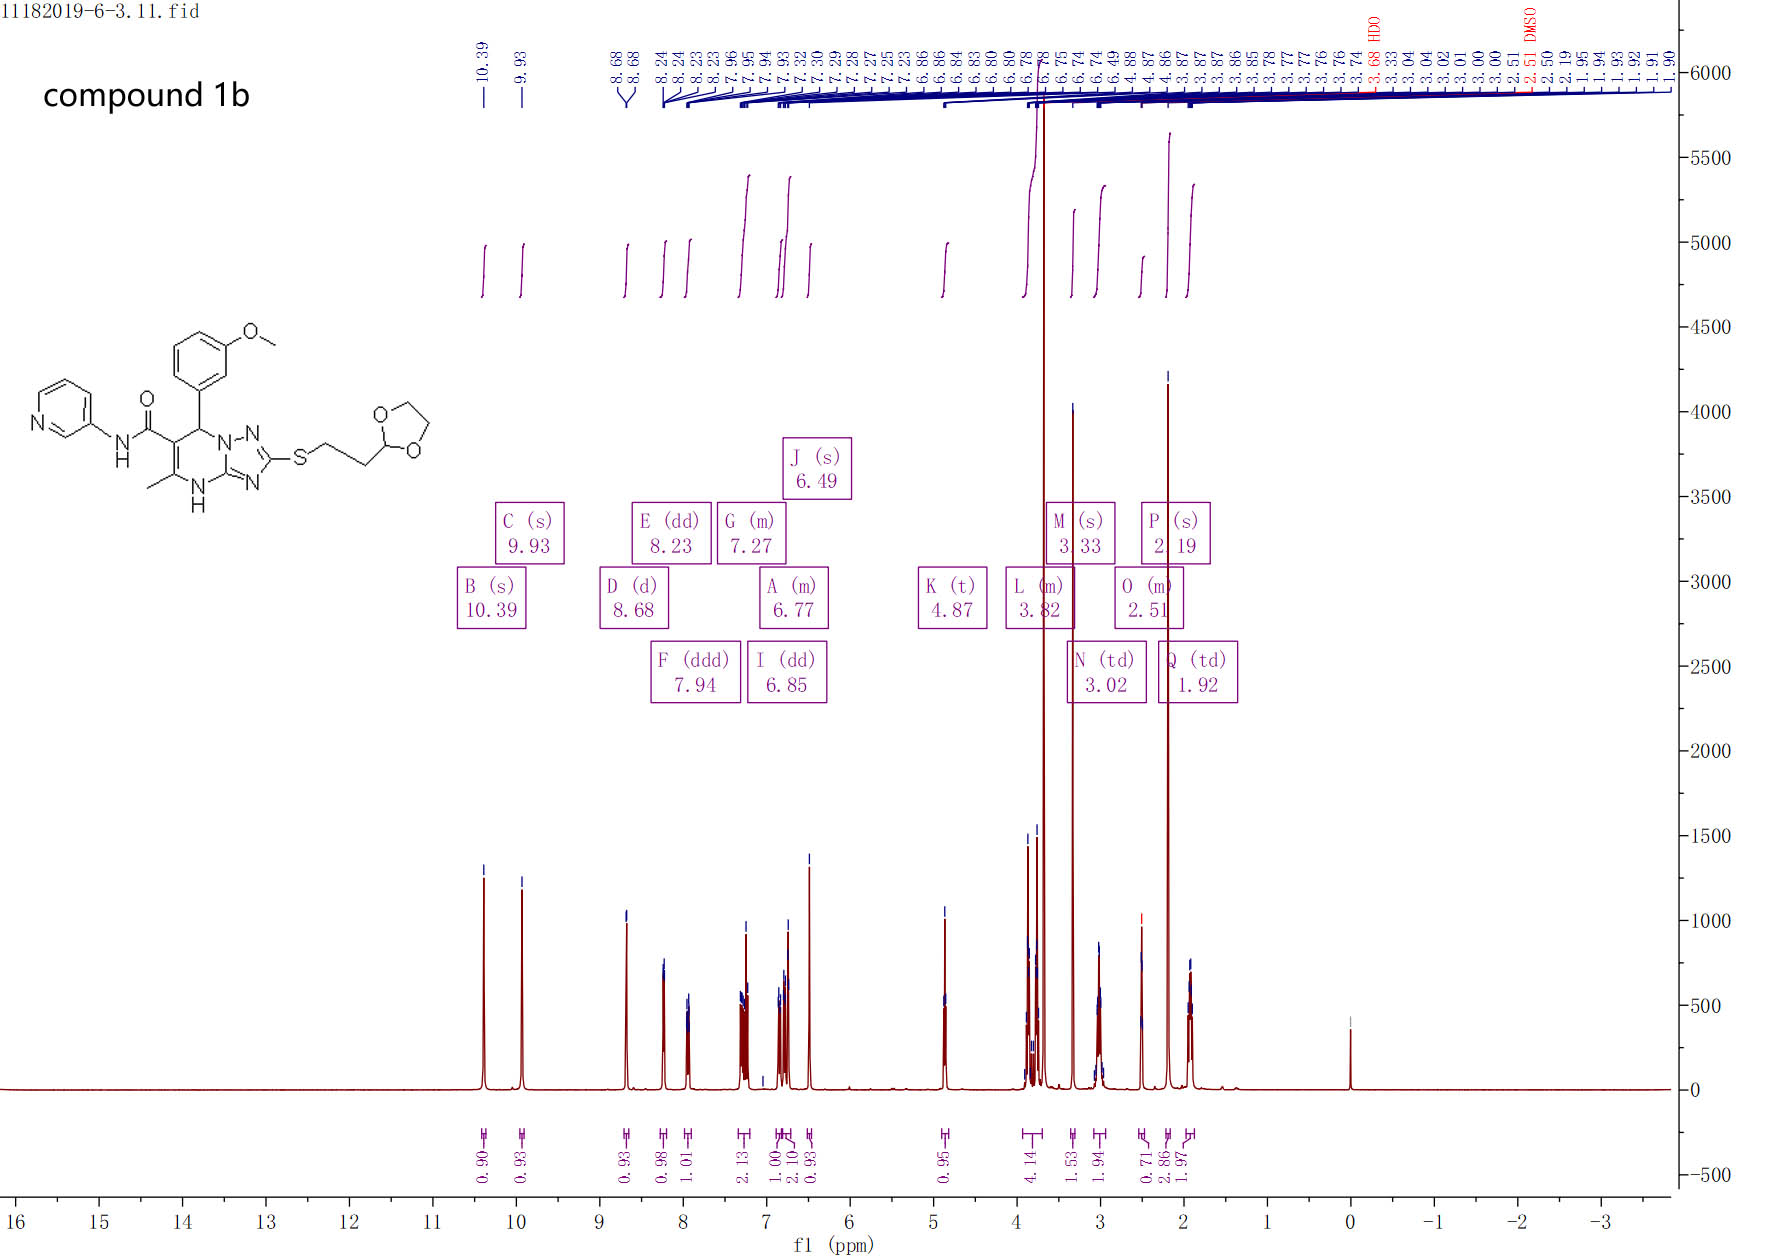


## 1H-NMR spectra of compound 1b


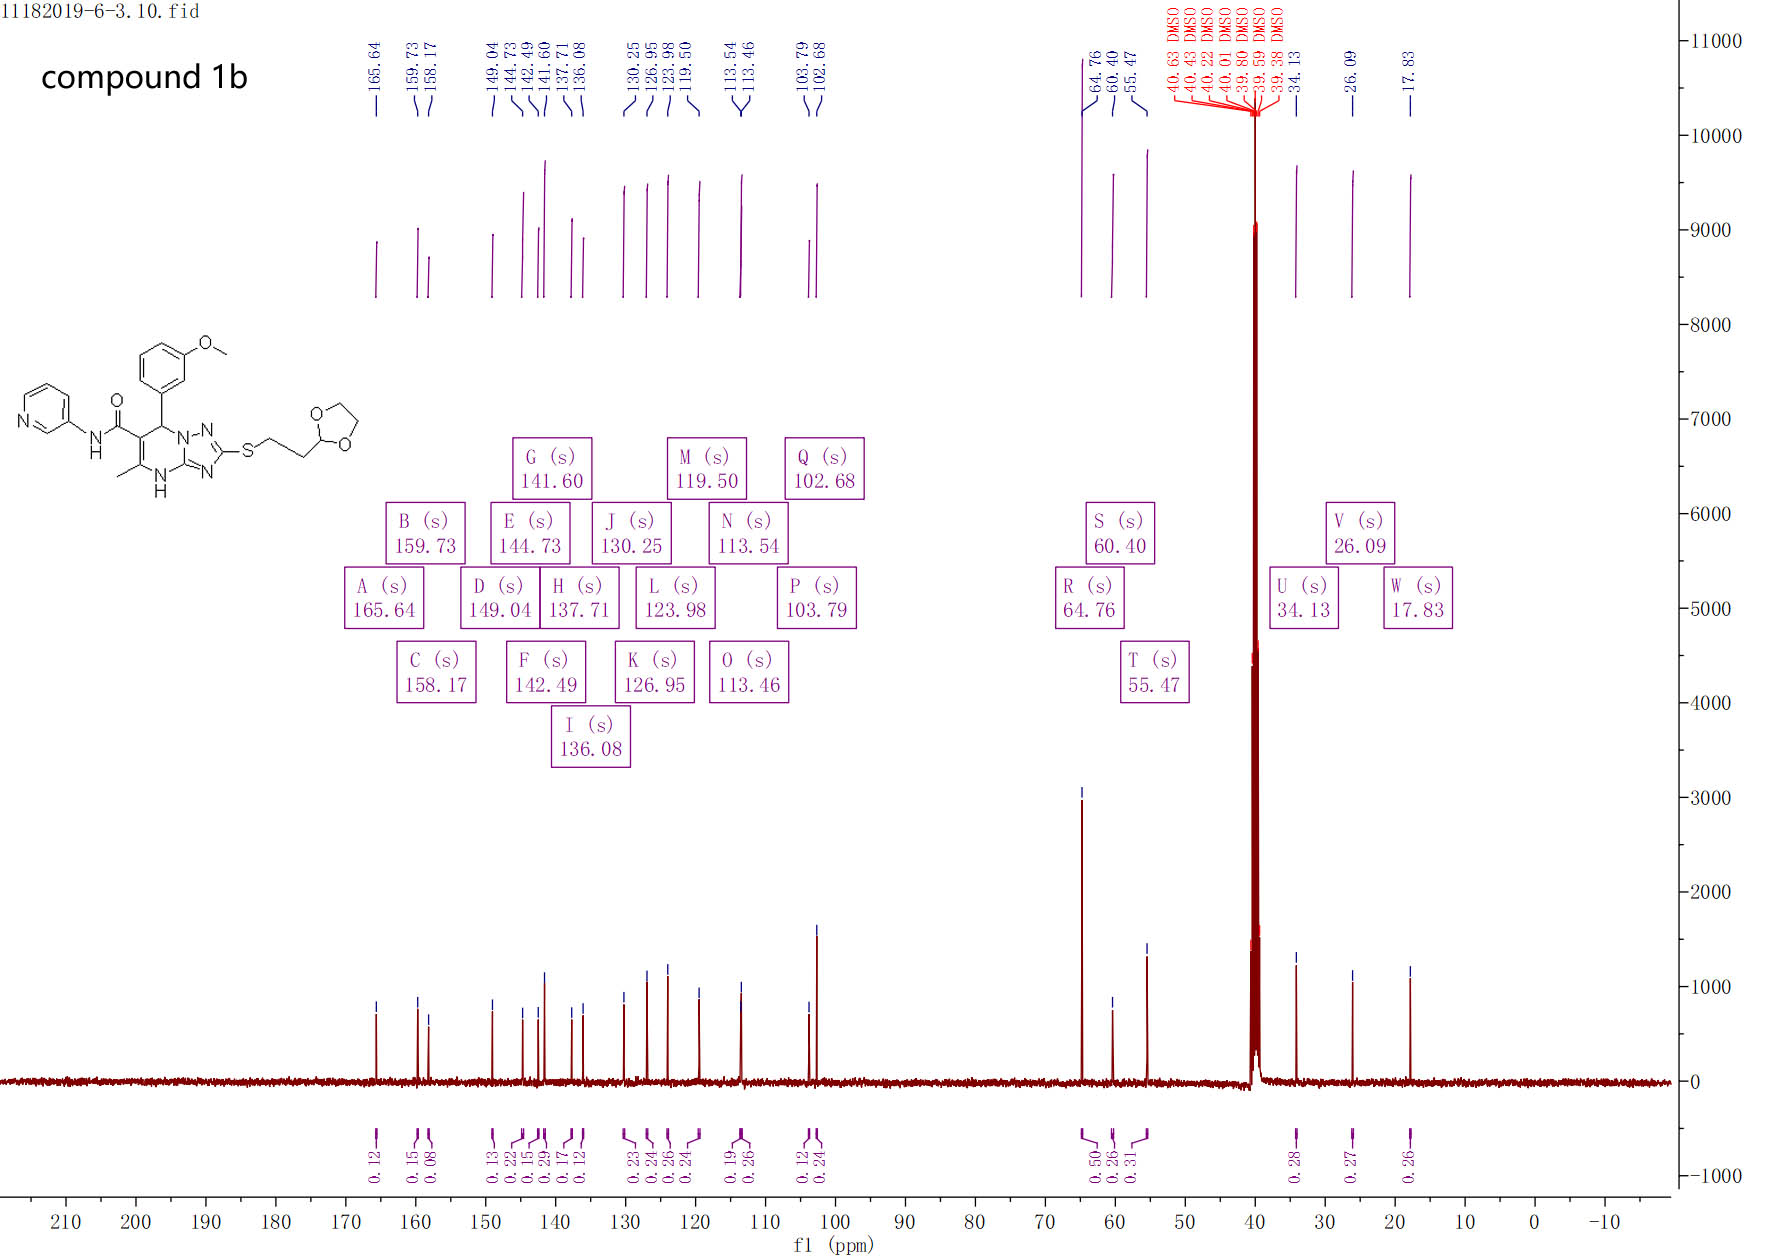


## 13C-NMR spectra of compound 1b


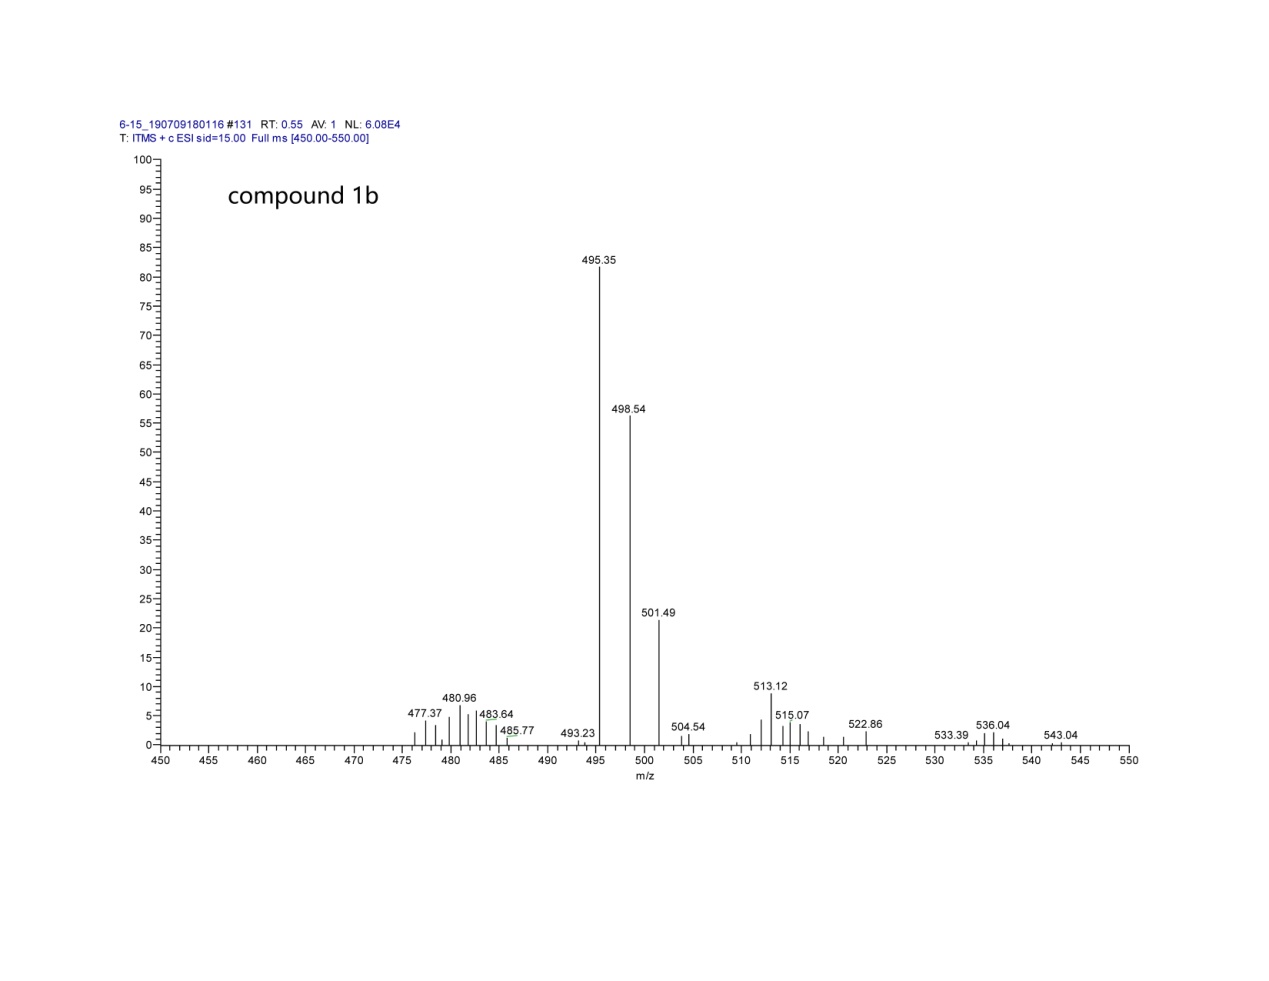


## MS spectra of compound 1b


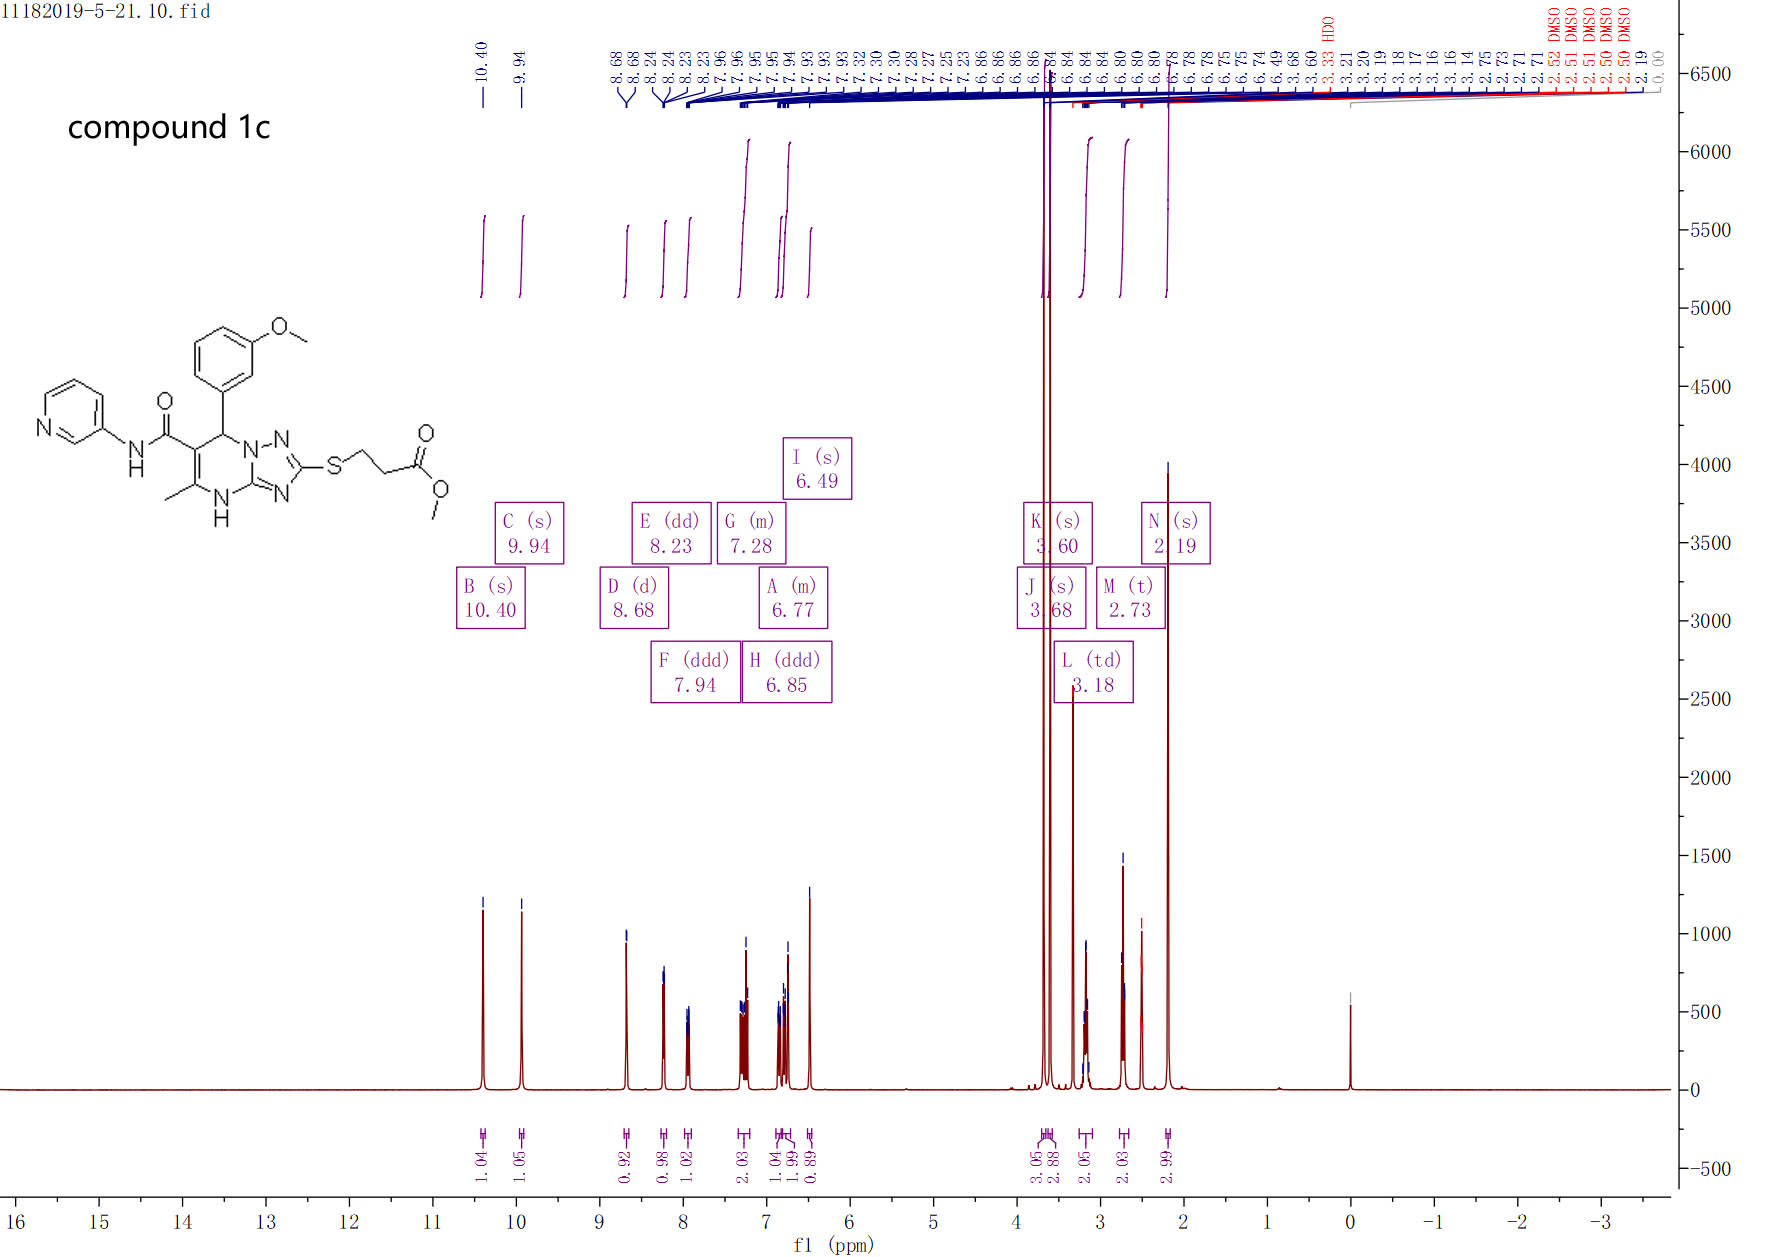


## 1H-NMR spectra of compound 1c


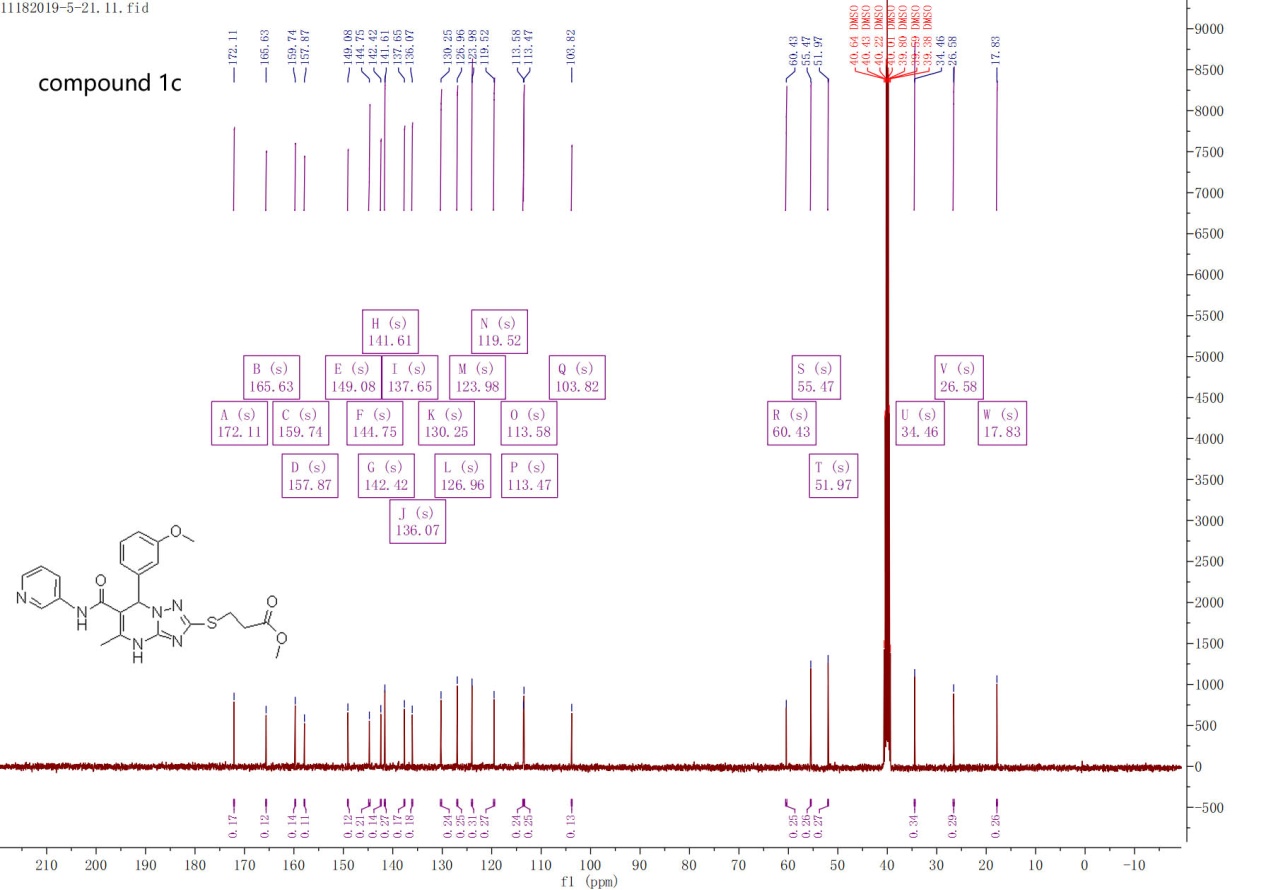


## 13C-NMR spectra of compound 1c


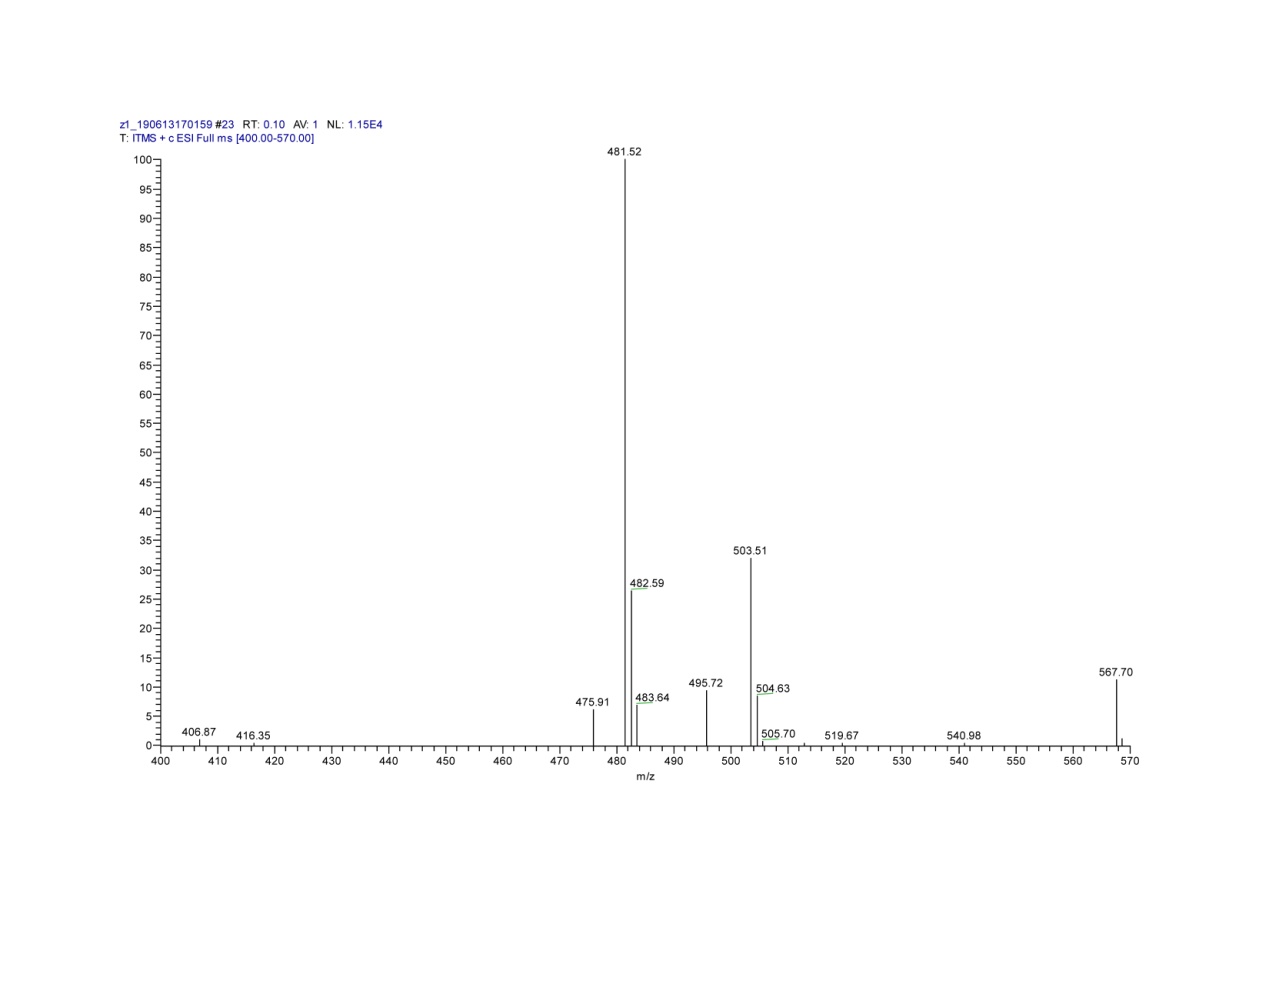


## MS spectra of compound 1c


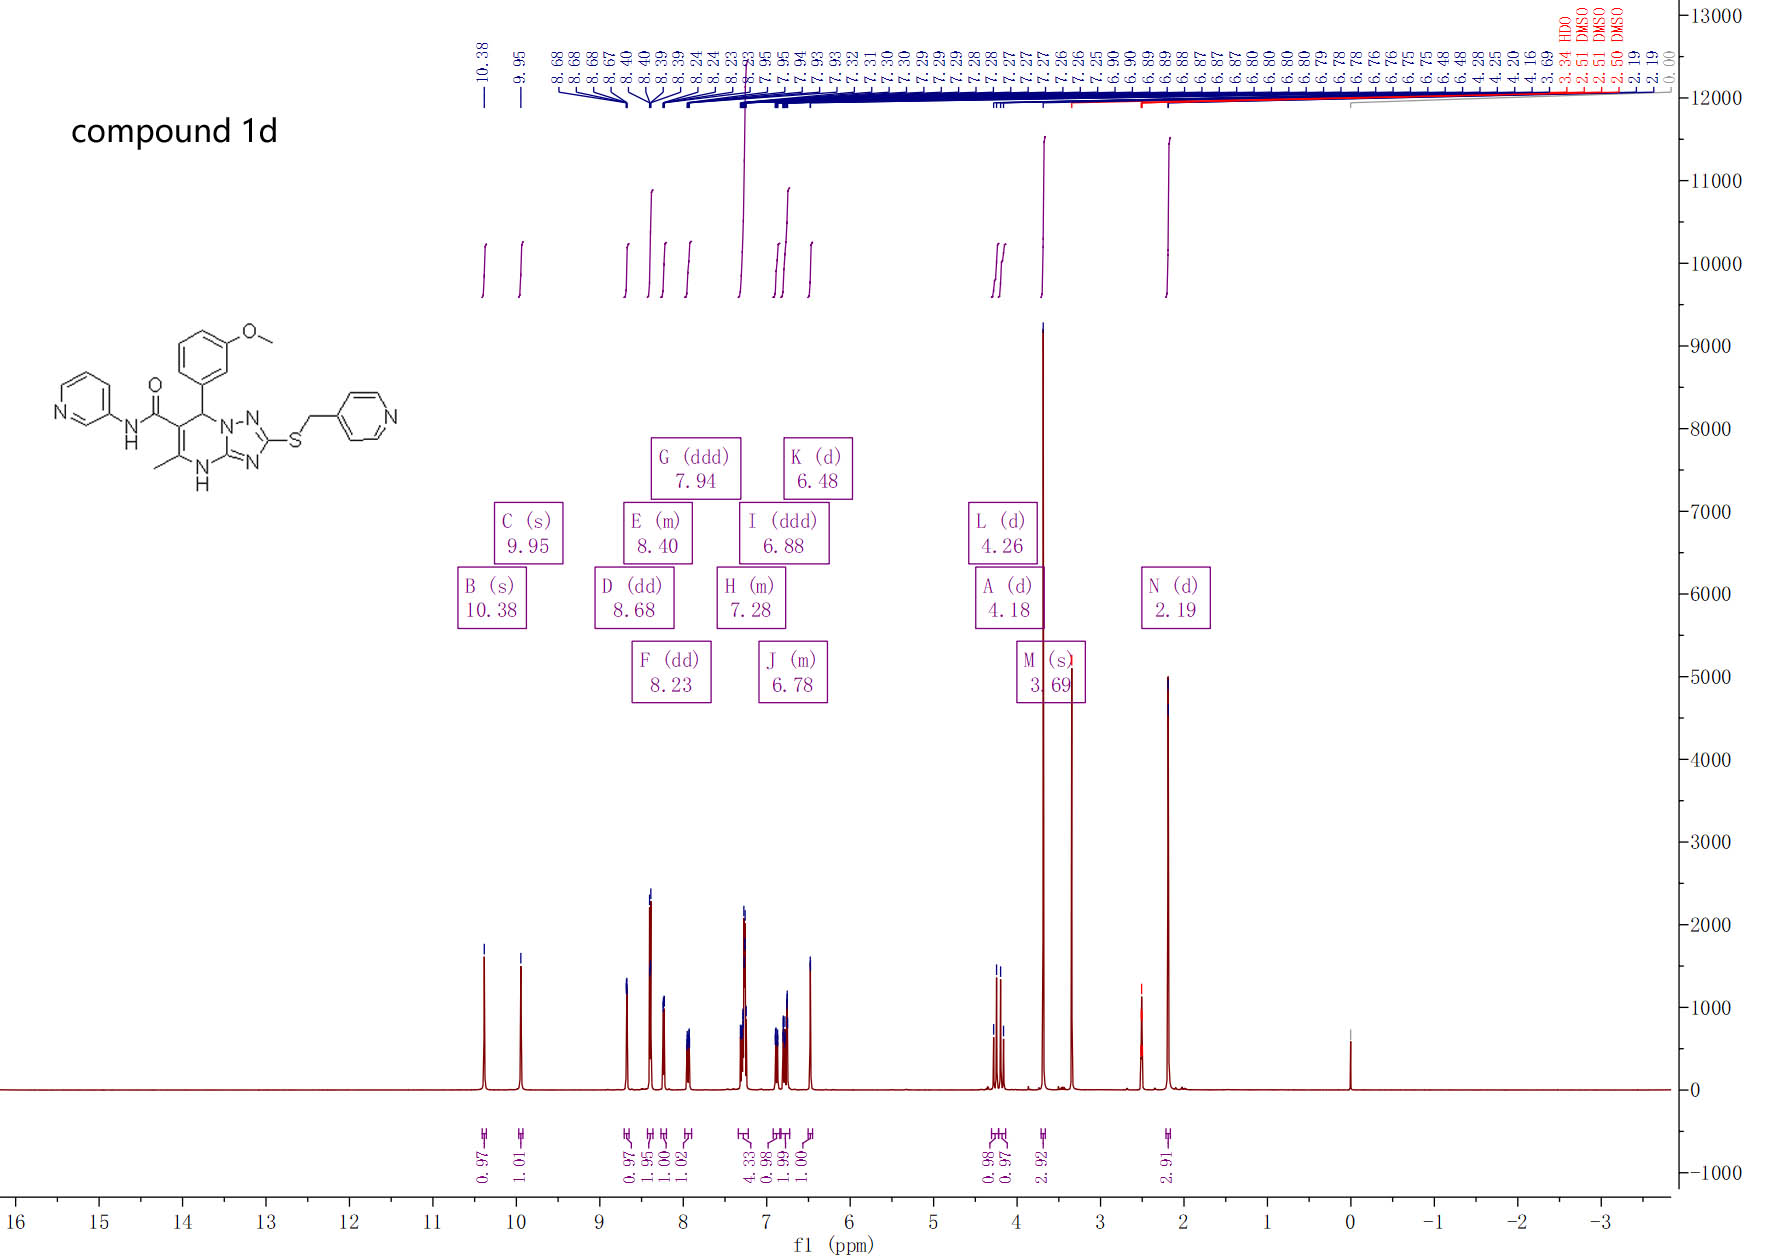


## 1H-NMR spectra of compound 1d


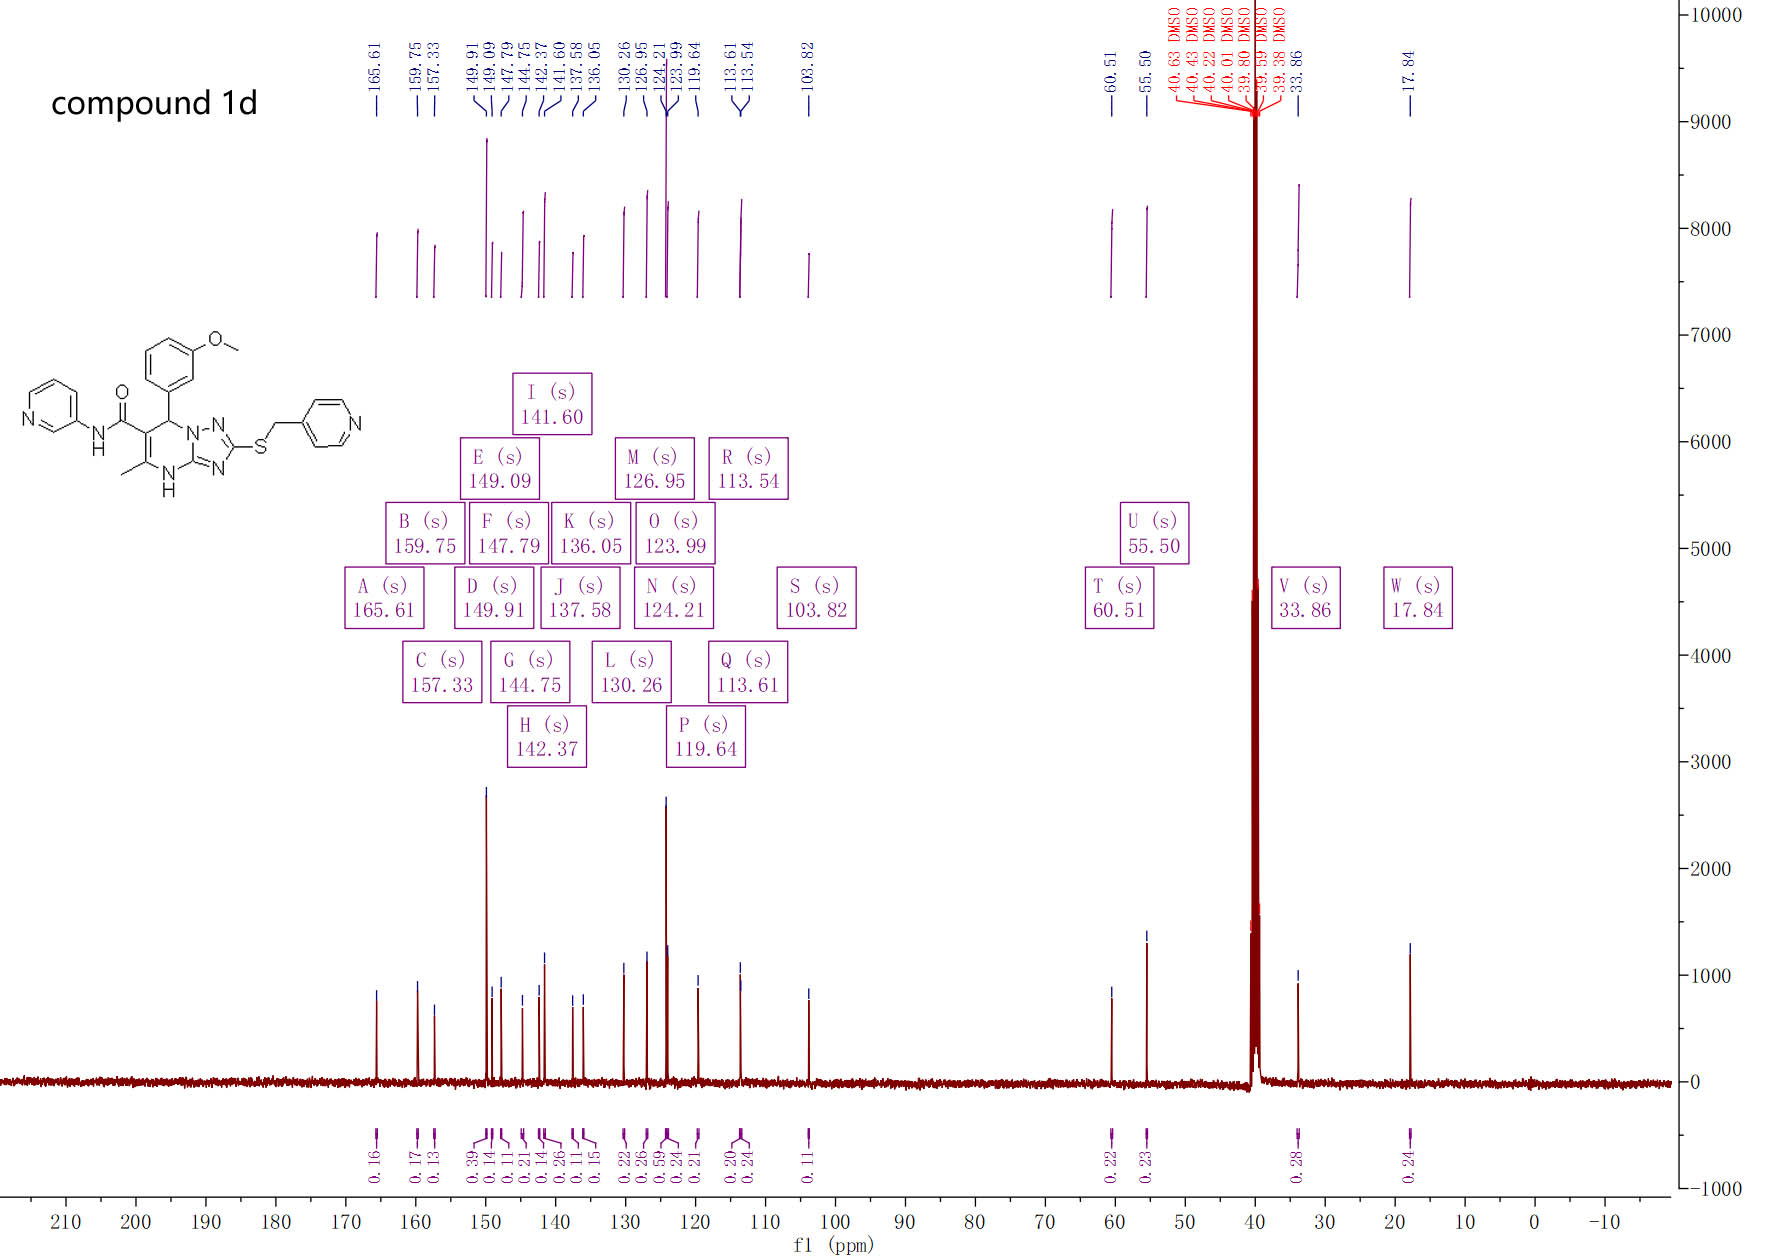


## 13C-NMR spectra of compound 1d

##
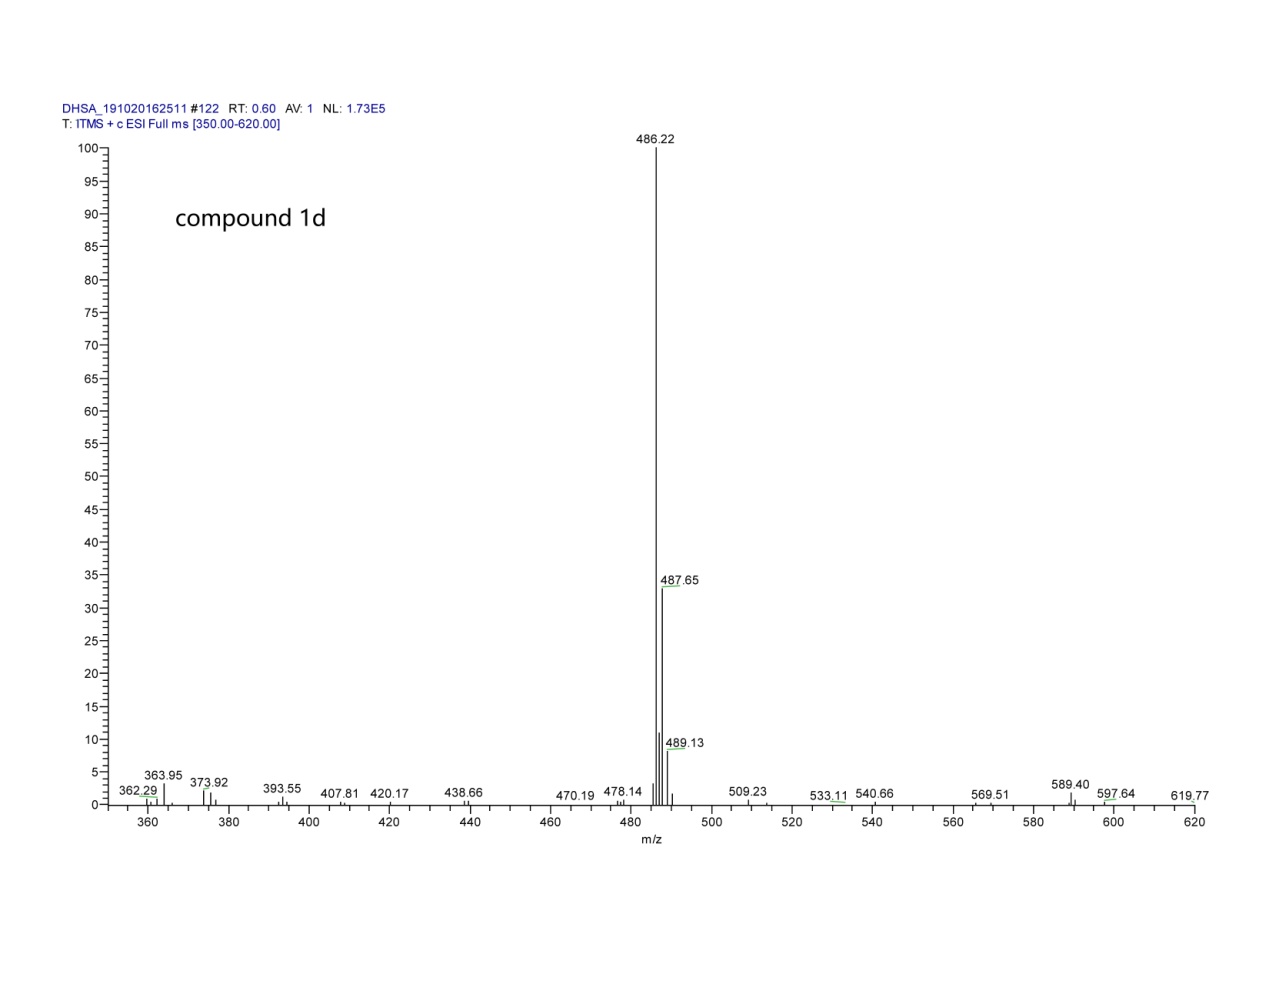
MS spectra of compound 1d


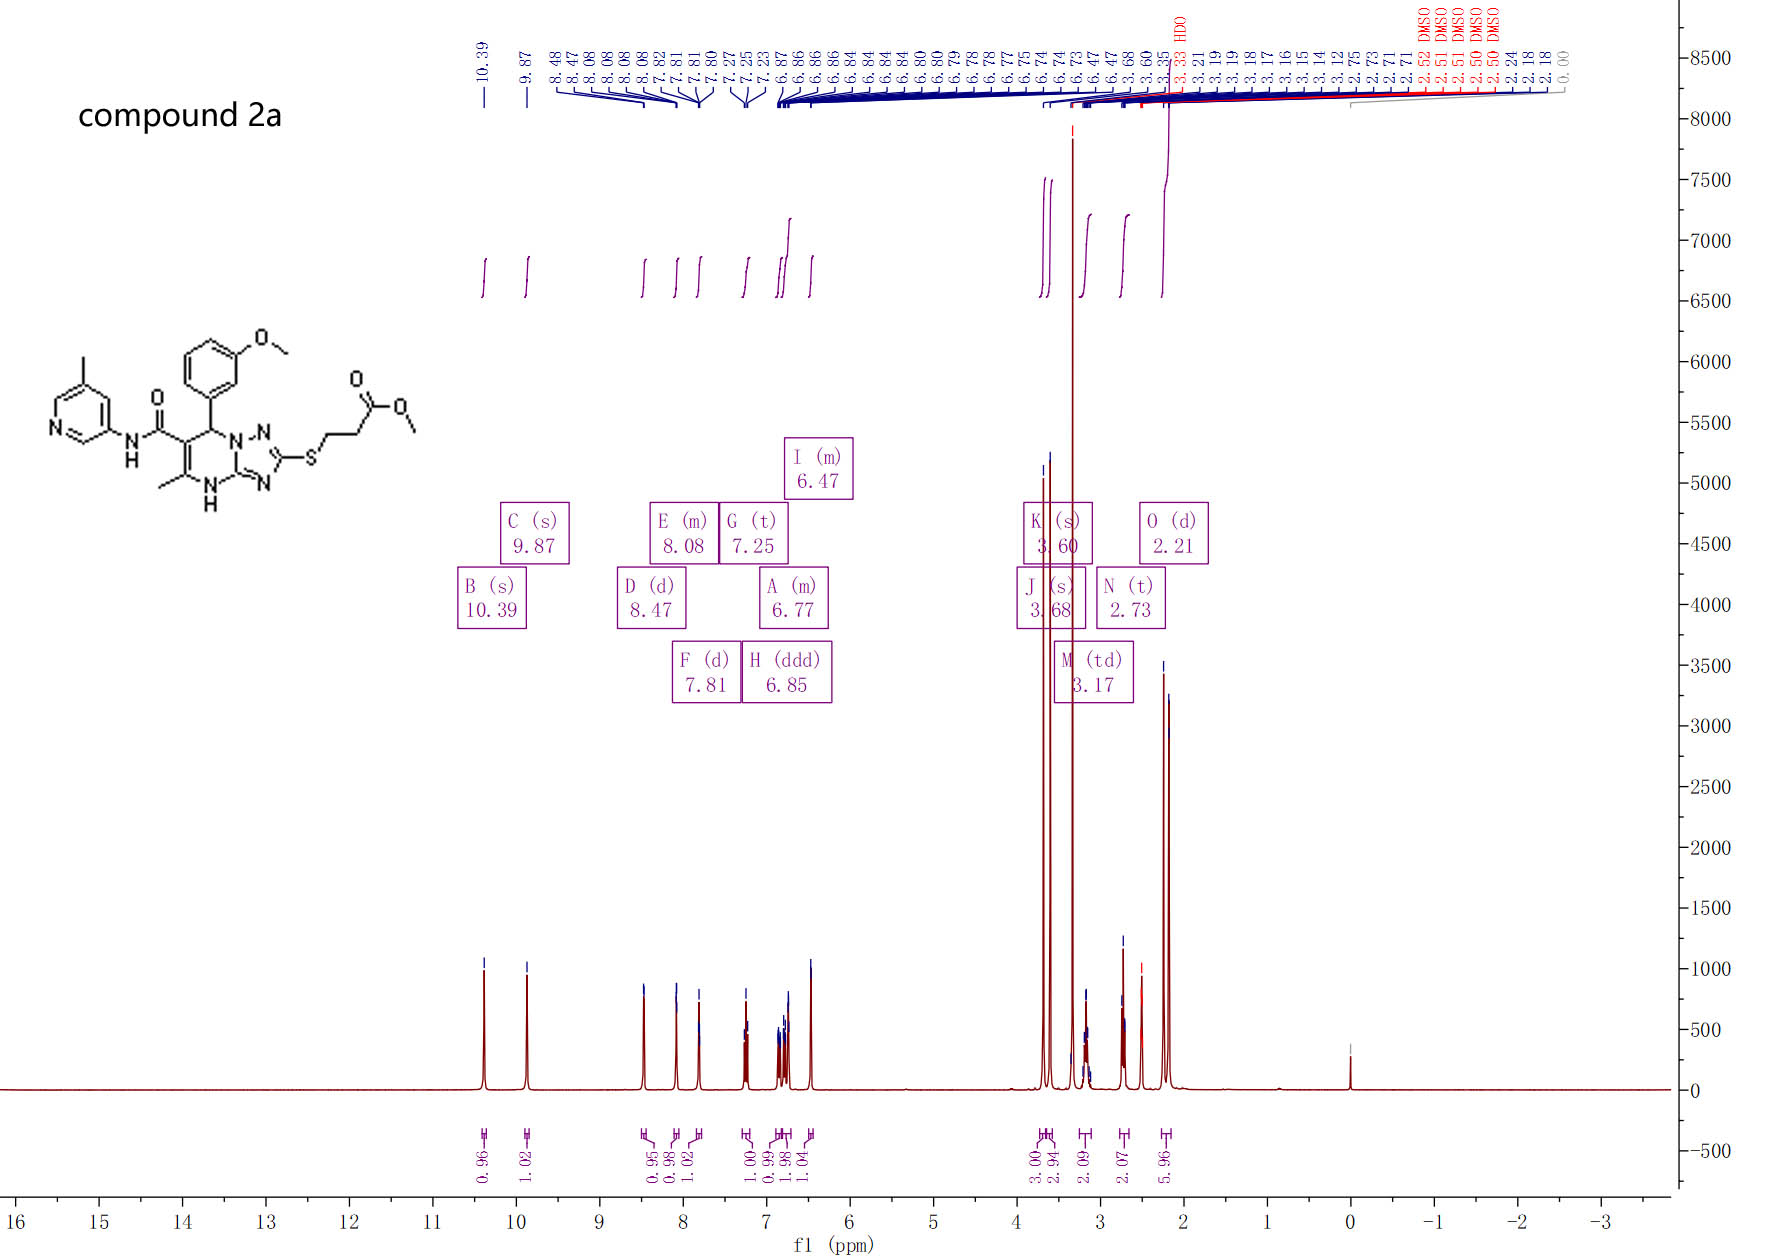


## 1H-NMR spectra of compound 2a


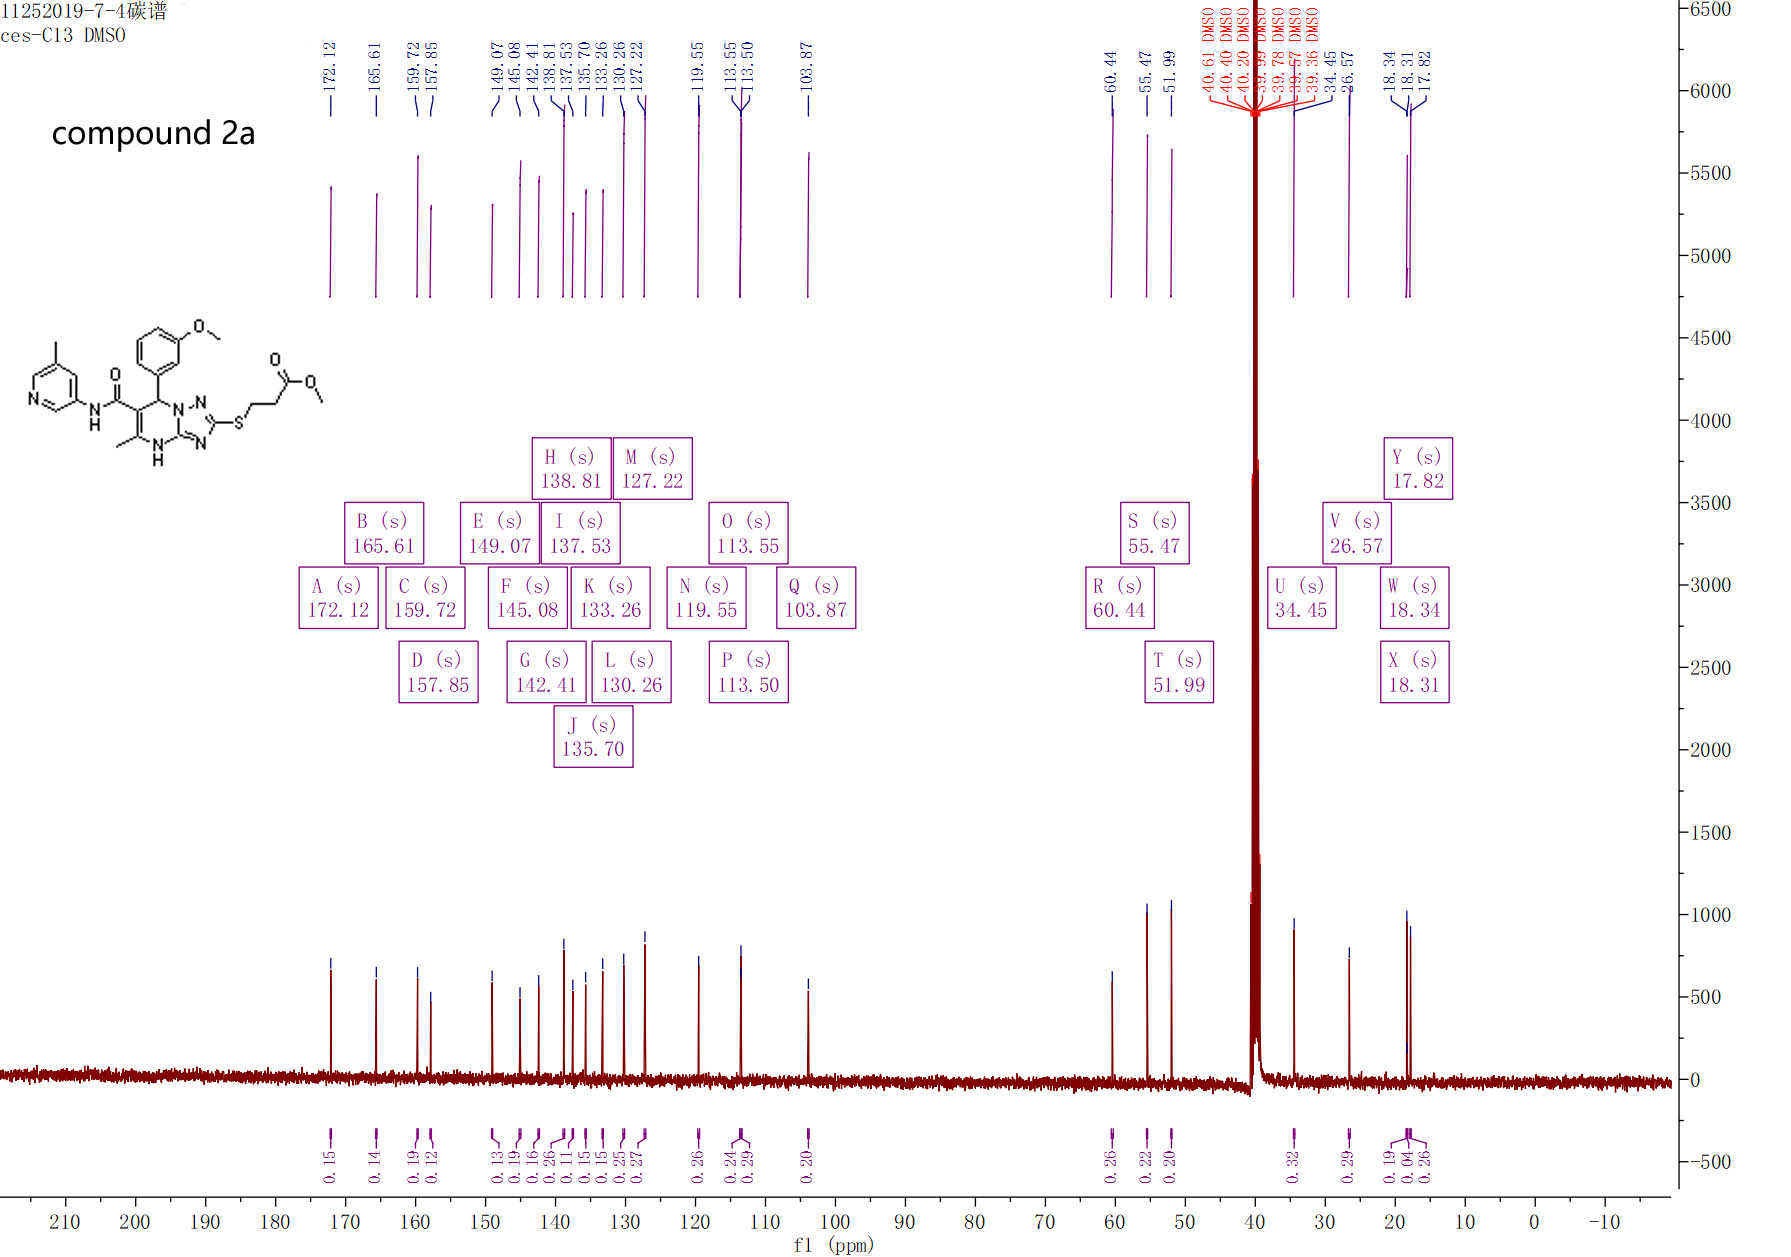


## 13C-NMR spectra of compound 2a


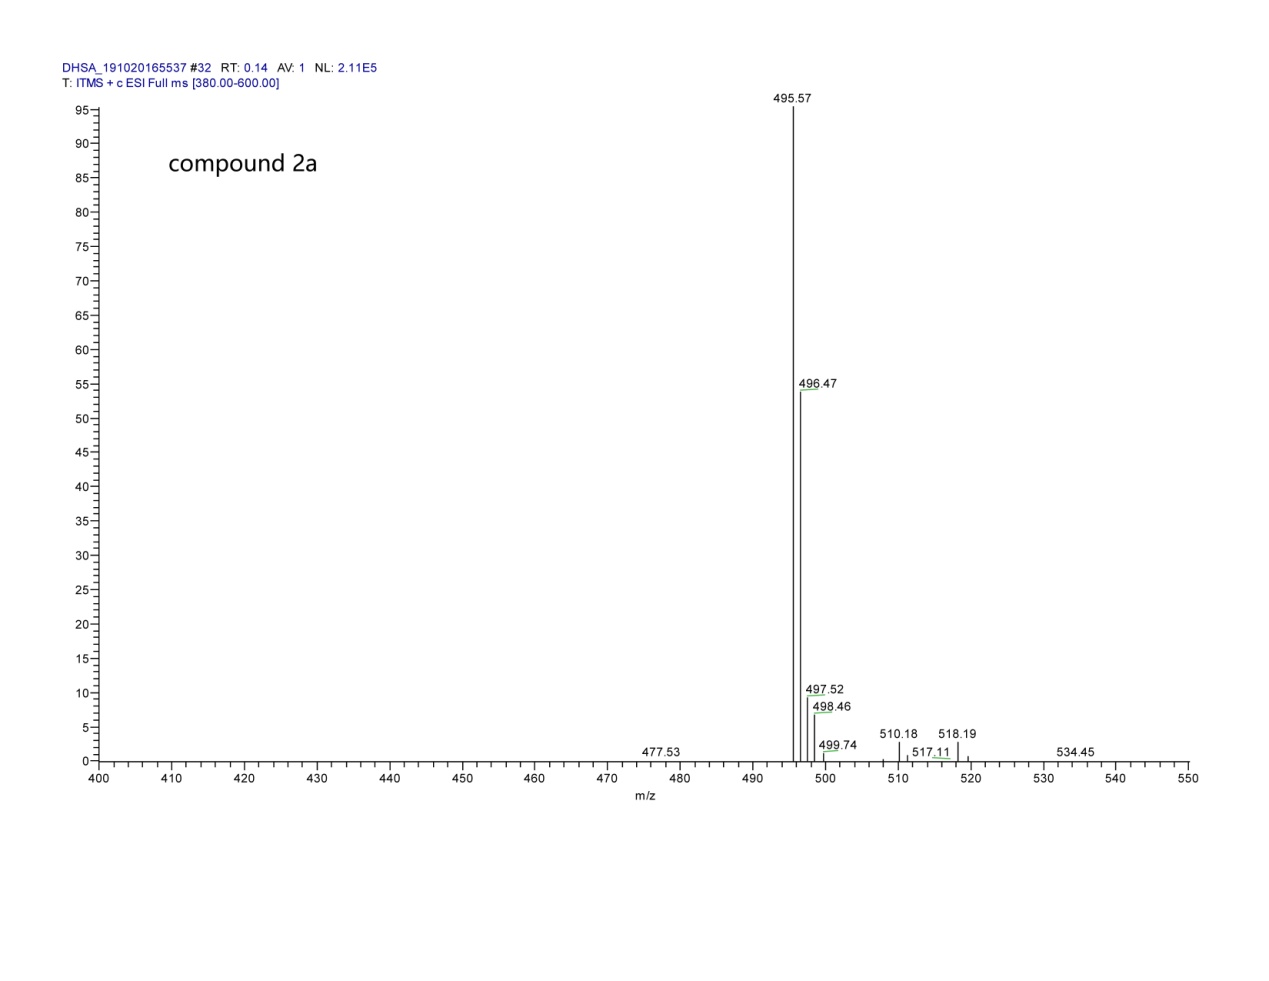


## MS spectra of compound 2a


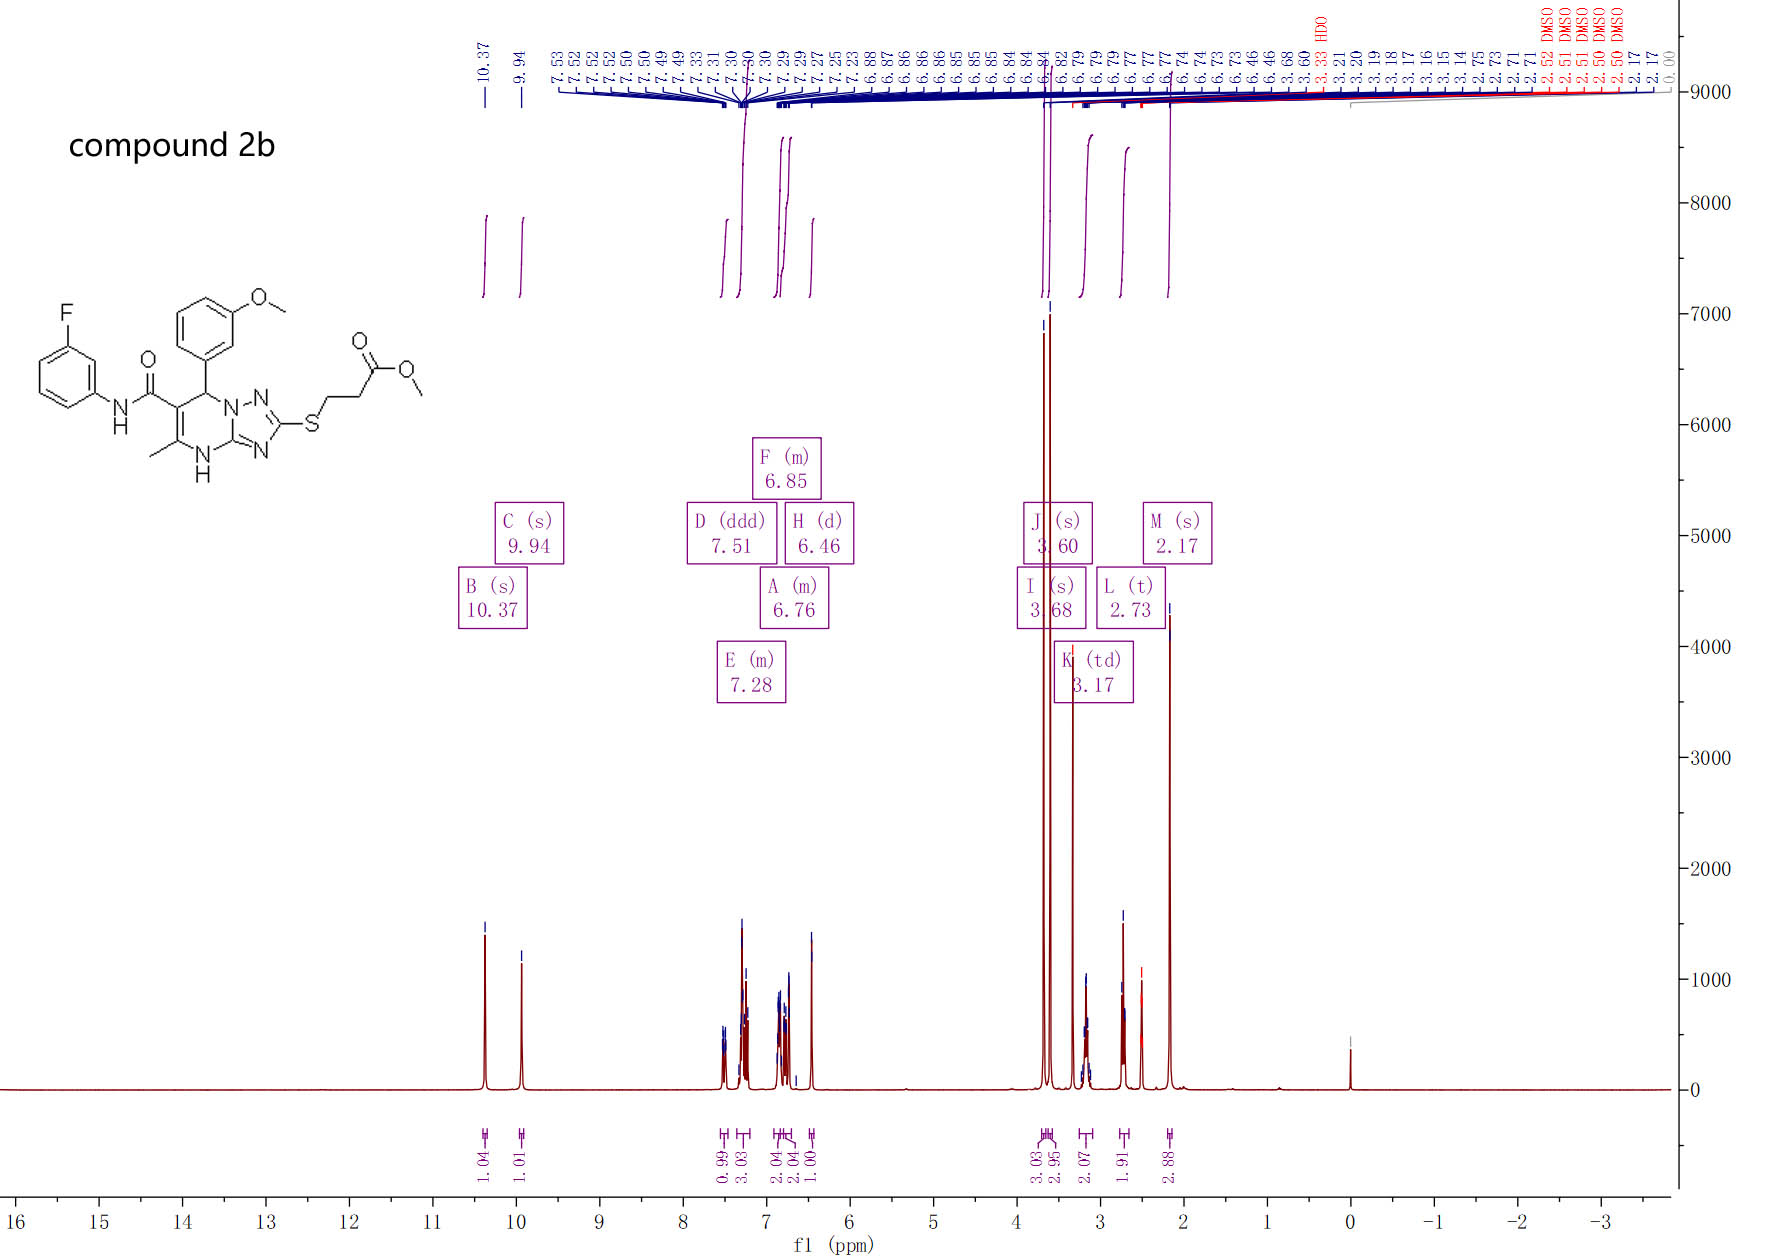


## 1H-NMR spectra of compound 2b


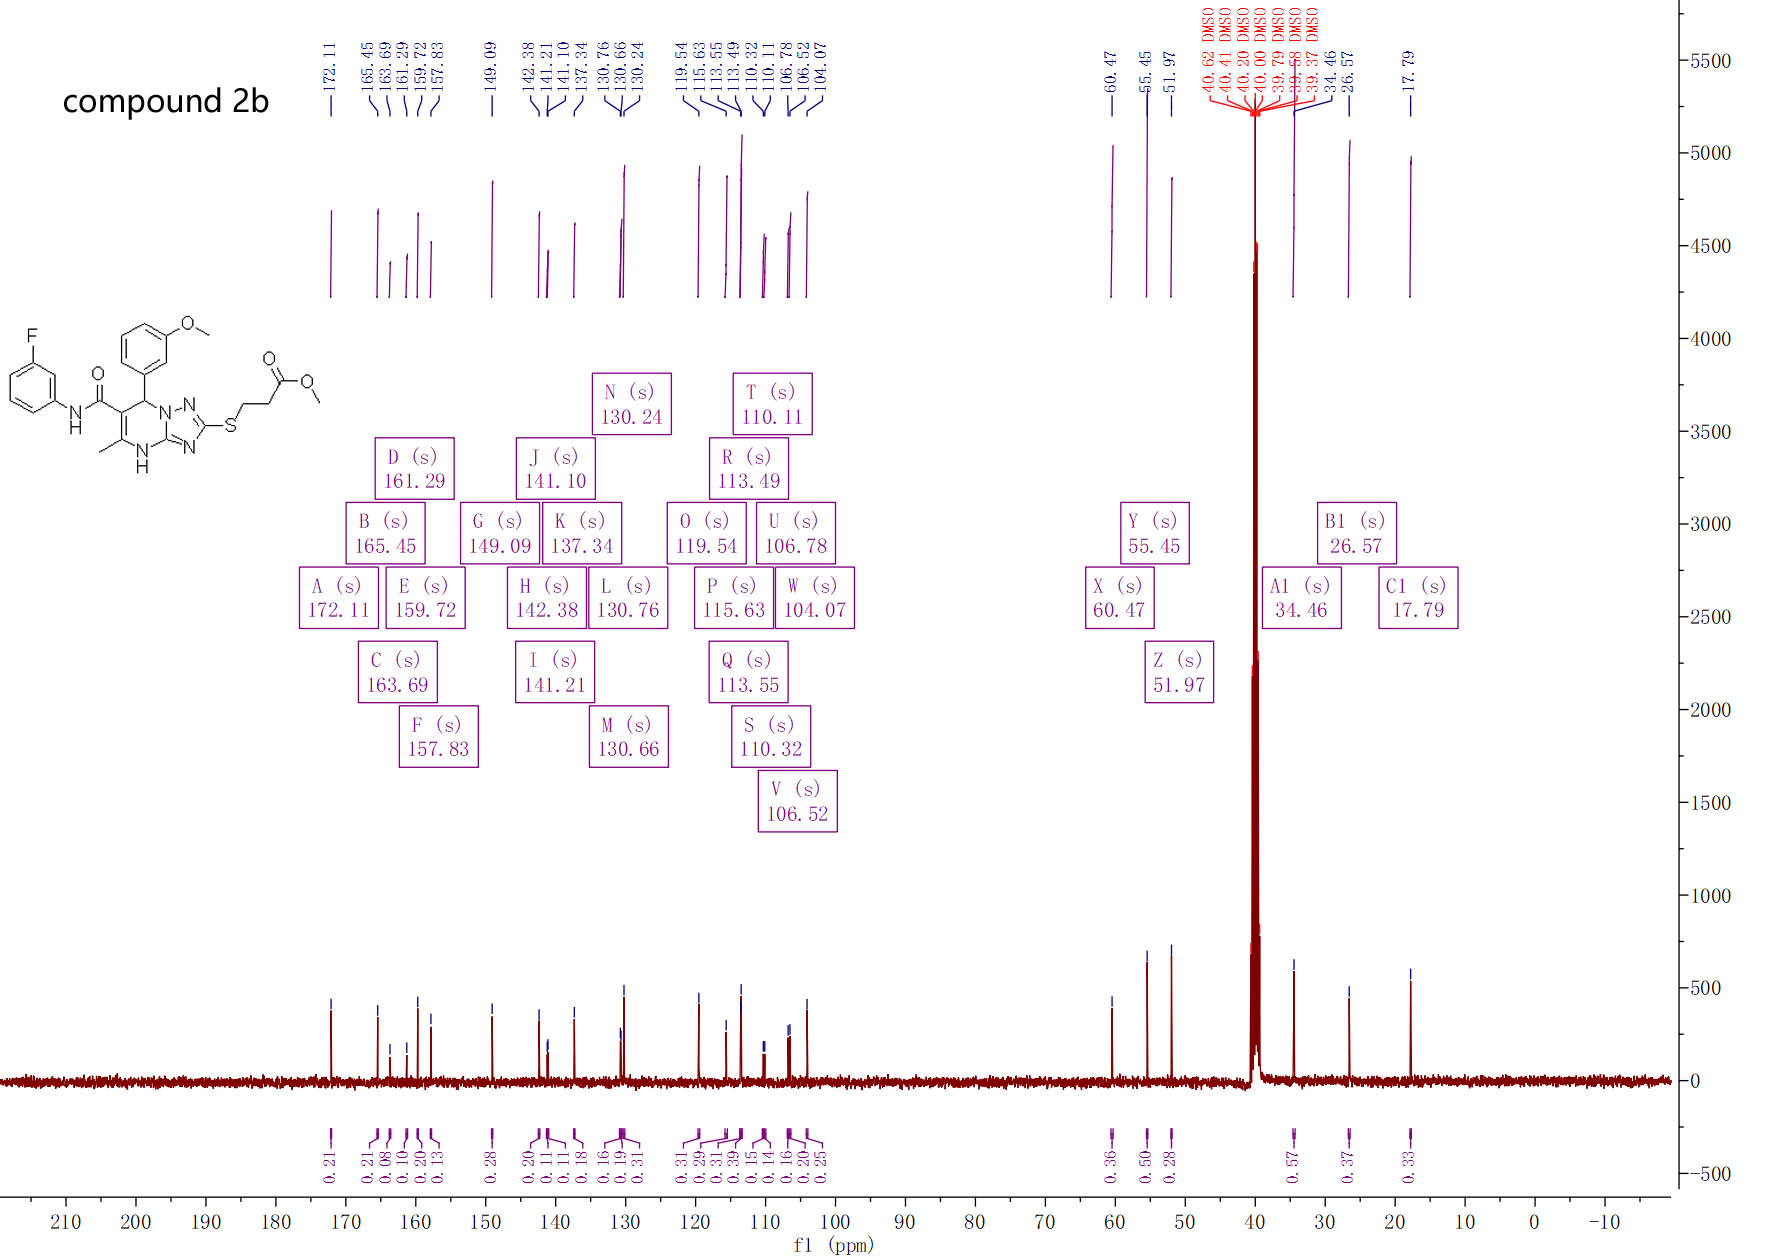


## 13C-NMR spectra of compound 2b


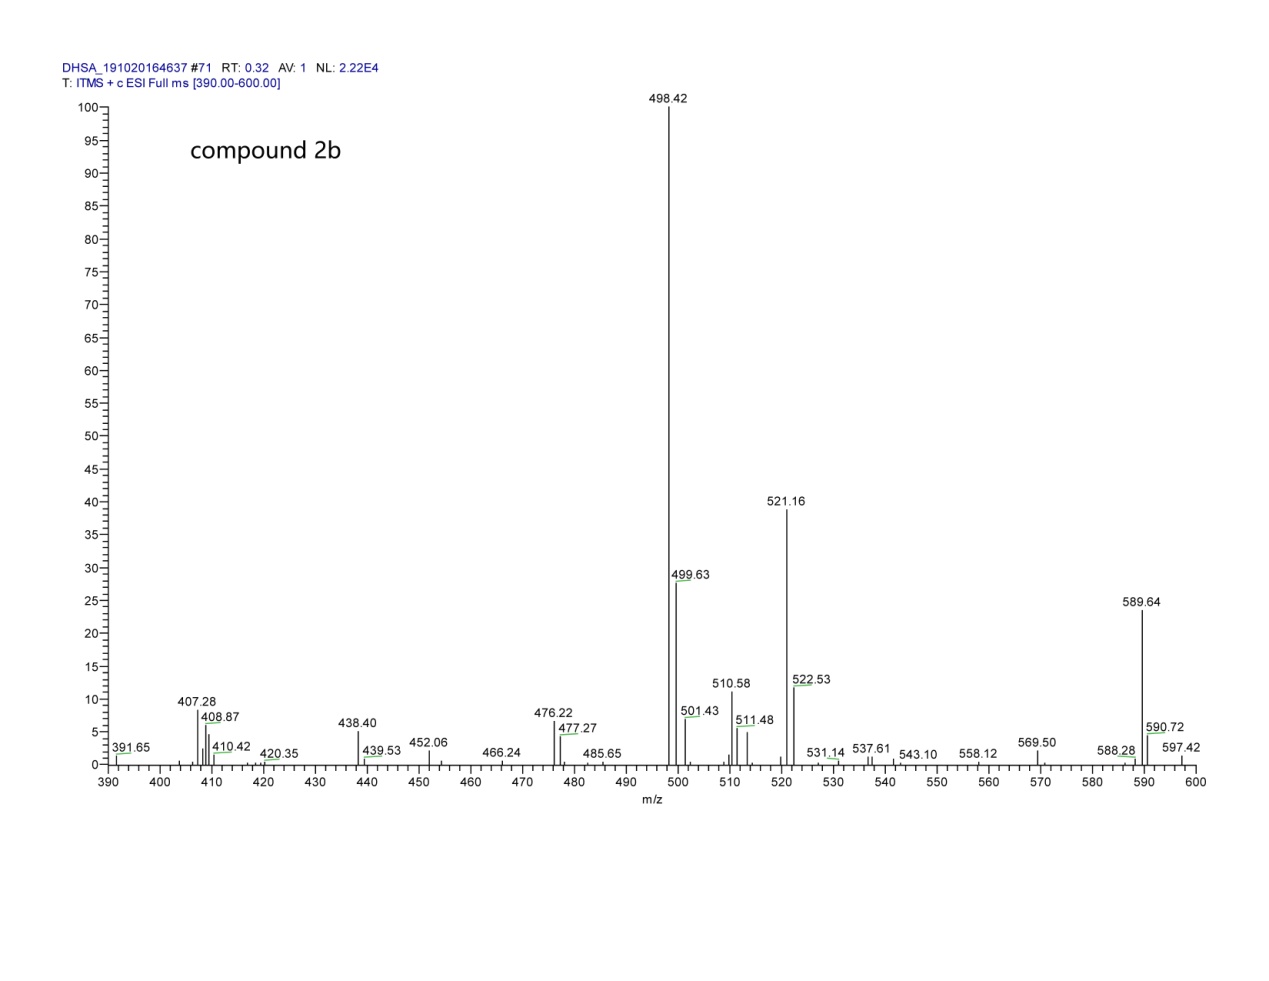


## MS spectra of compound 2b


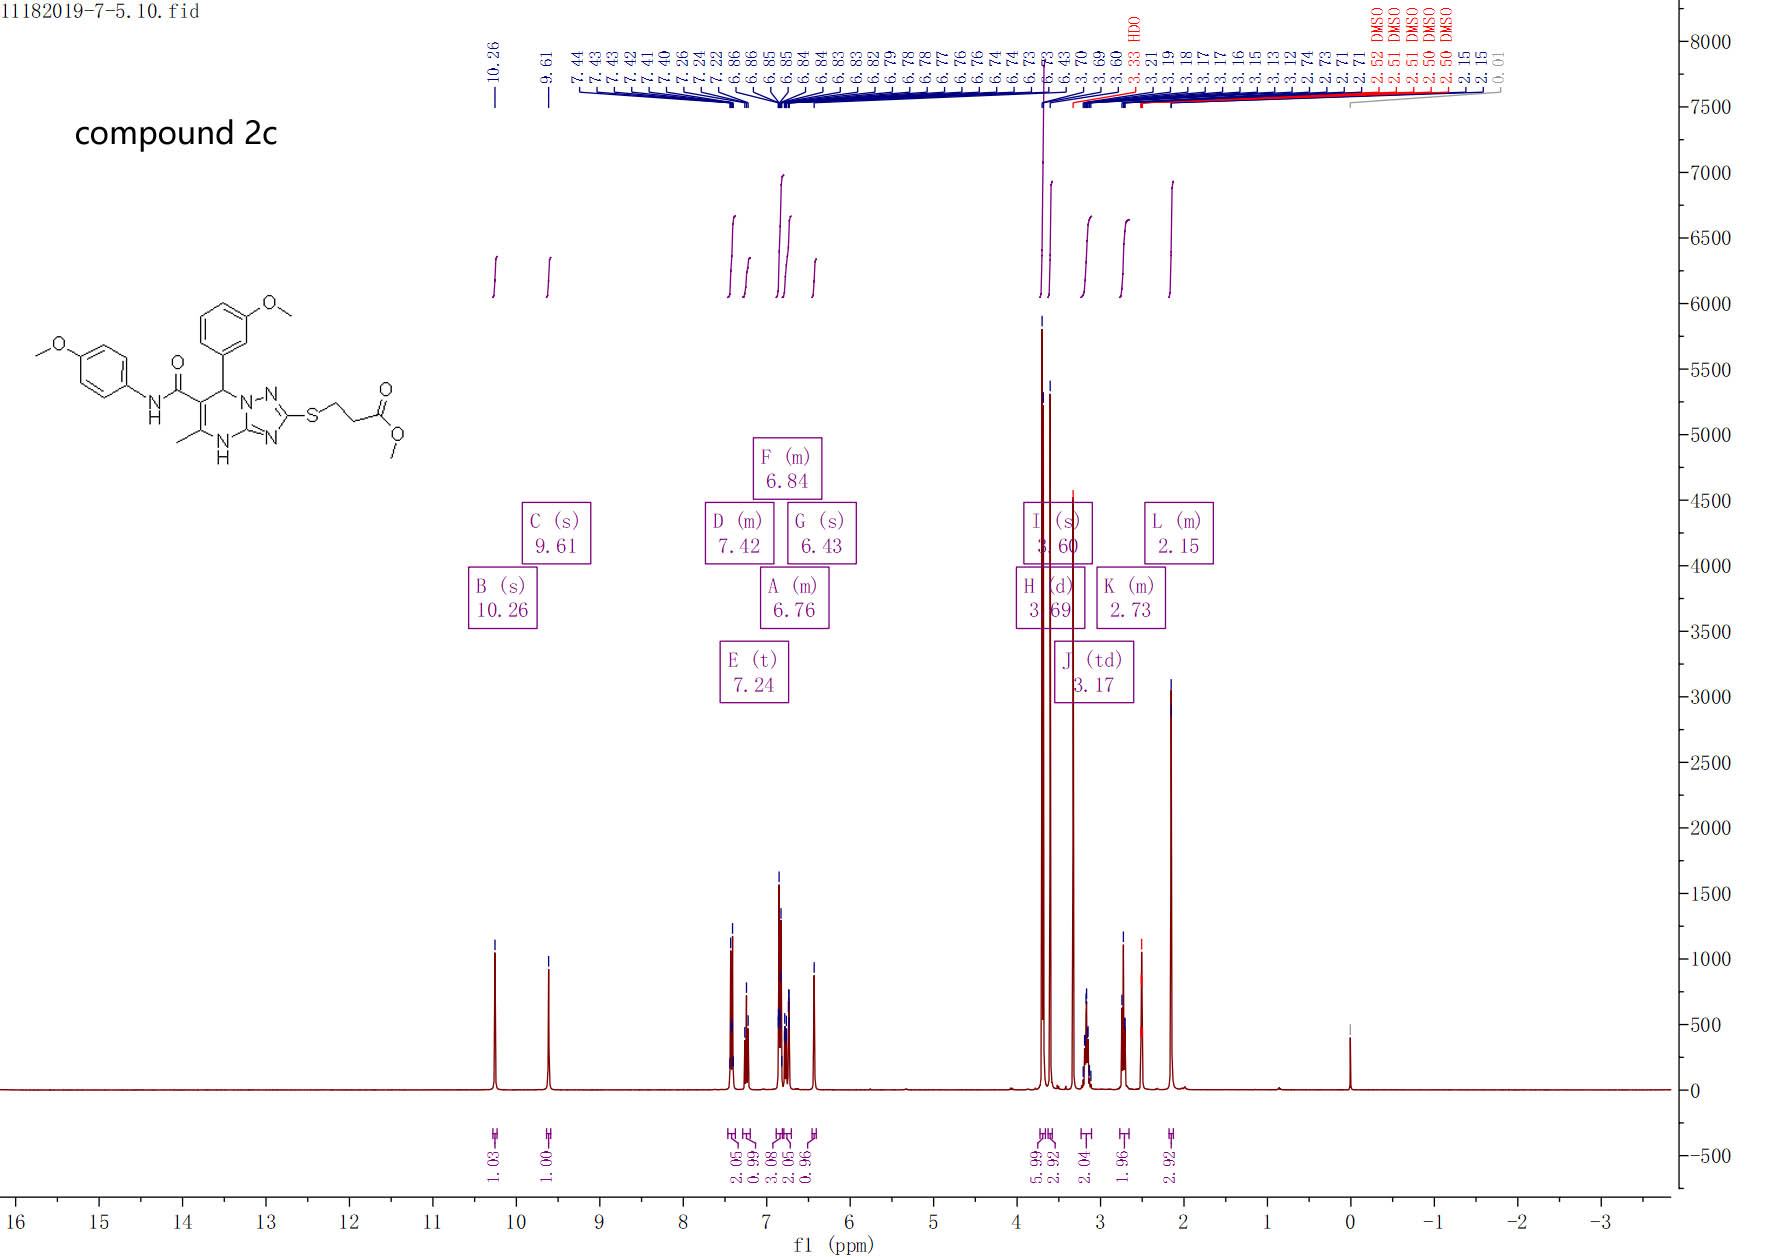


## 1H-NMR spectra of compound 2c


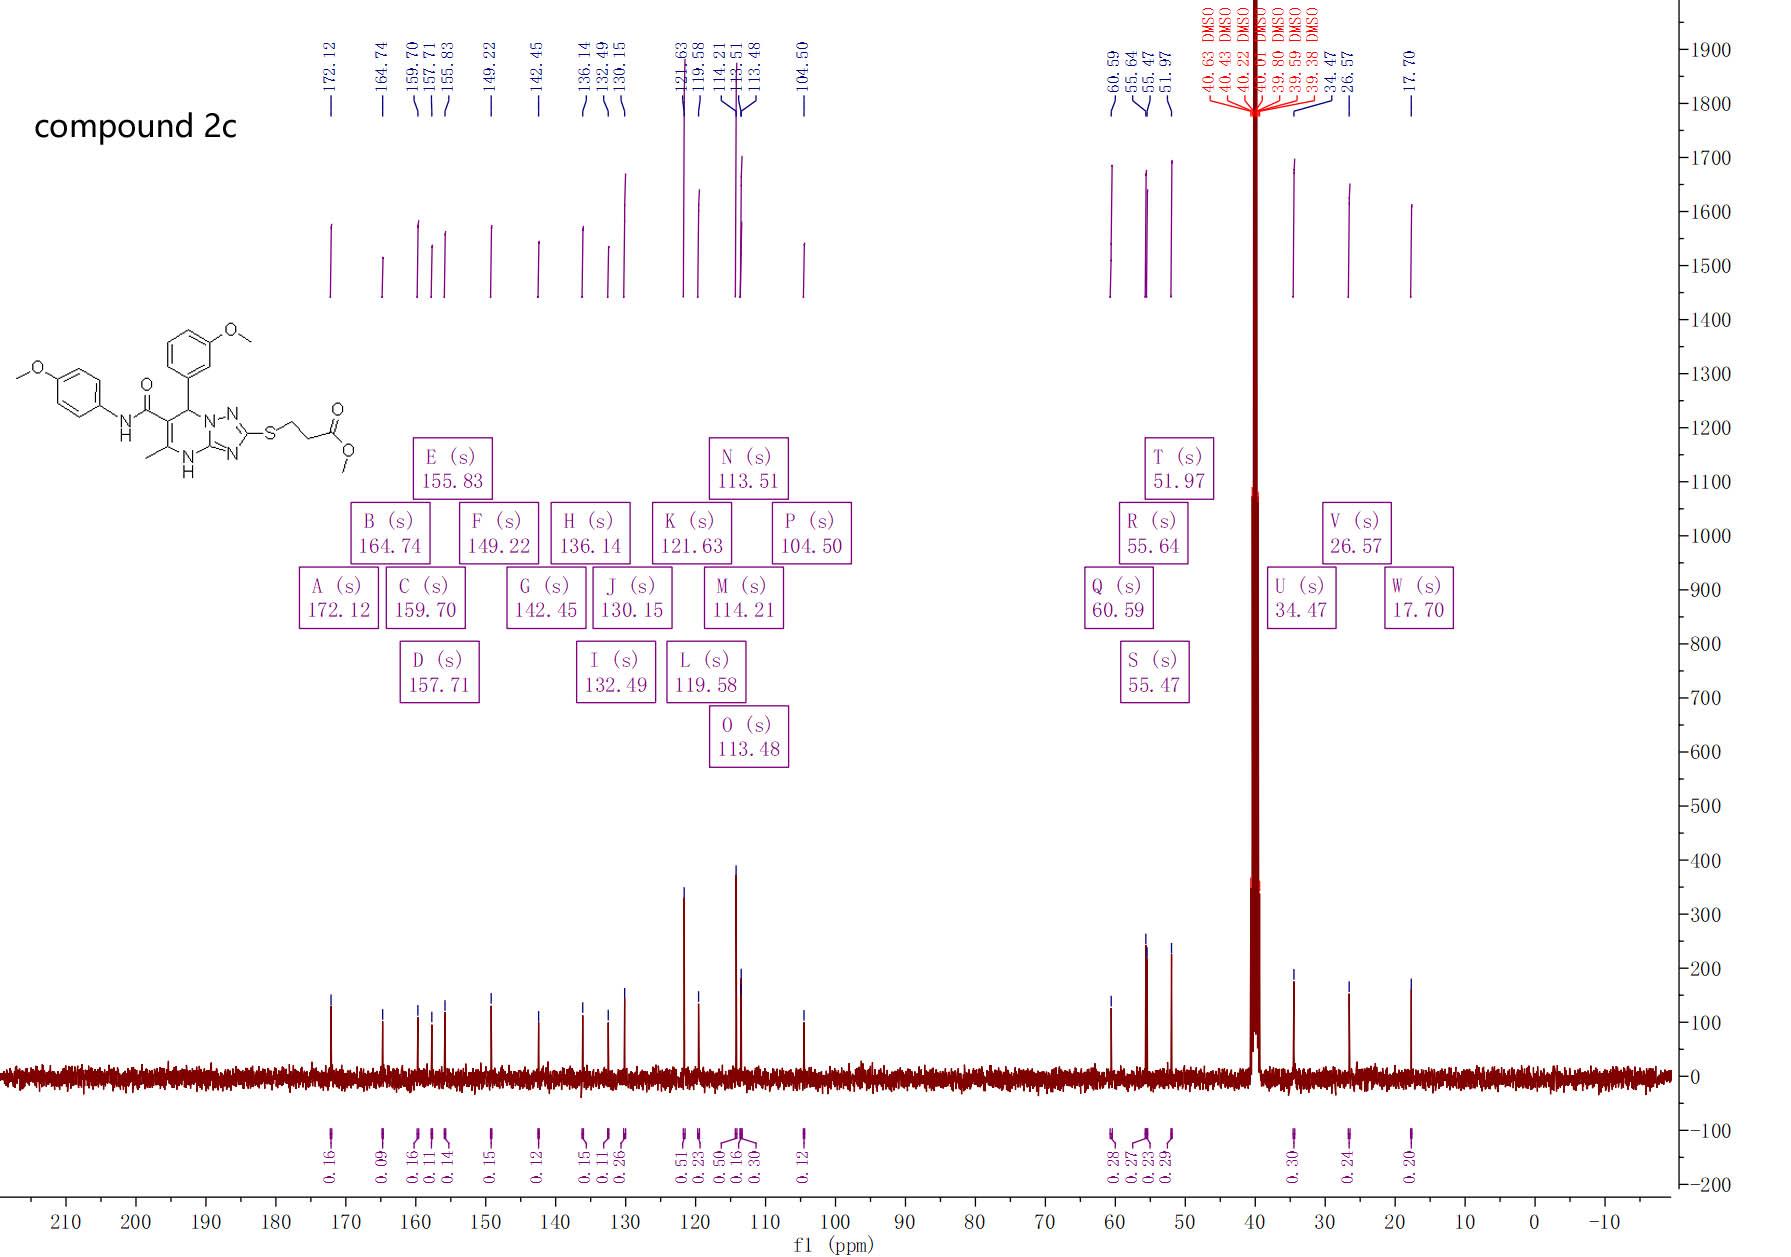


## 13C-NMR spectra of compound 2c


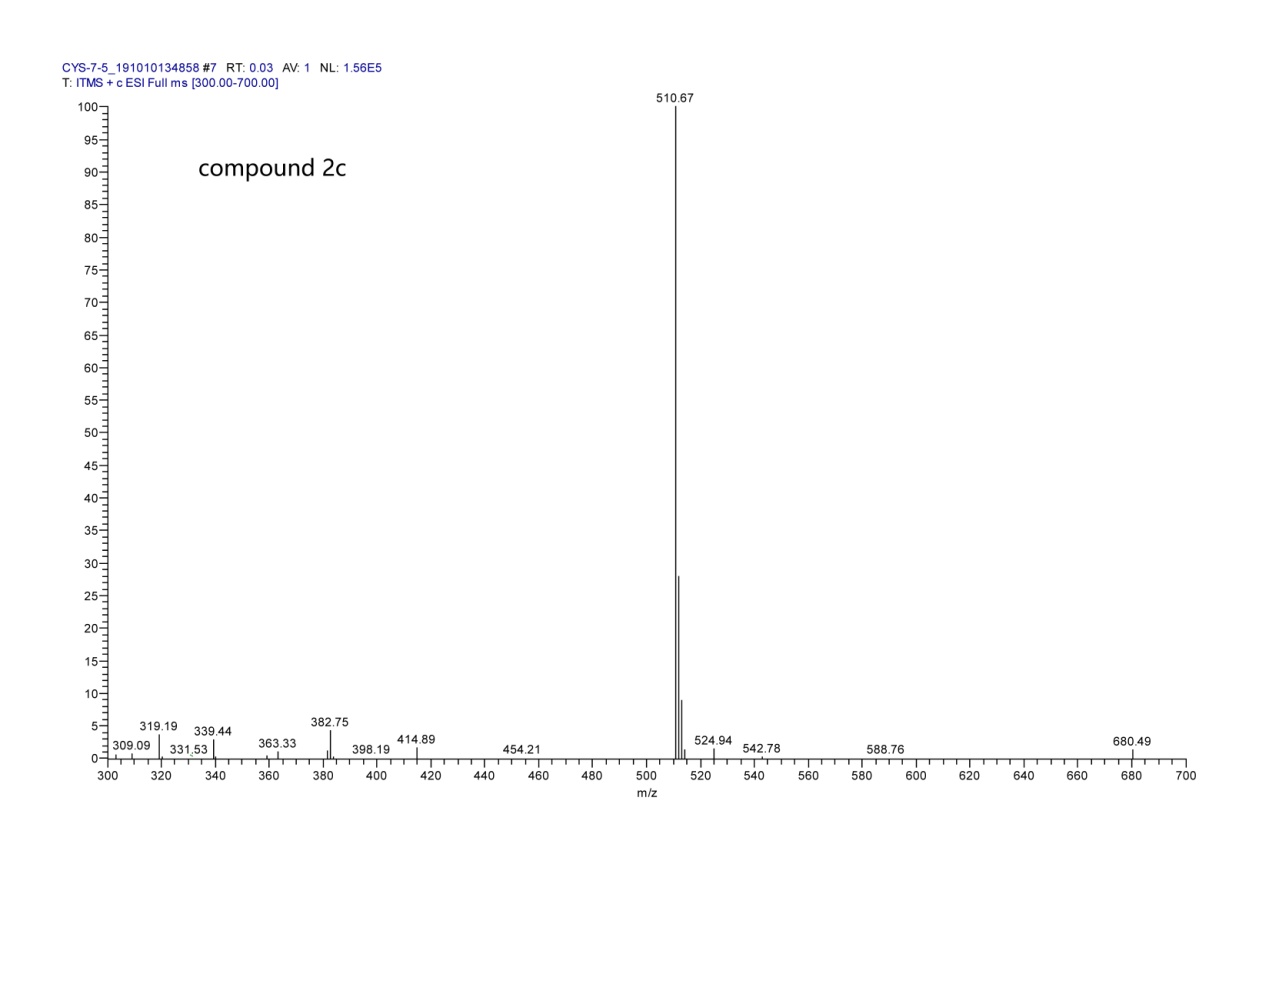


## MS spectra of compound 2c


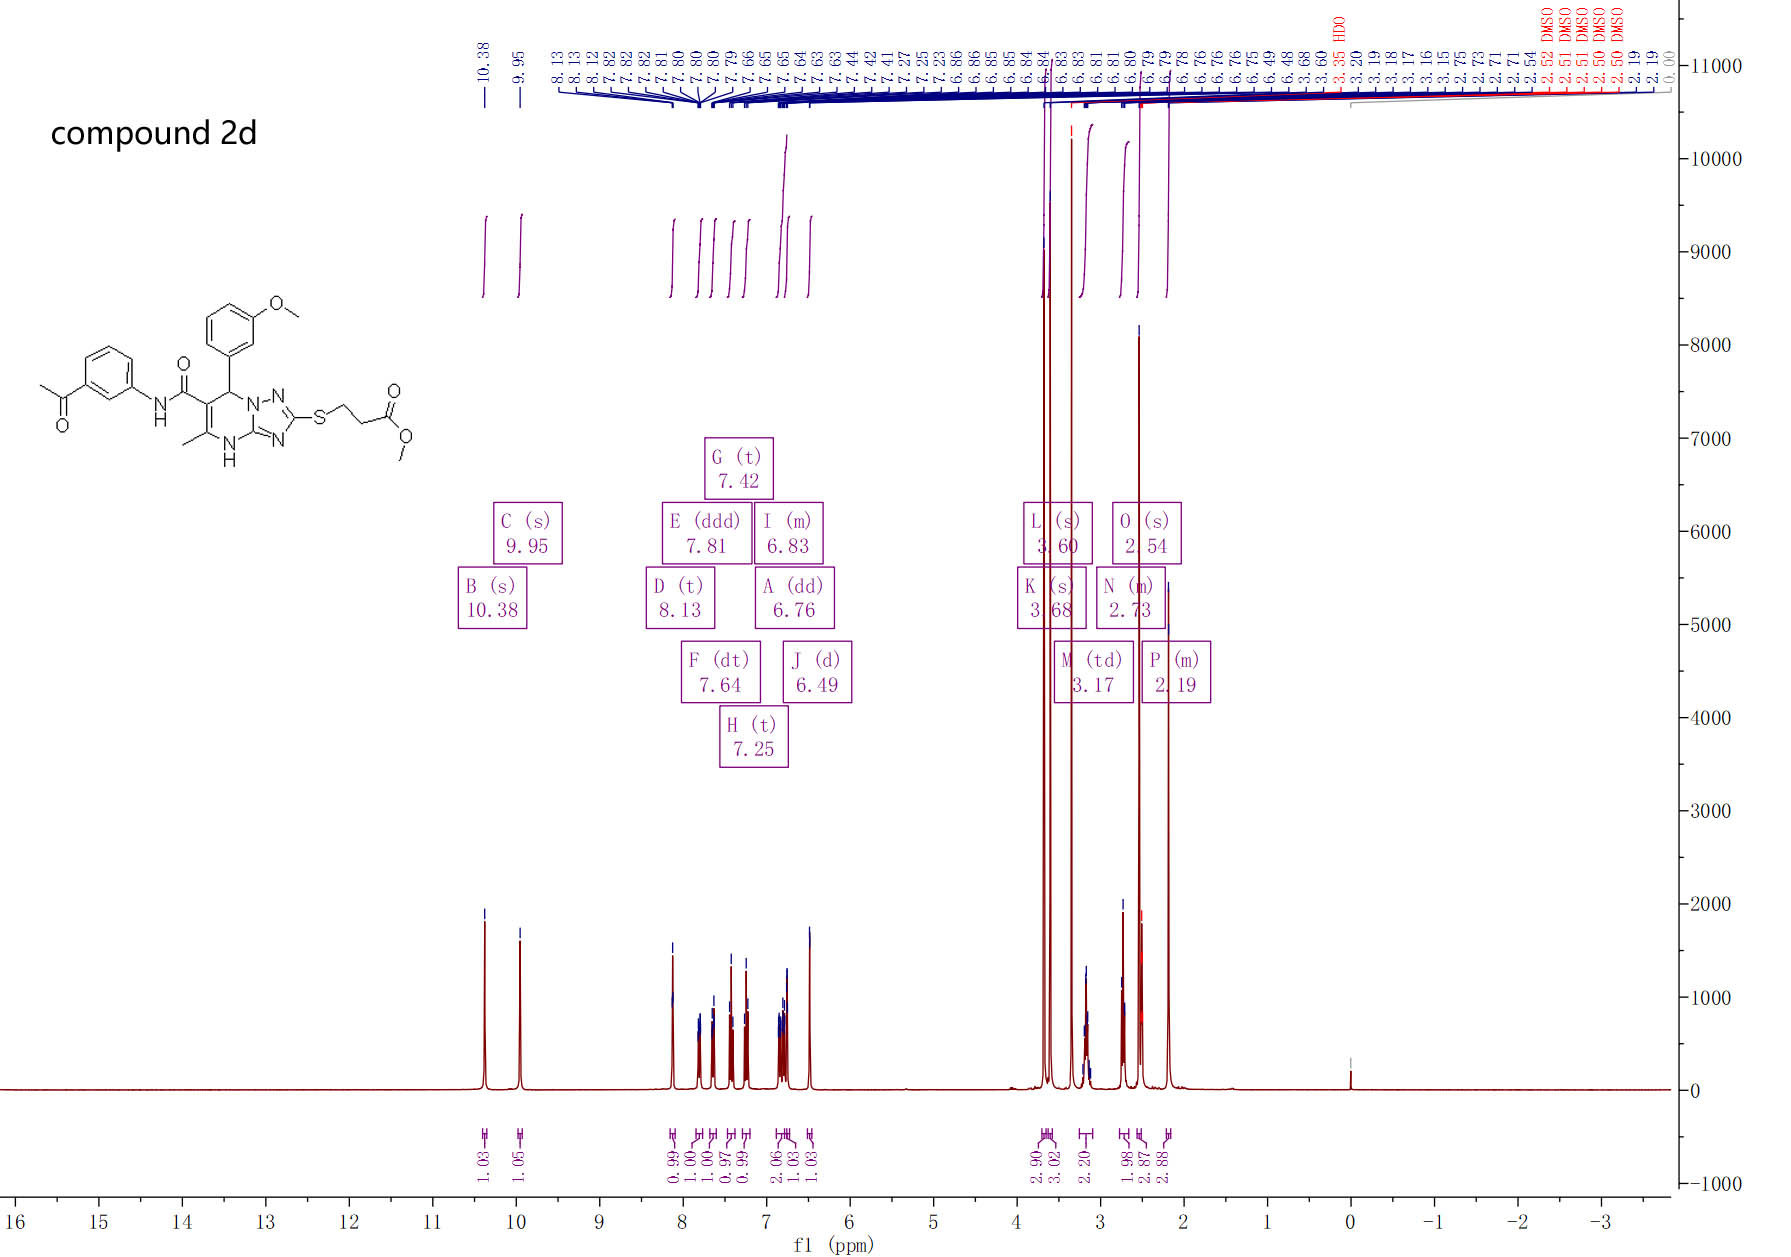


## 1H-NMR spectra of compound 2d


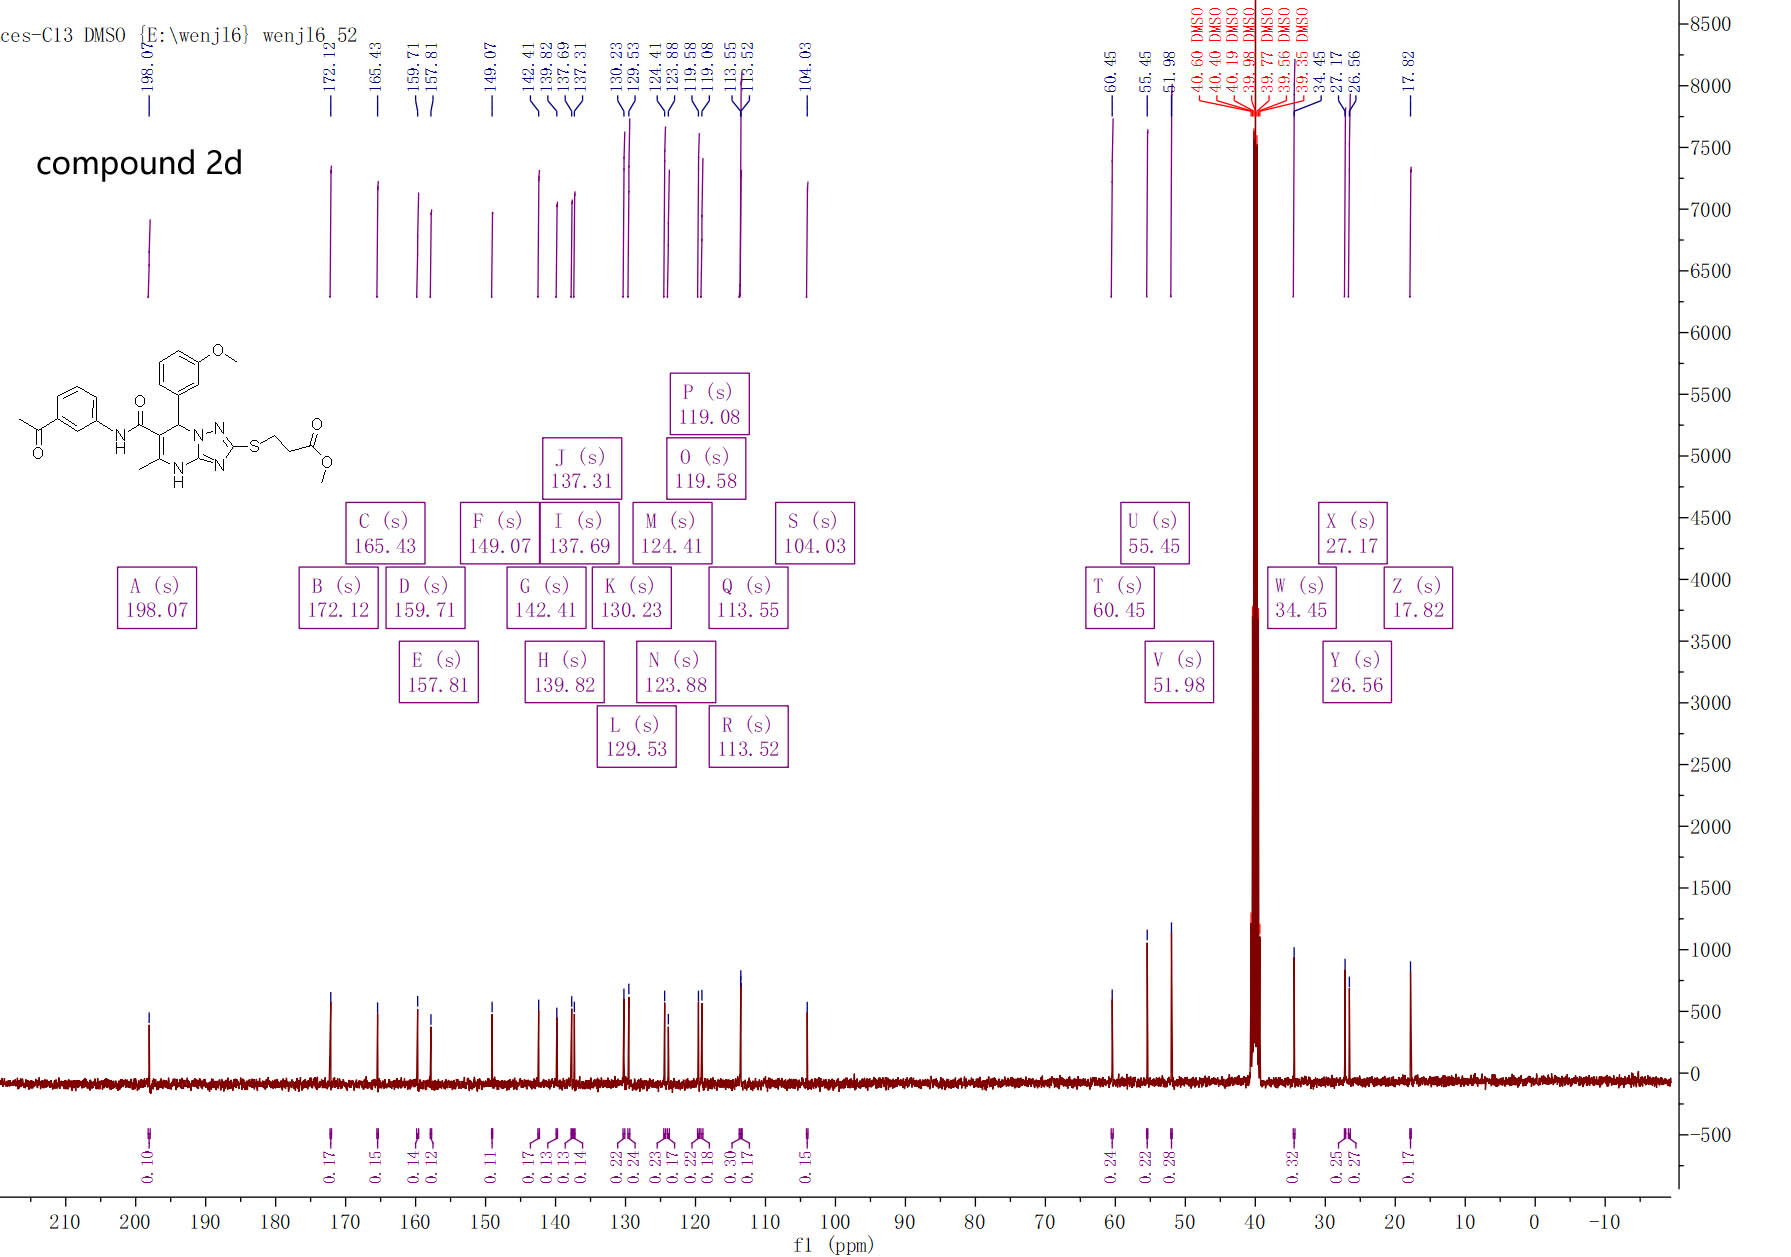


## 13C-NMR spectra of compound 2d


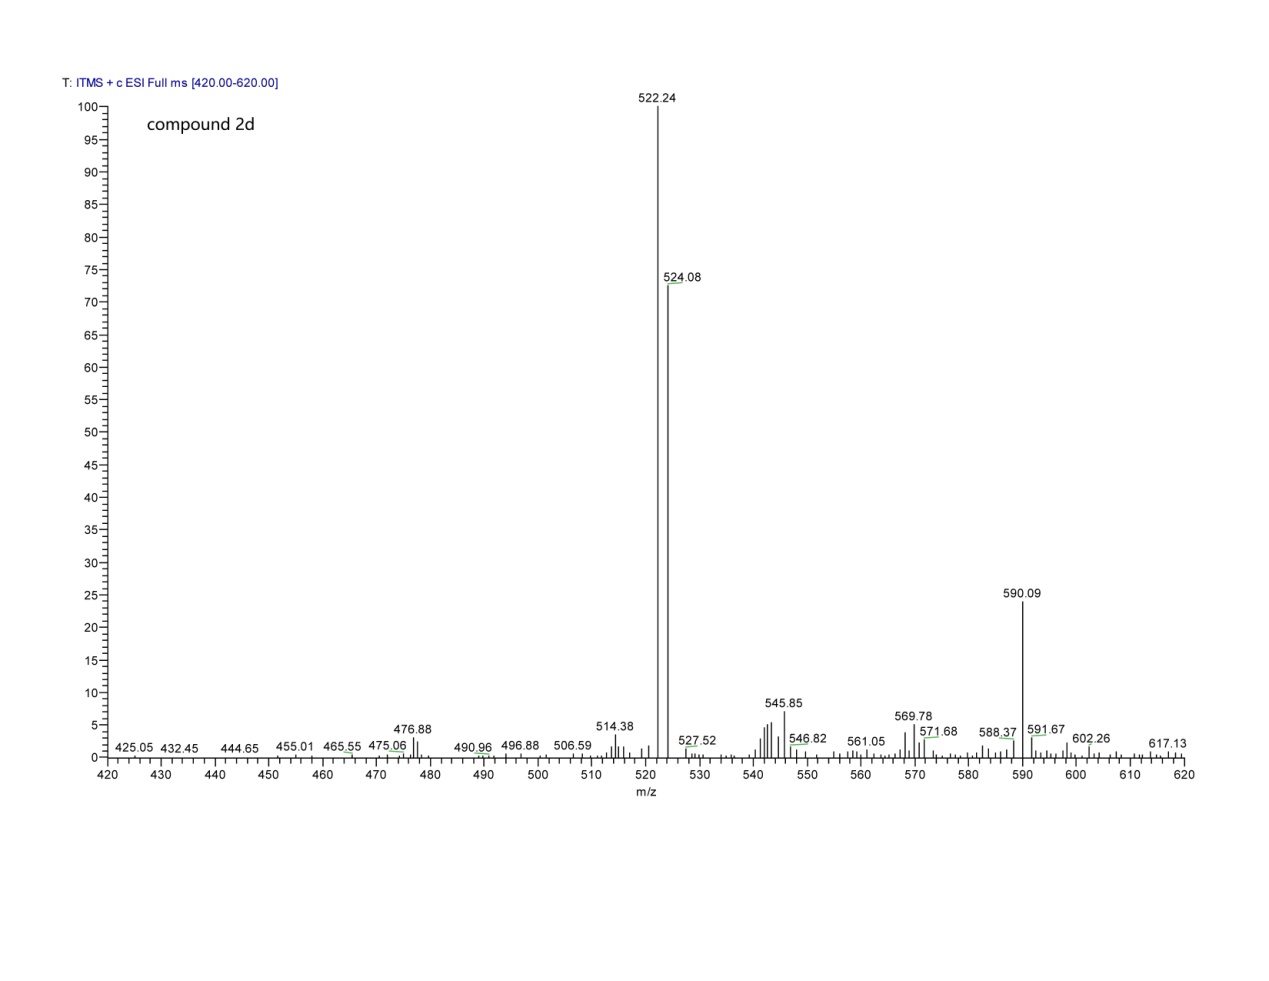


## MS spectra of compound 2d


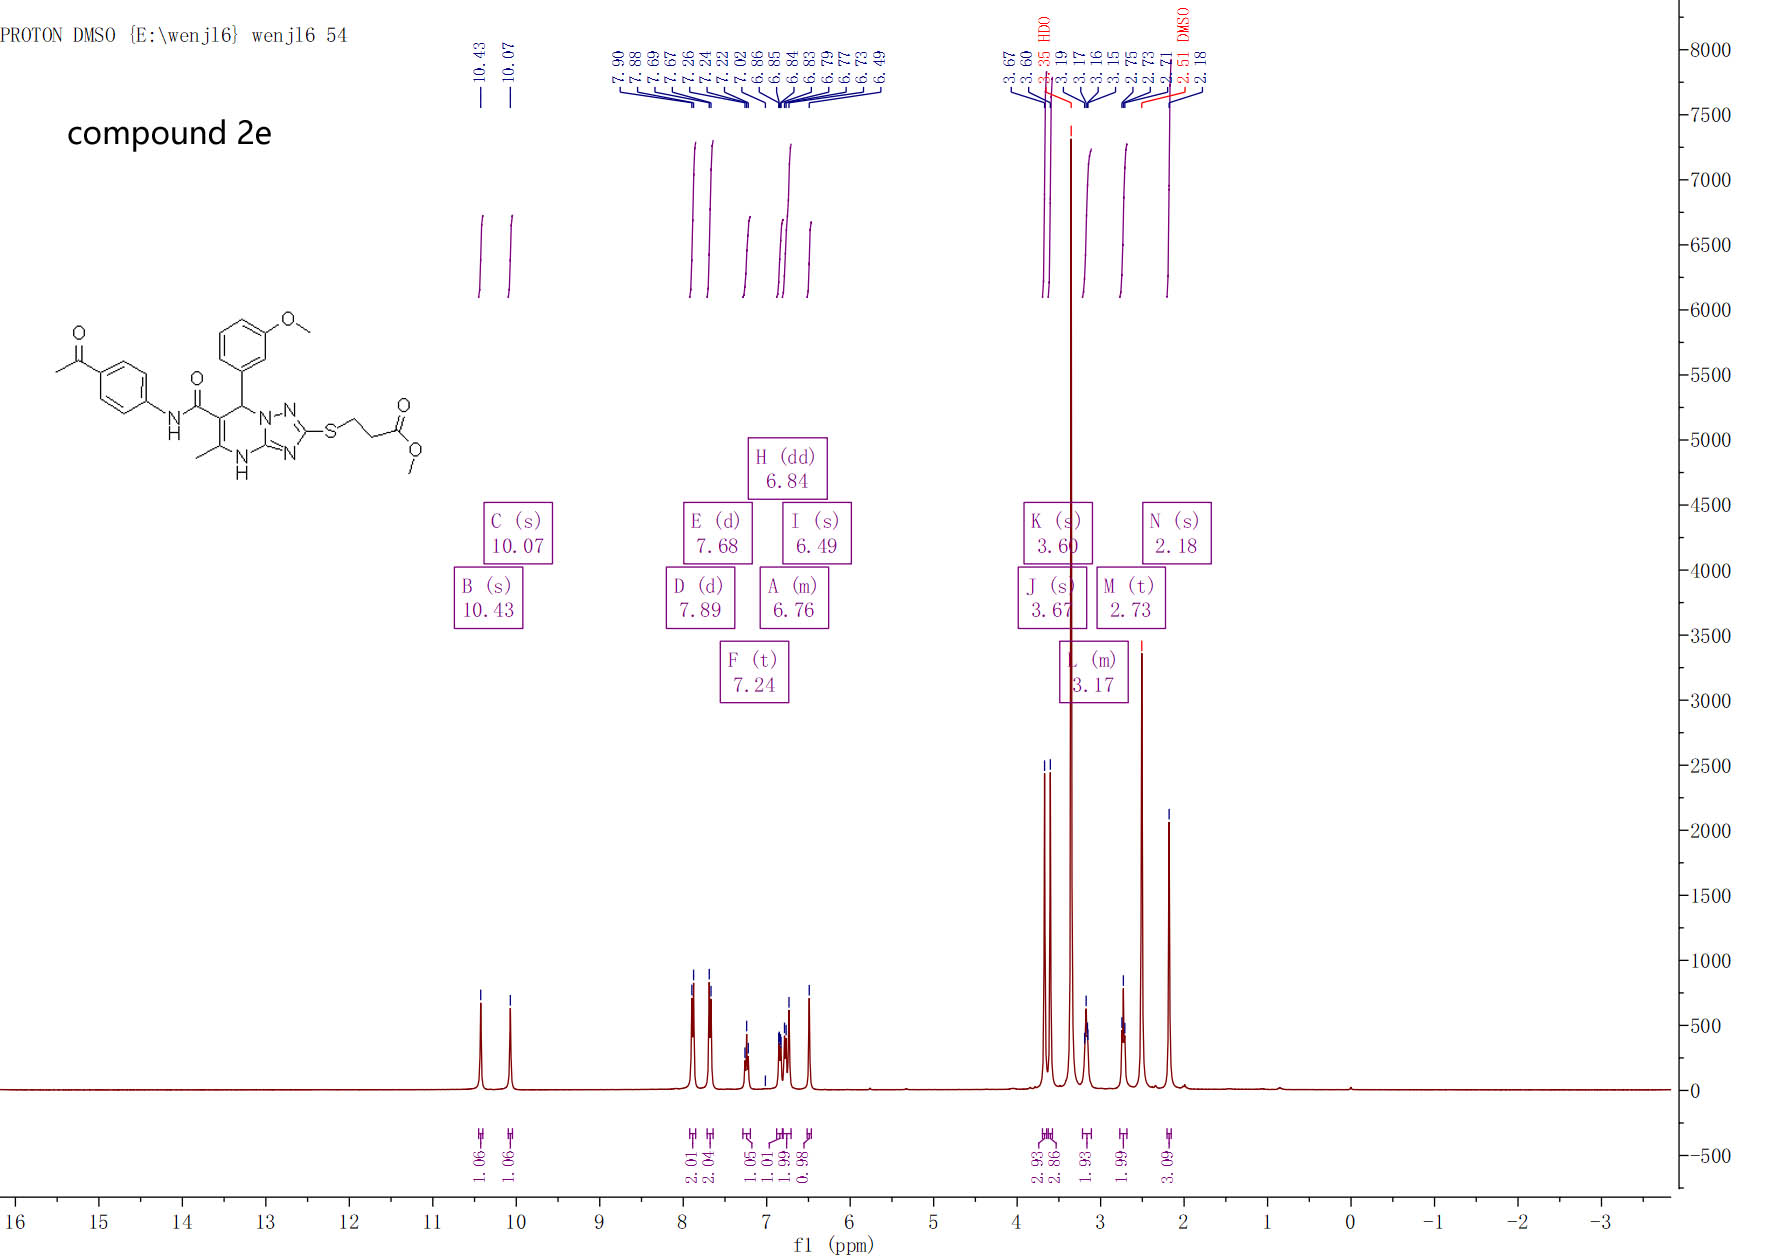


## 1H-NMR spectra of compound 2e


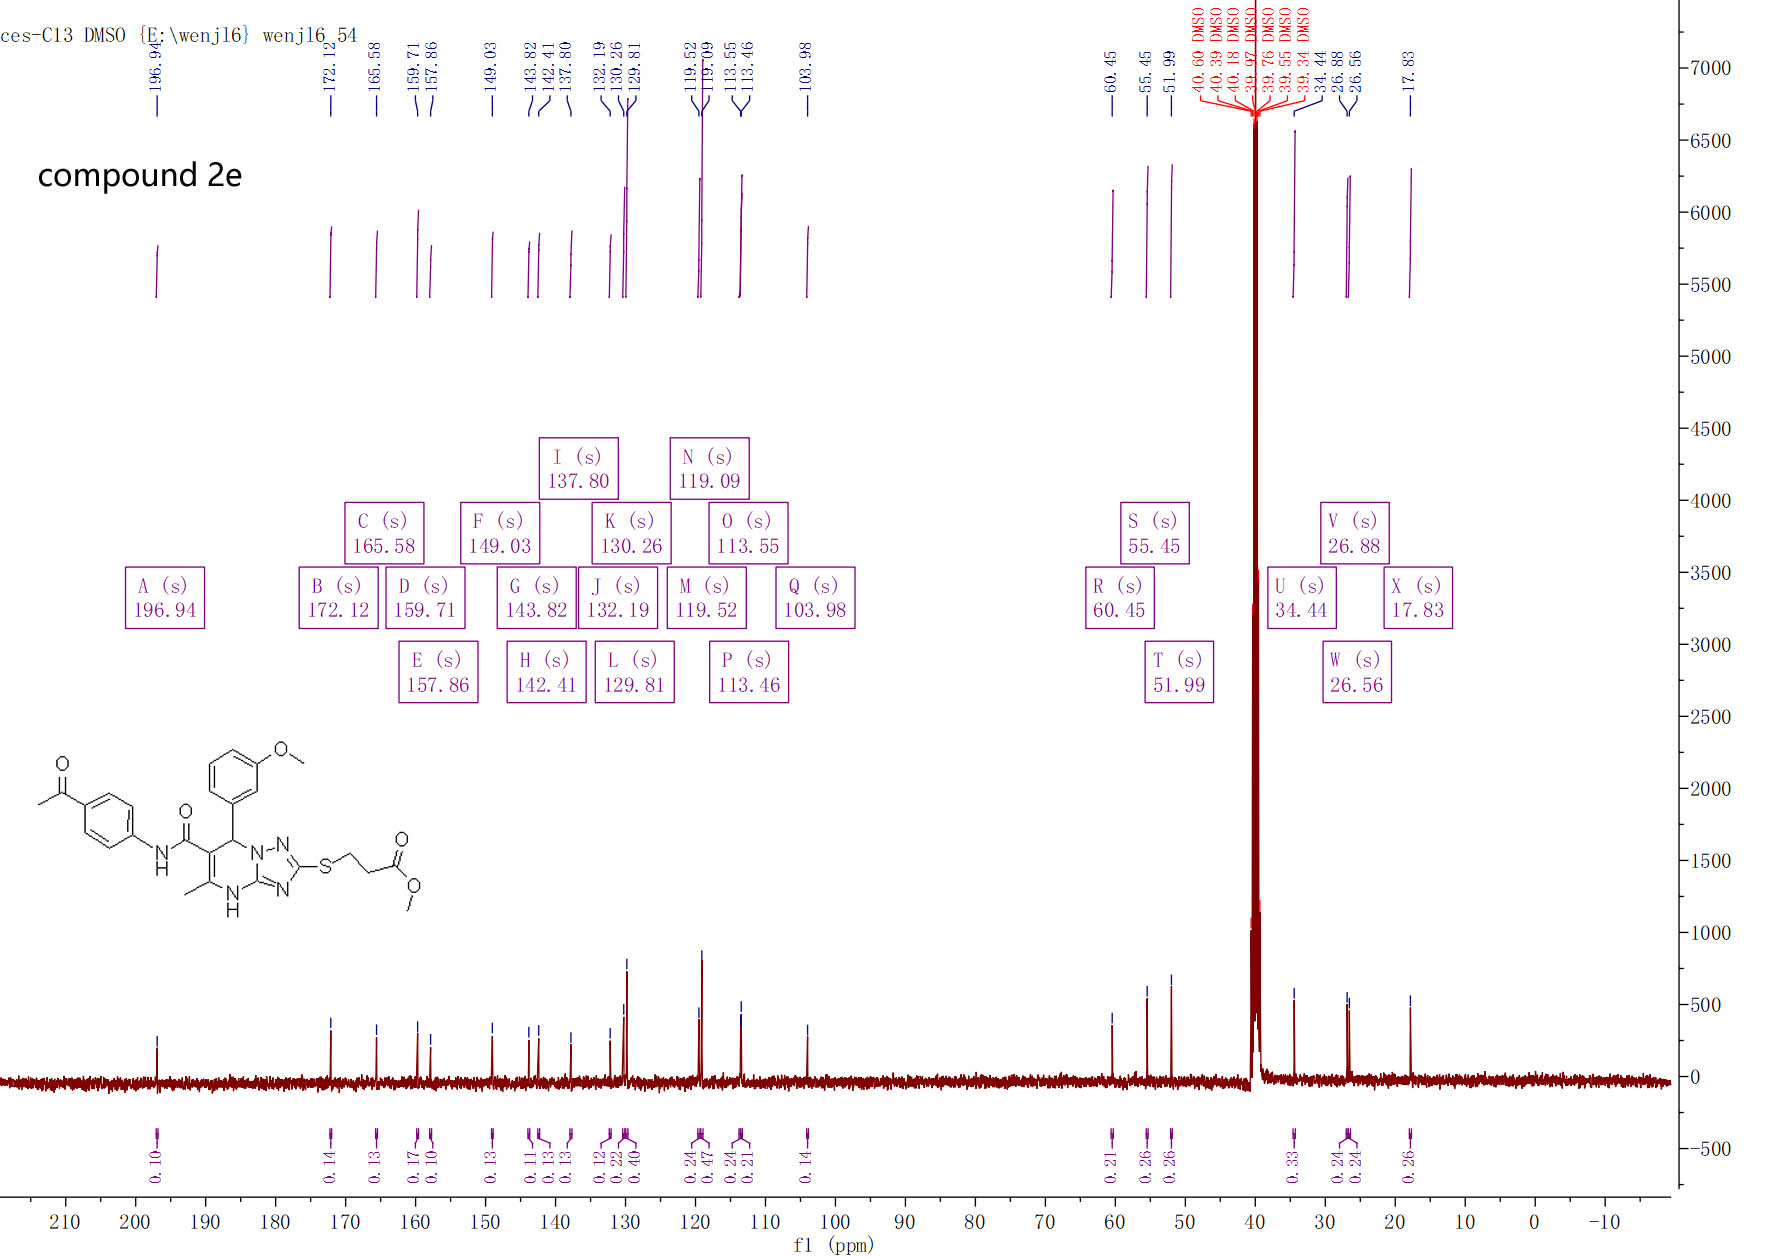


## 13C-NMR spectra of compound 2e


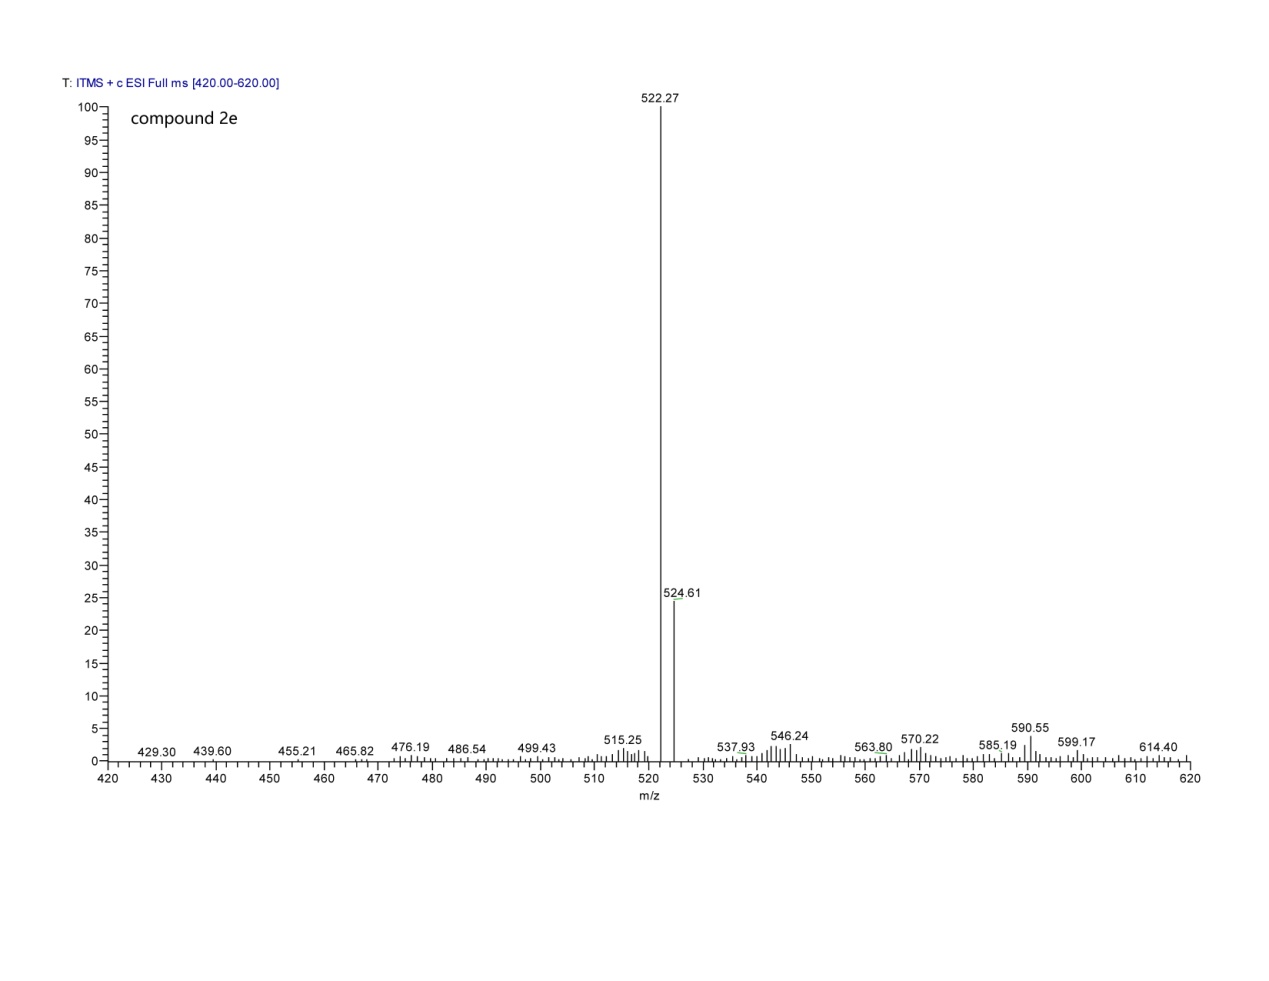


## MS spectra of compound 2e


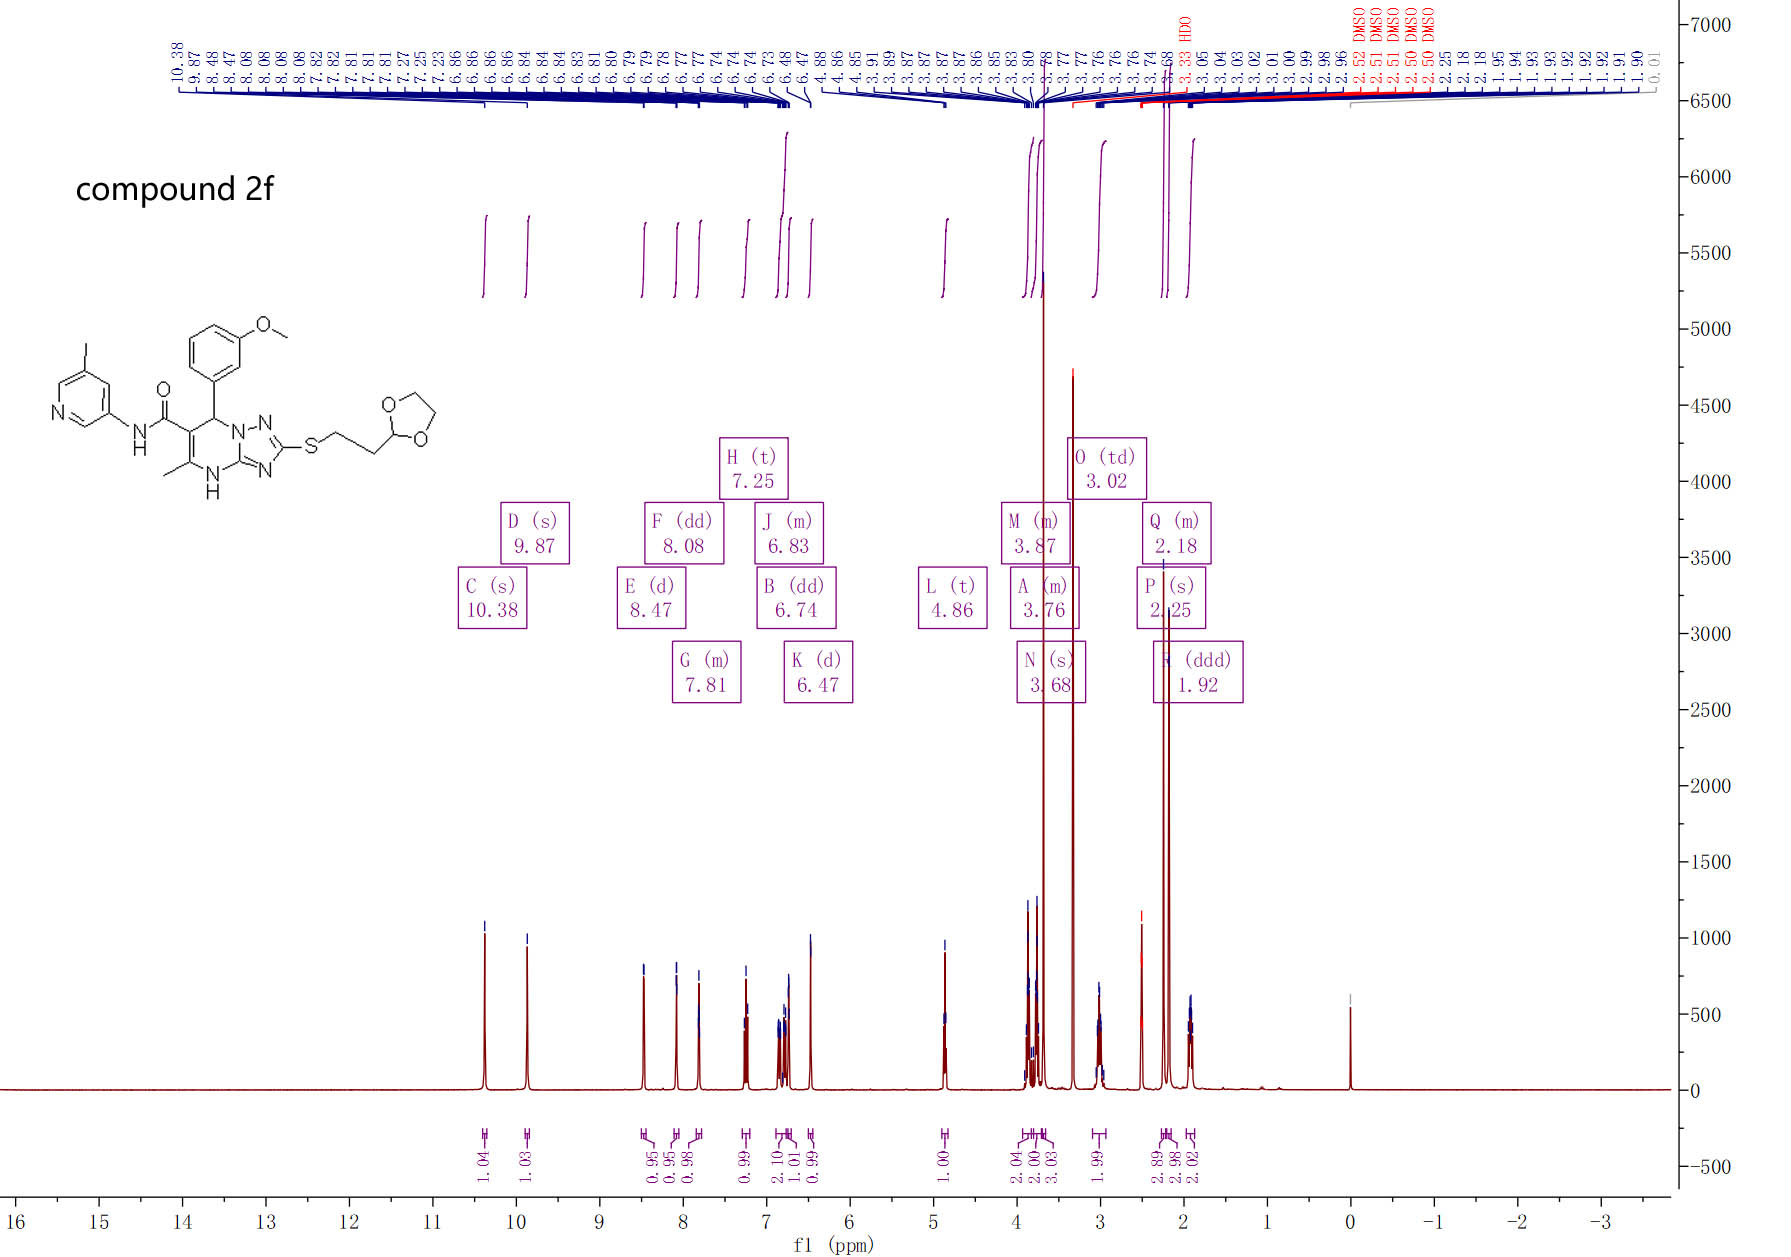


## 1H-NMR spectra of compound 2f


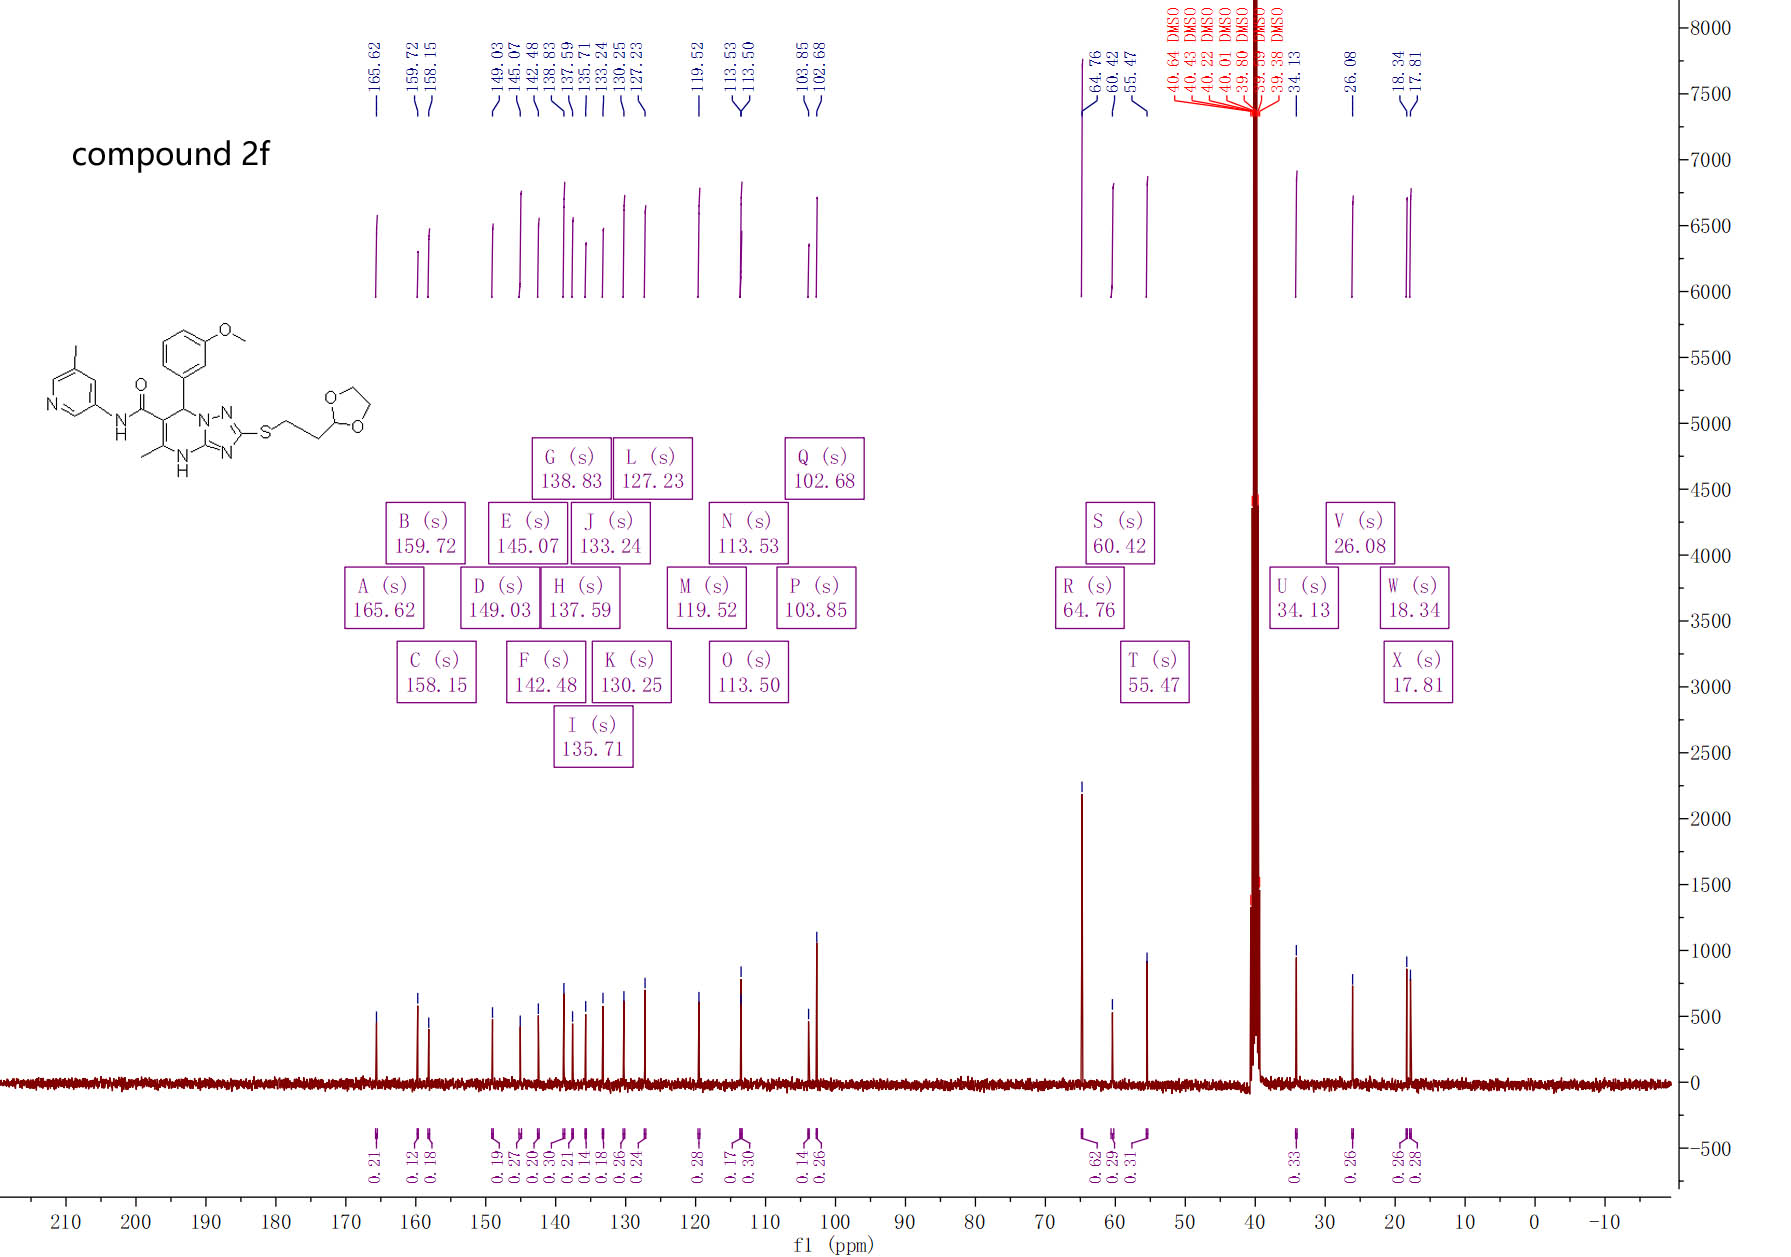


## 13C-NMR spectra of compound 2f


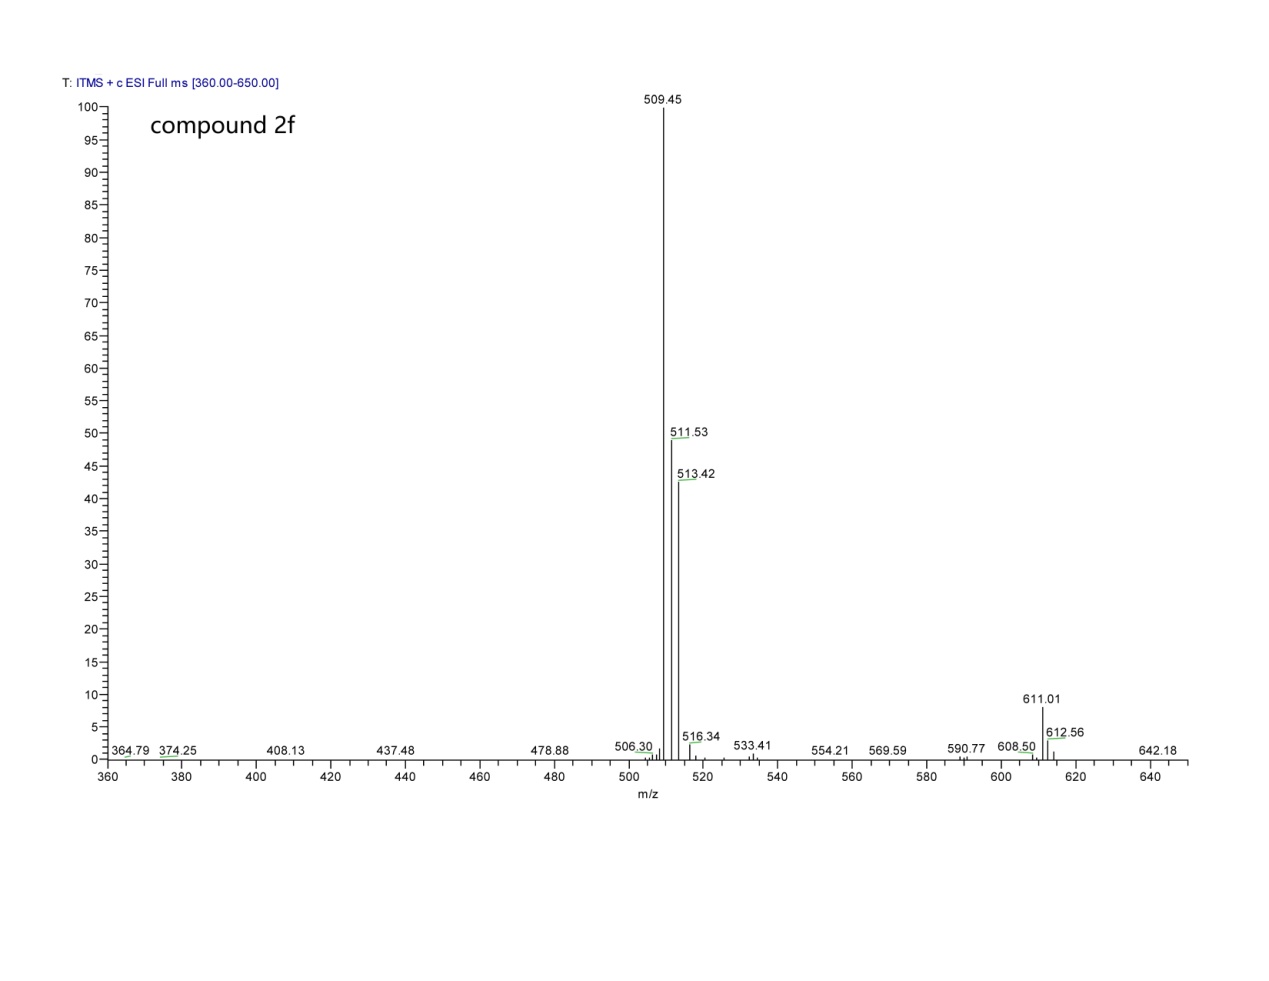


## MS spectra of compound 2f


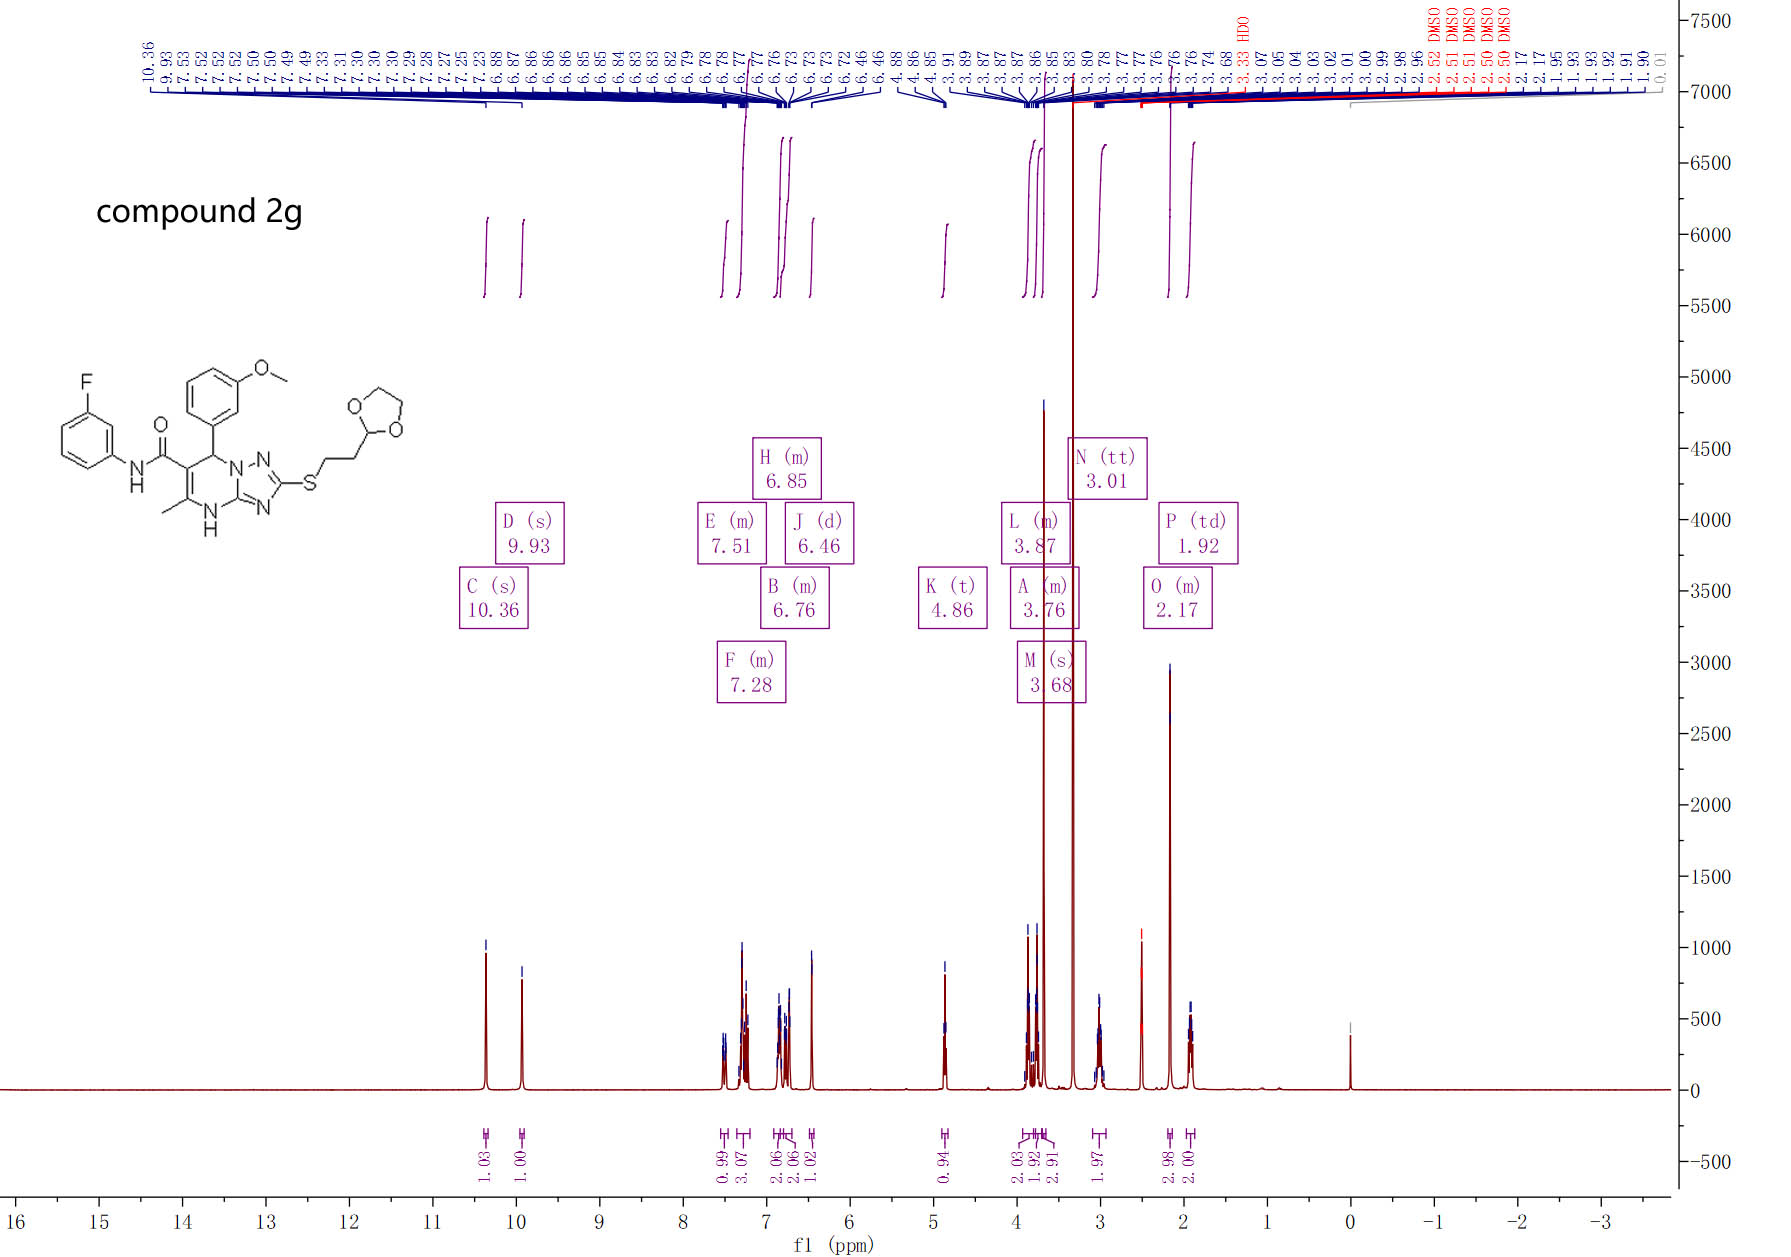


## 1H-NMR spectra of compound 2g


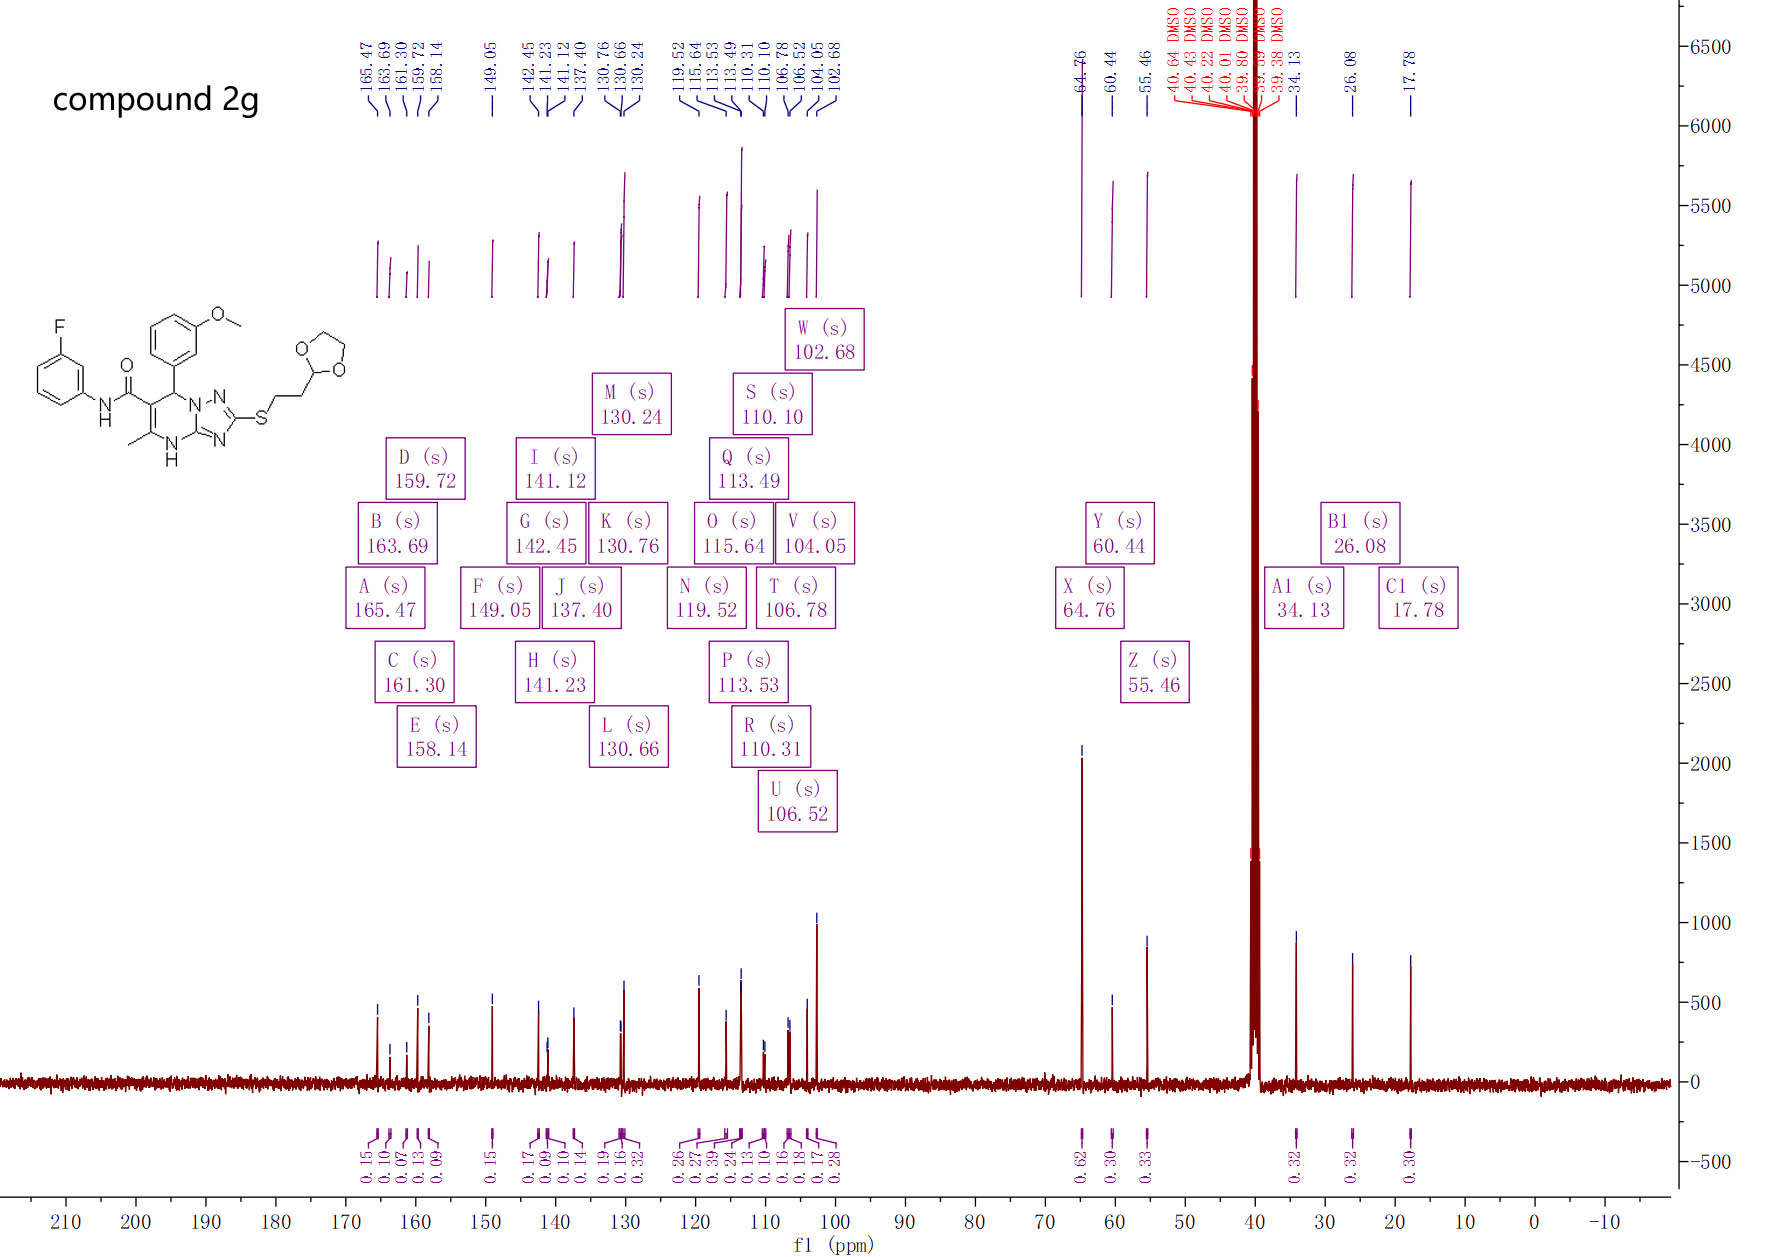


## 13C-NMR spectra of compound 2g


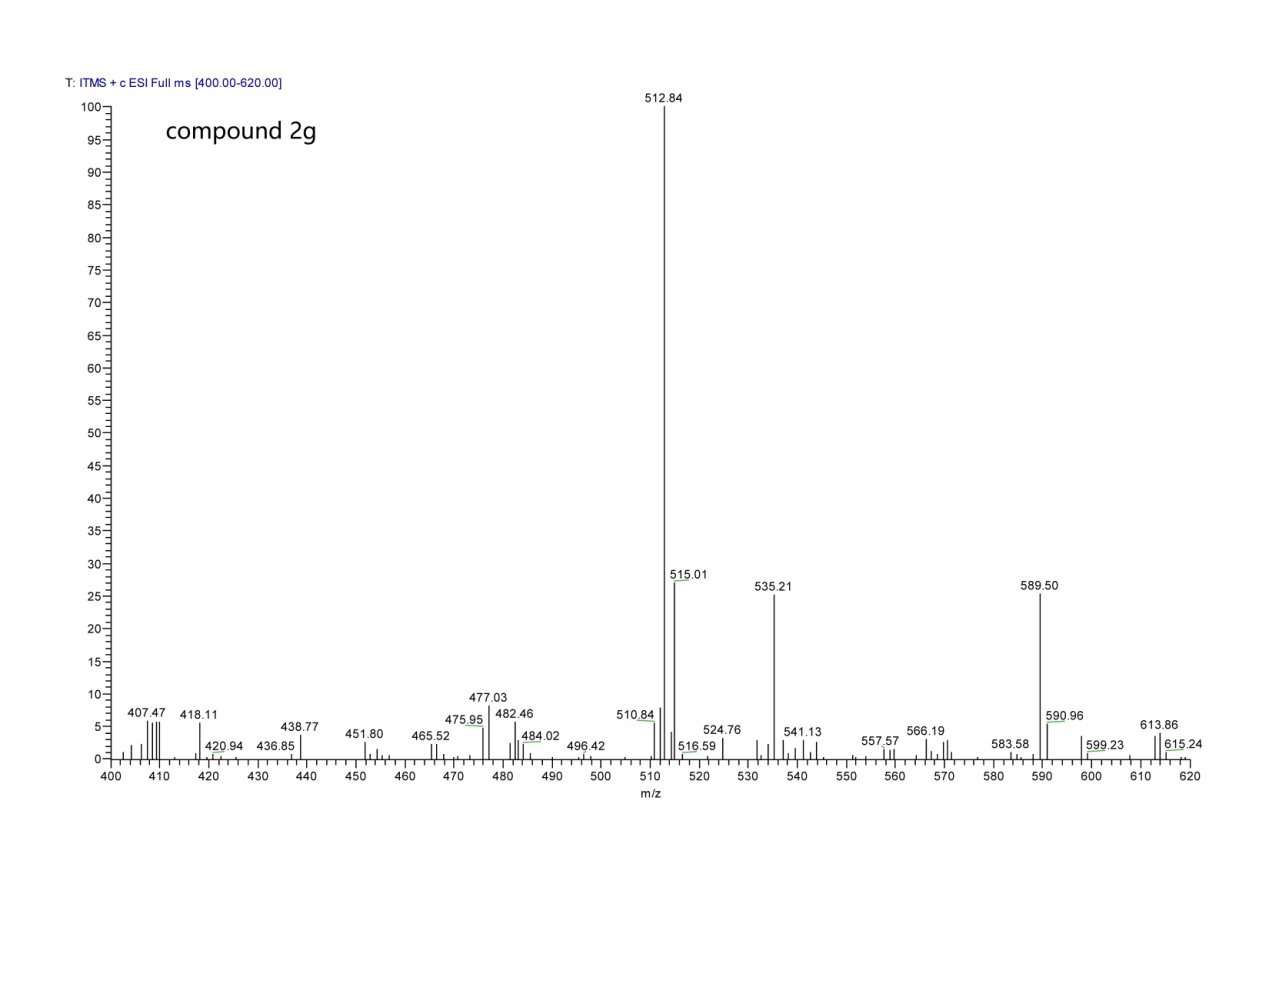


## MS spectra of compound 2g


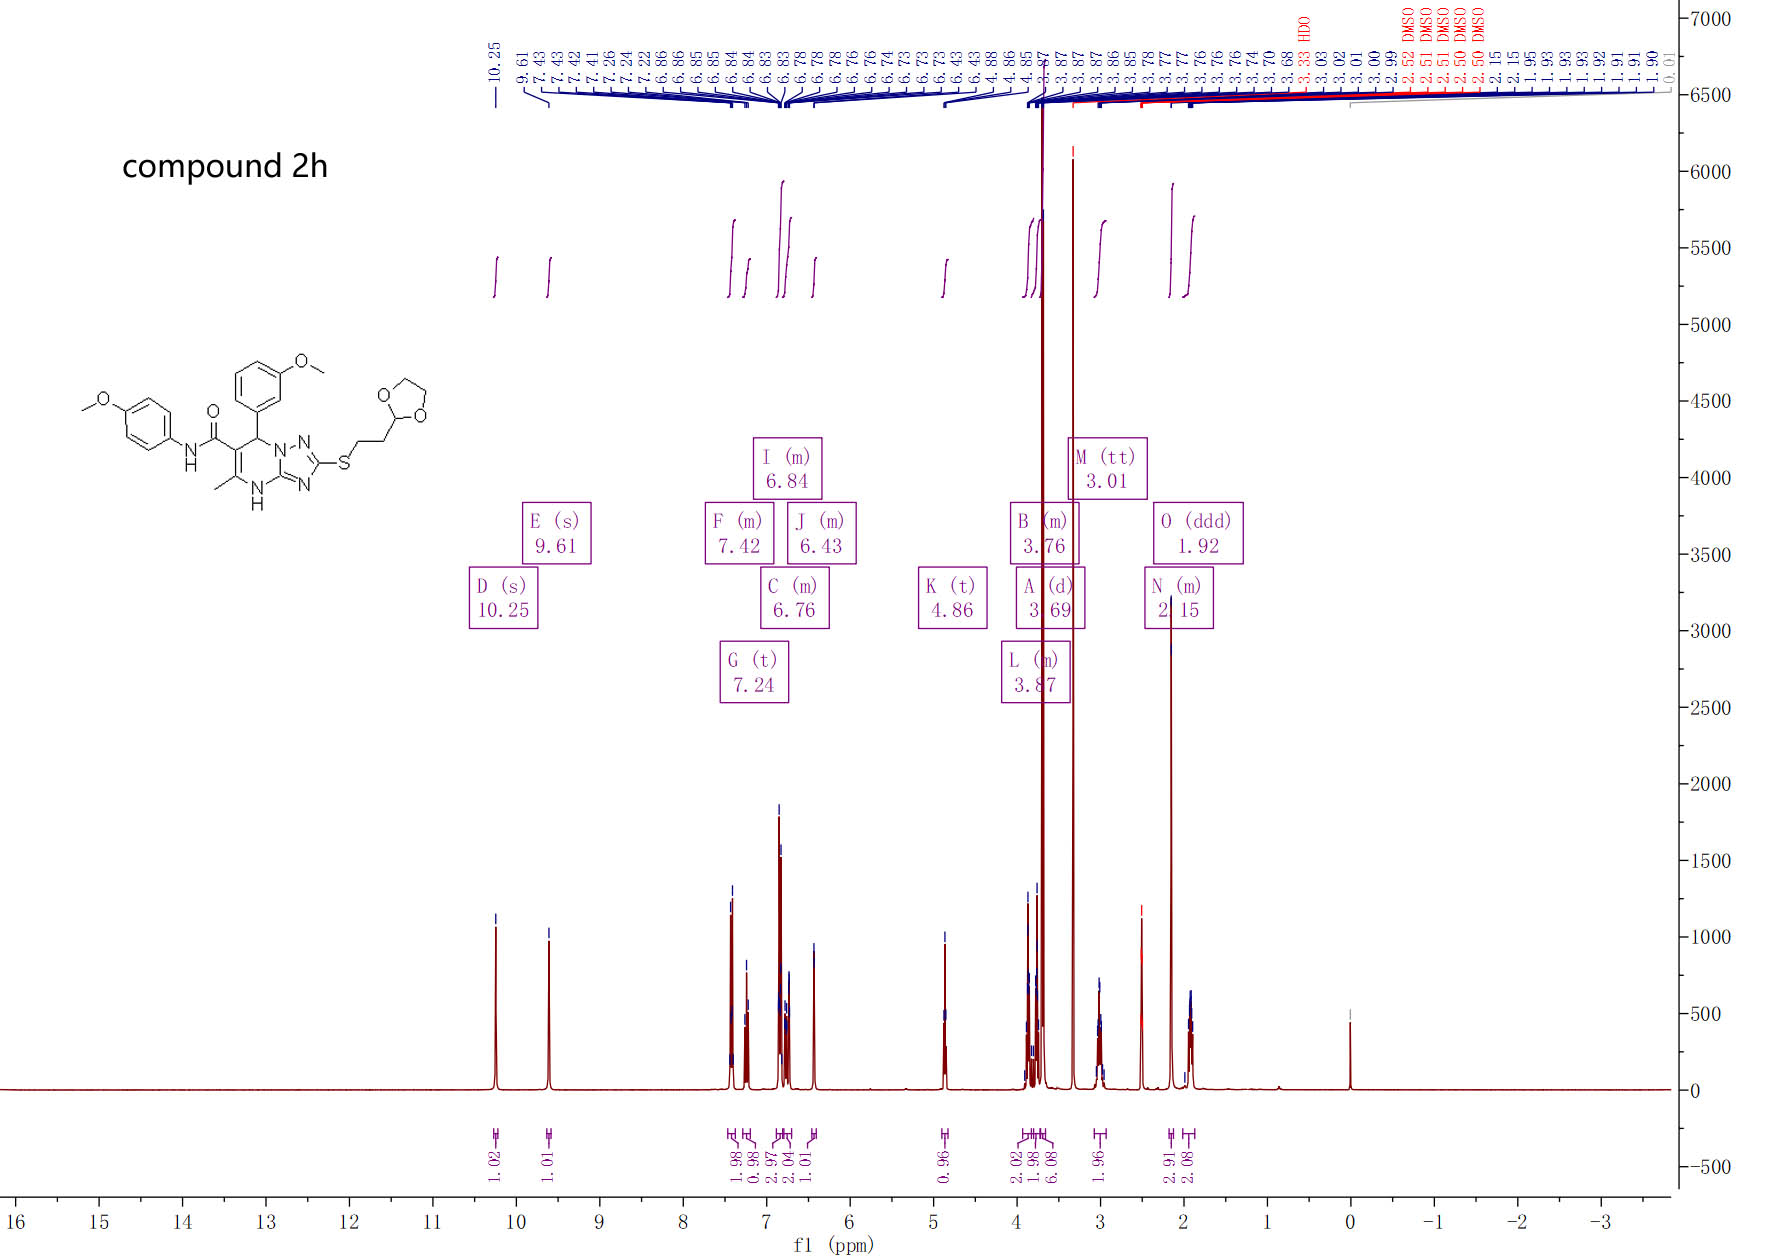


## 1H-NMR spectra of compound 2h


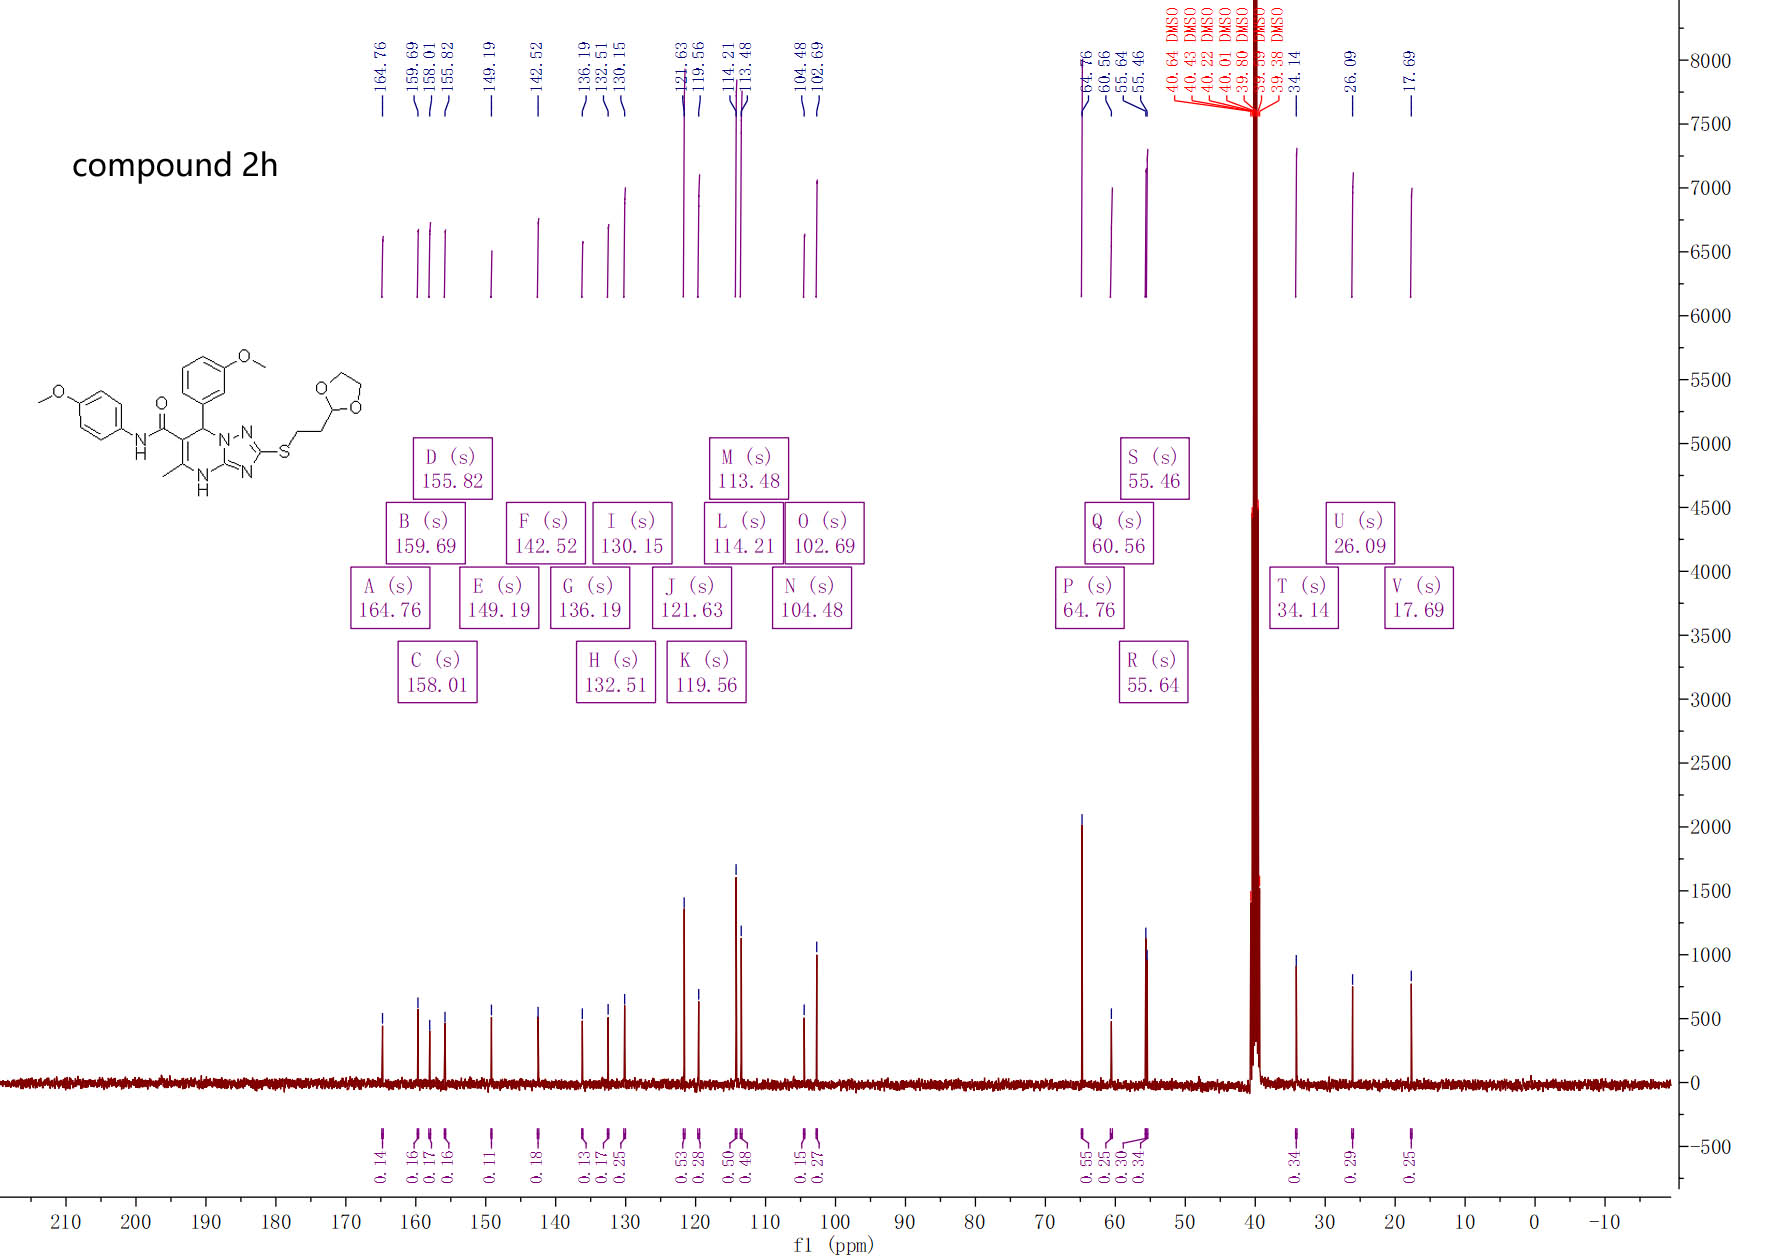


## 13C-NMR spectra of compound 2h


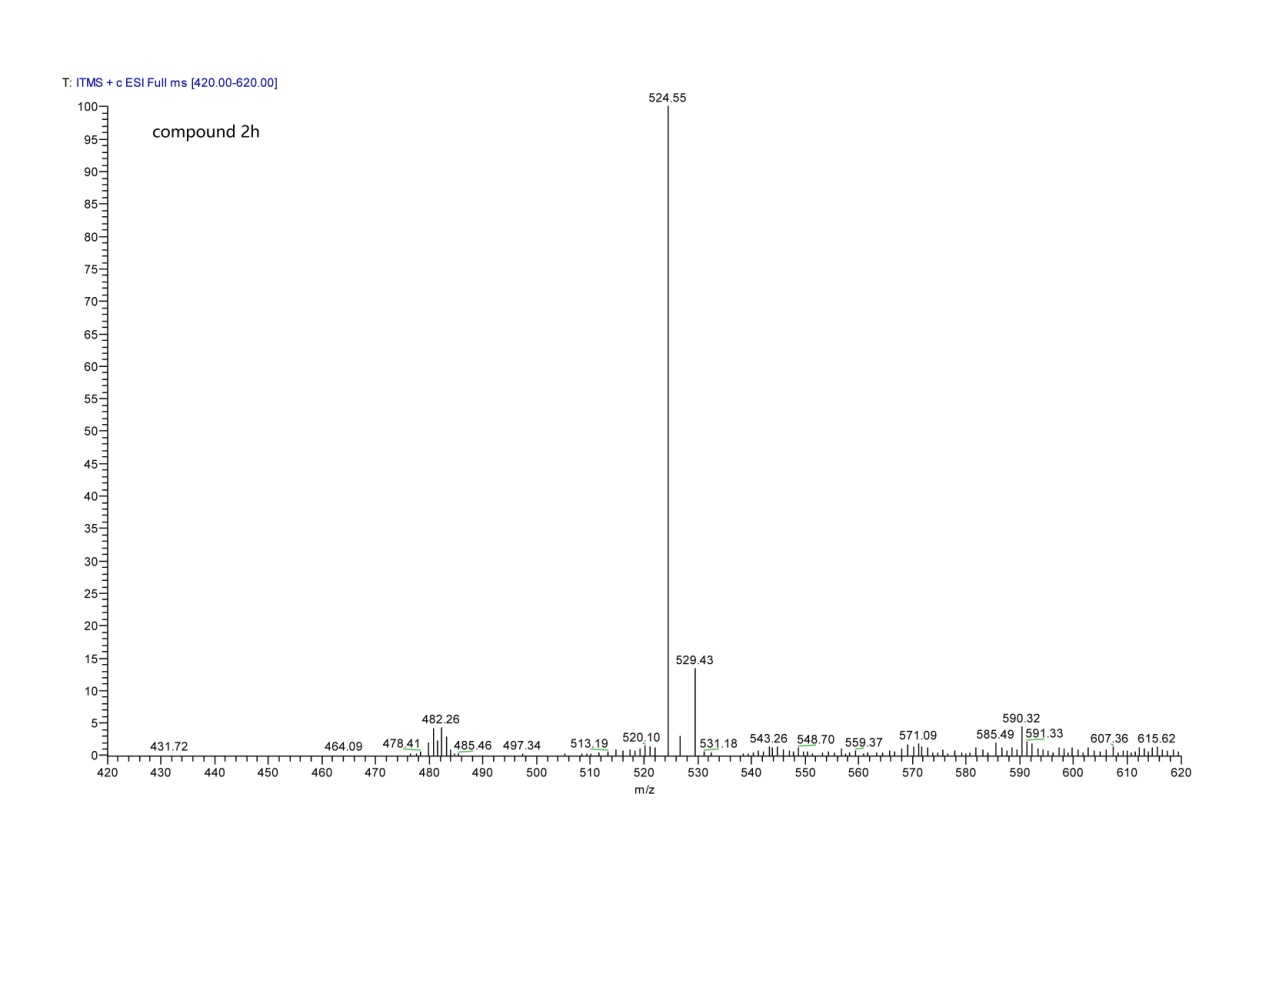


## MS spectra of compound 2h


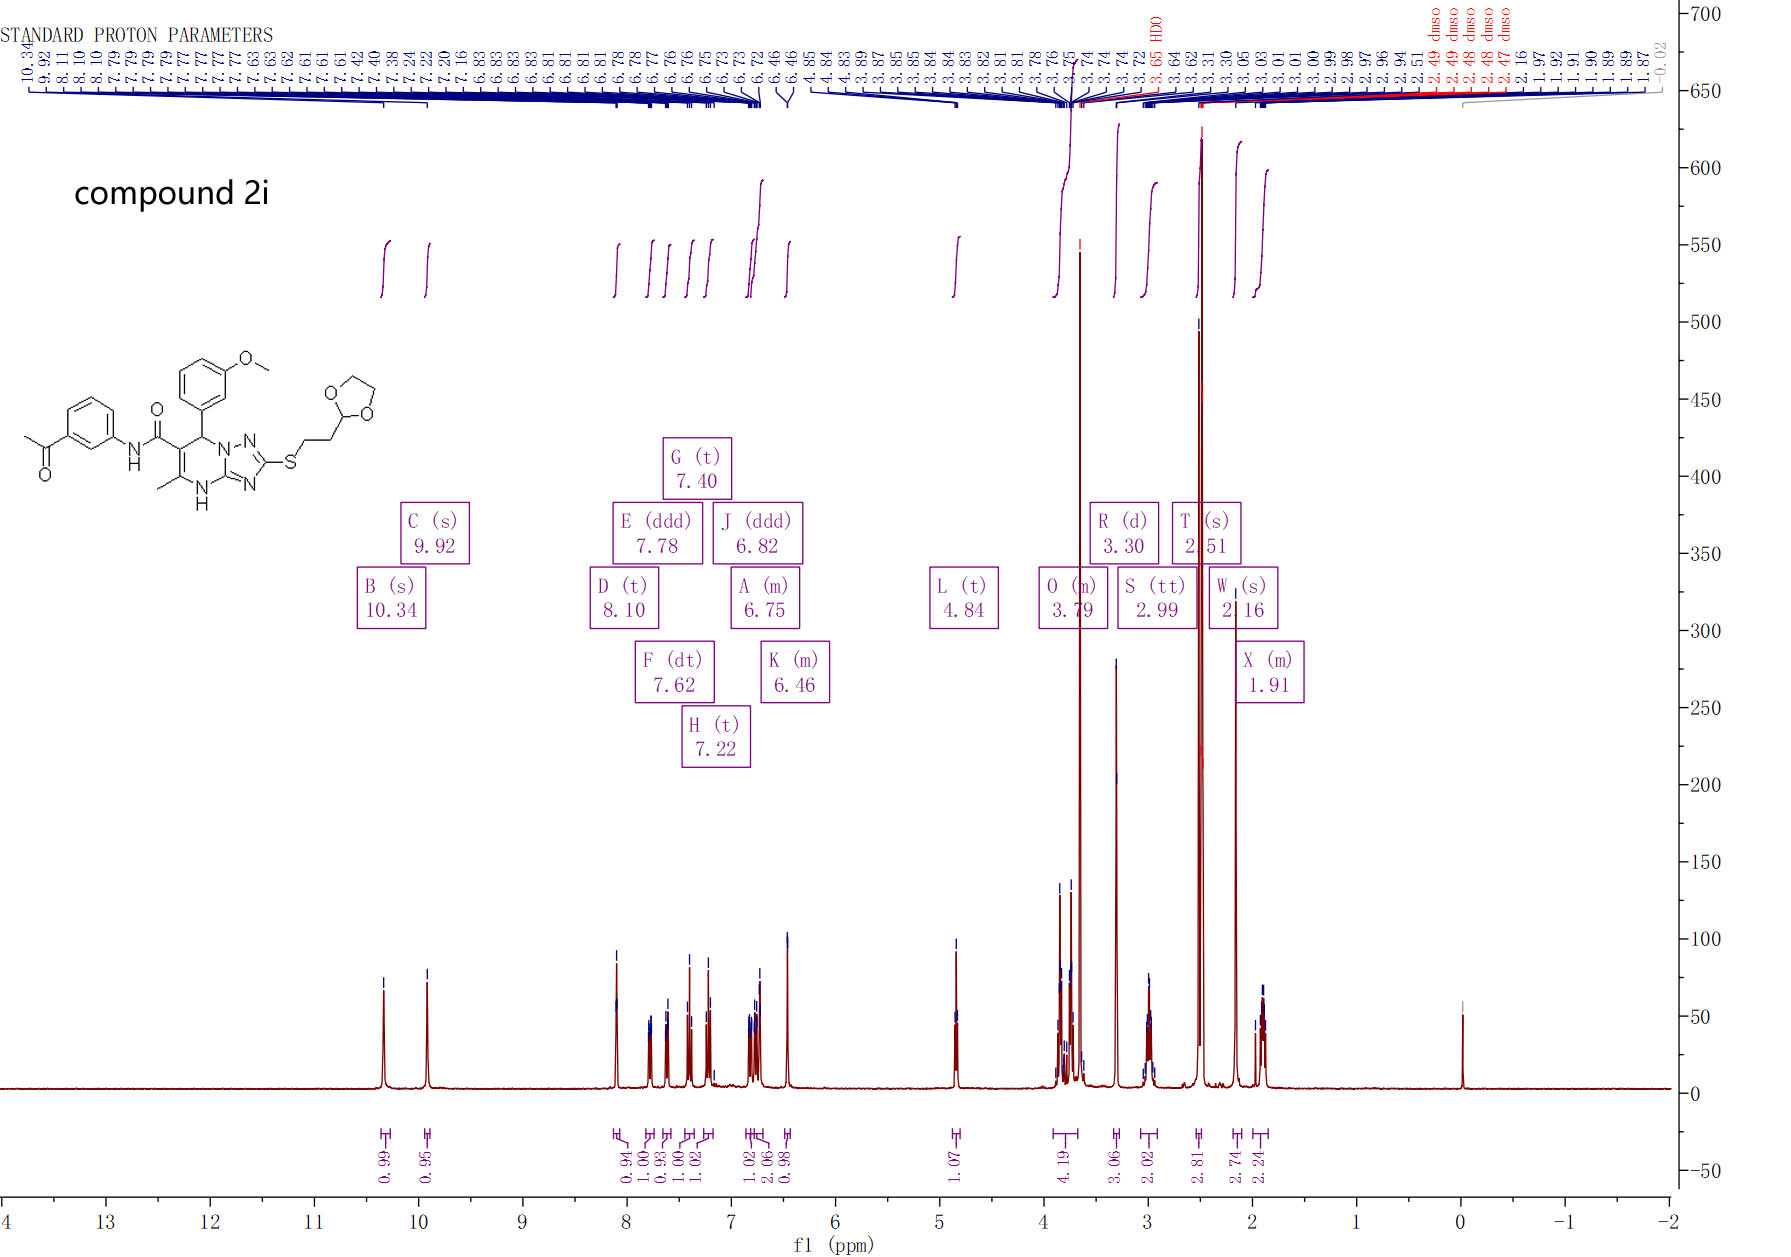


## 1H-NMR spectra of compound 2i


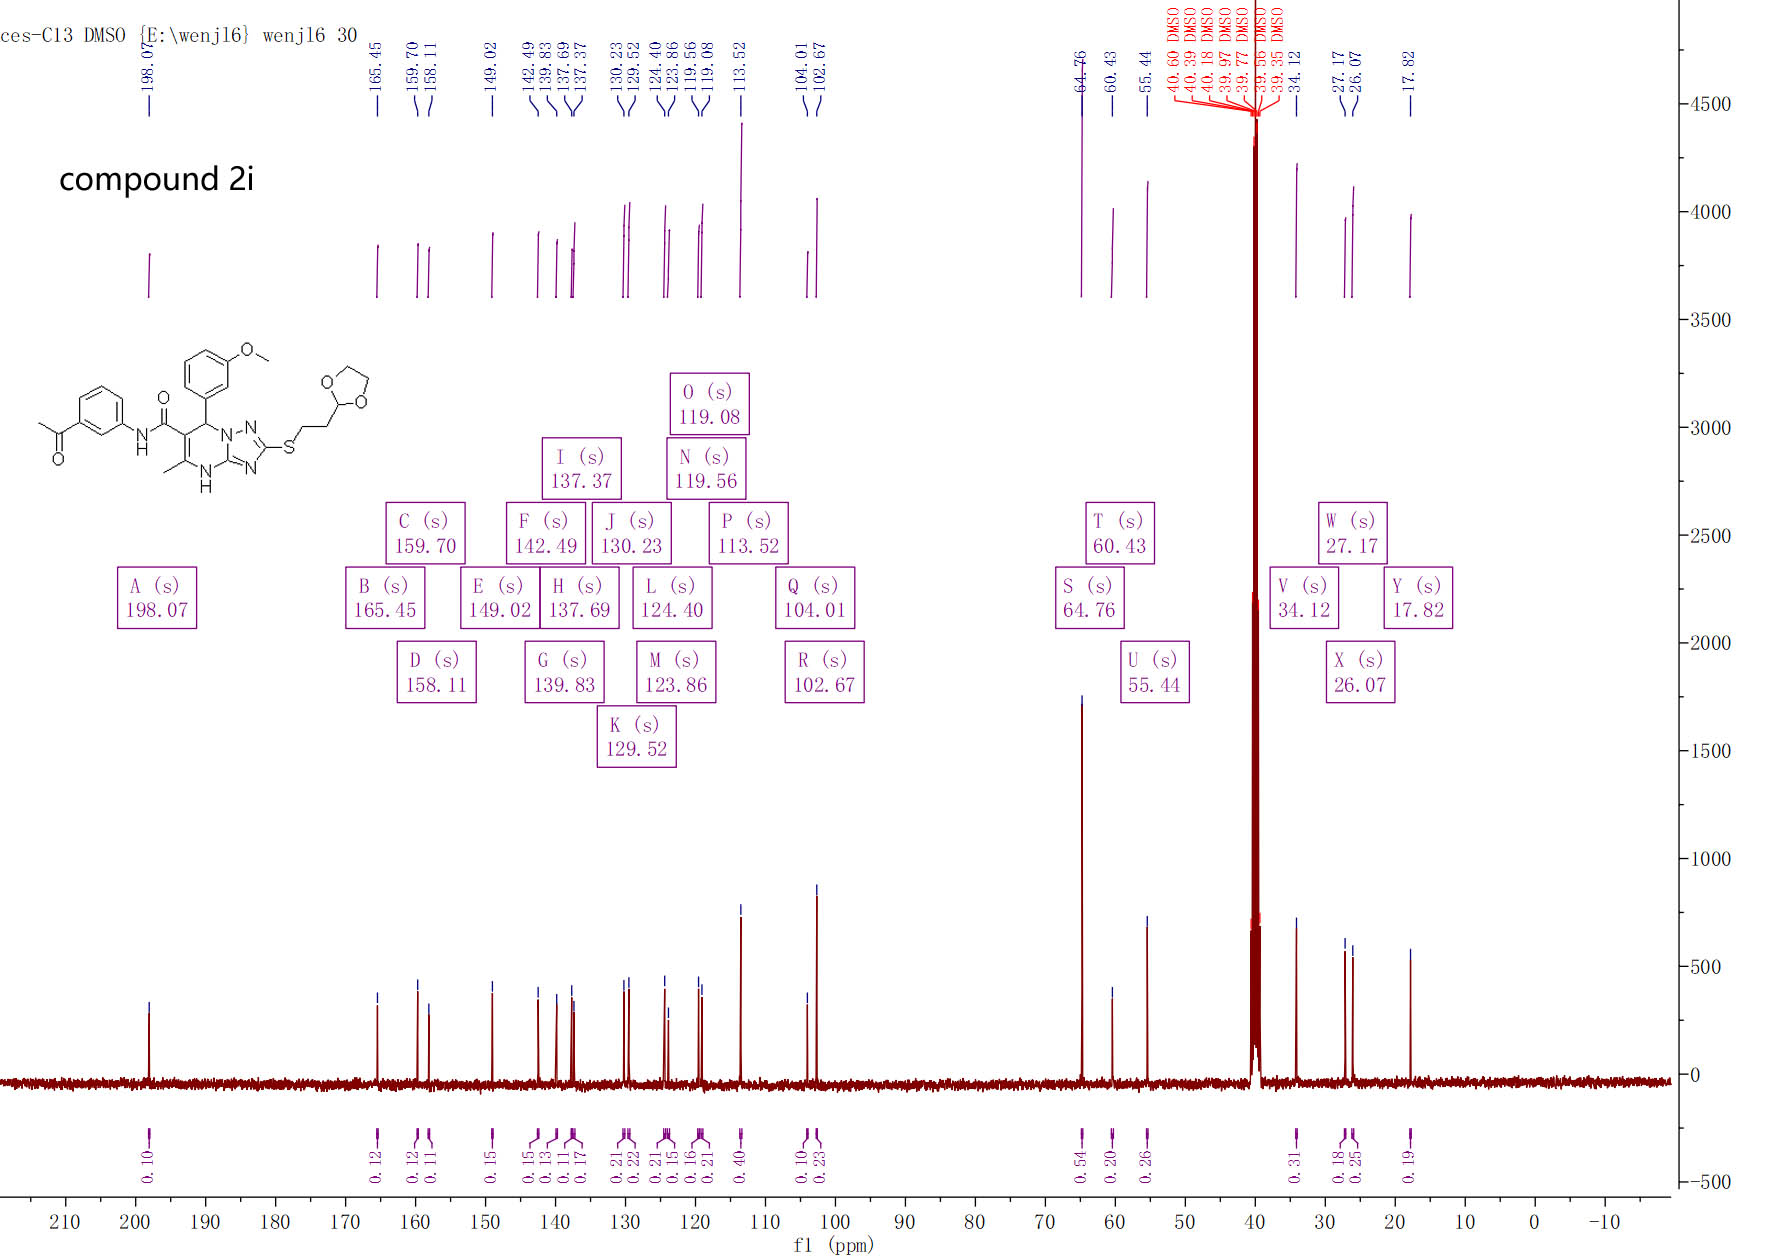


## 13C-NMR spectra of compound 2i


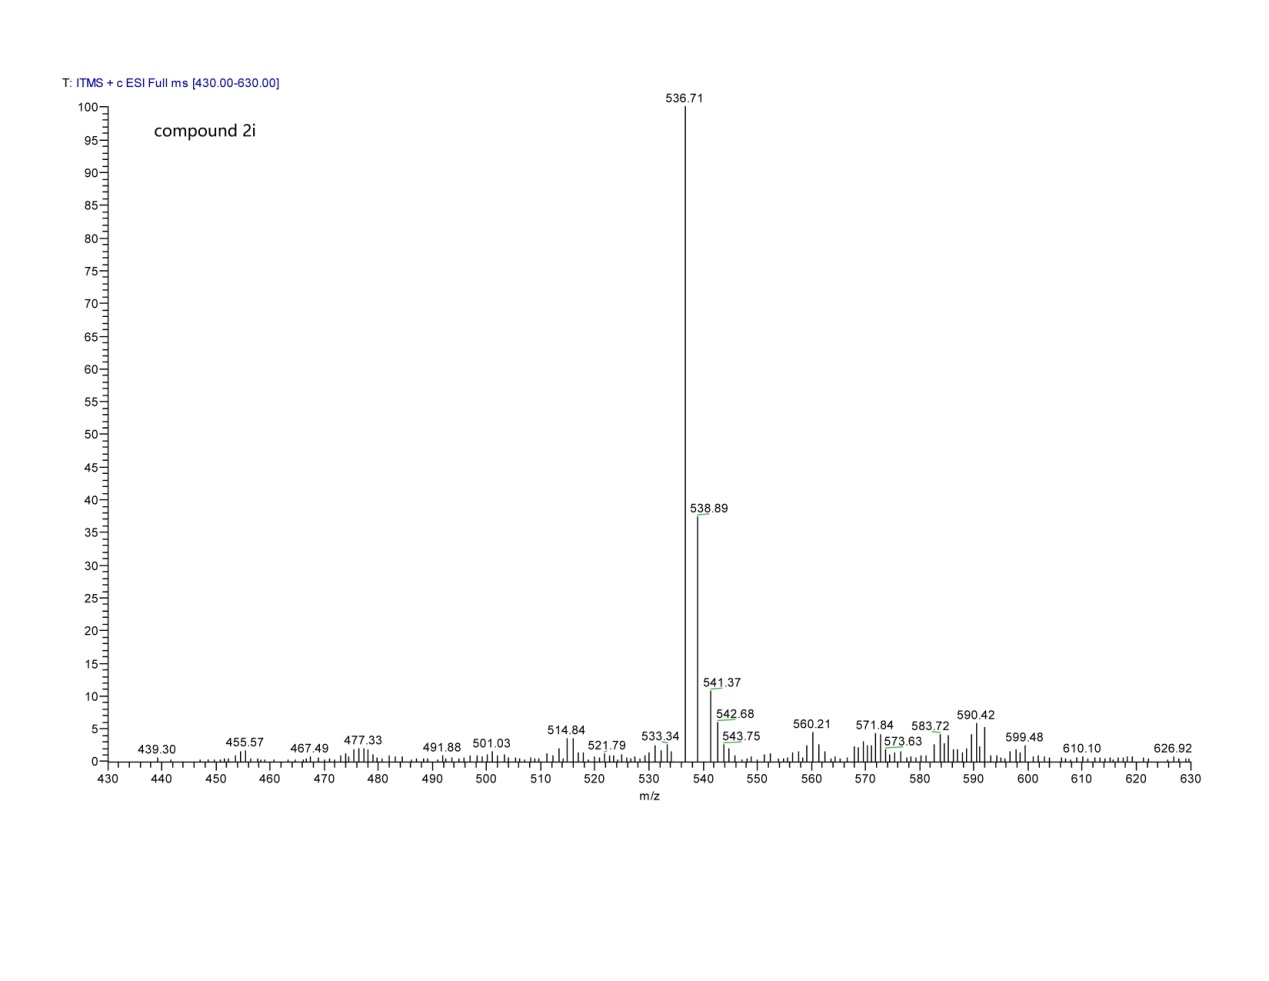


## MS spectra of compound 2i


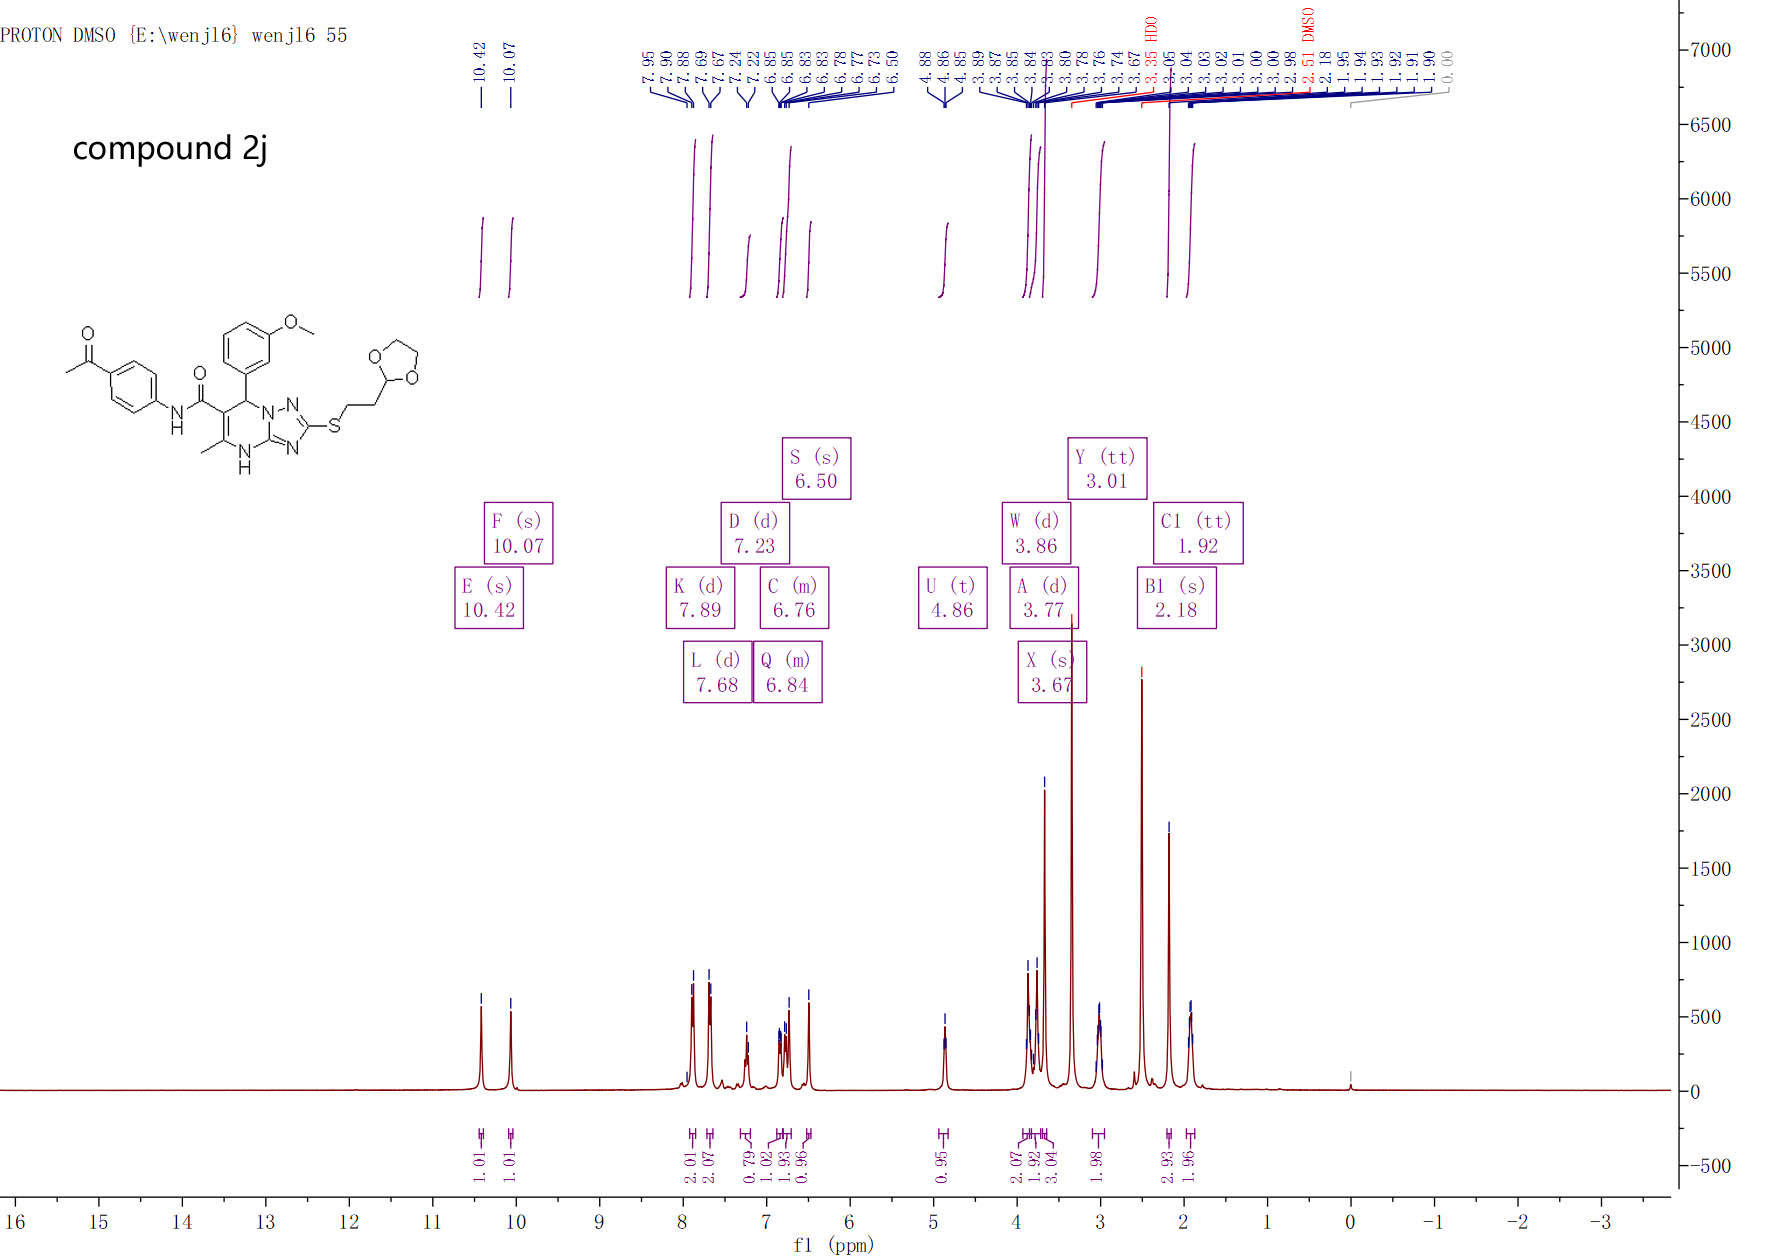


## 1H-NMR spectra of compound 2j


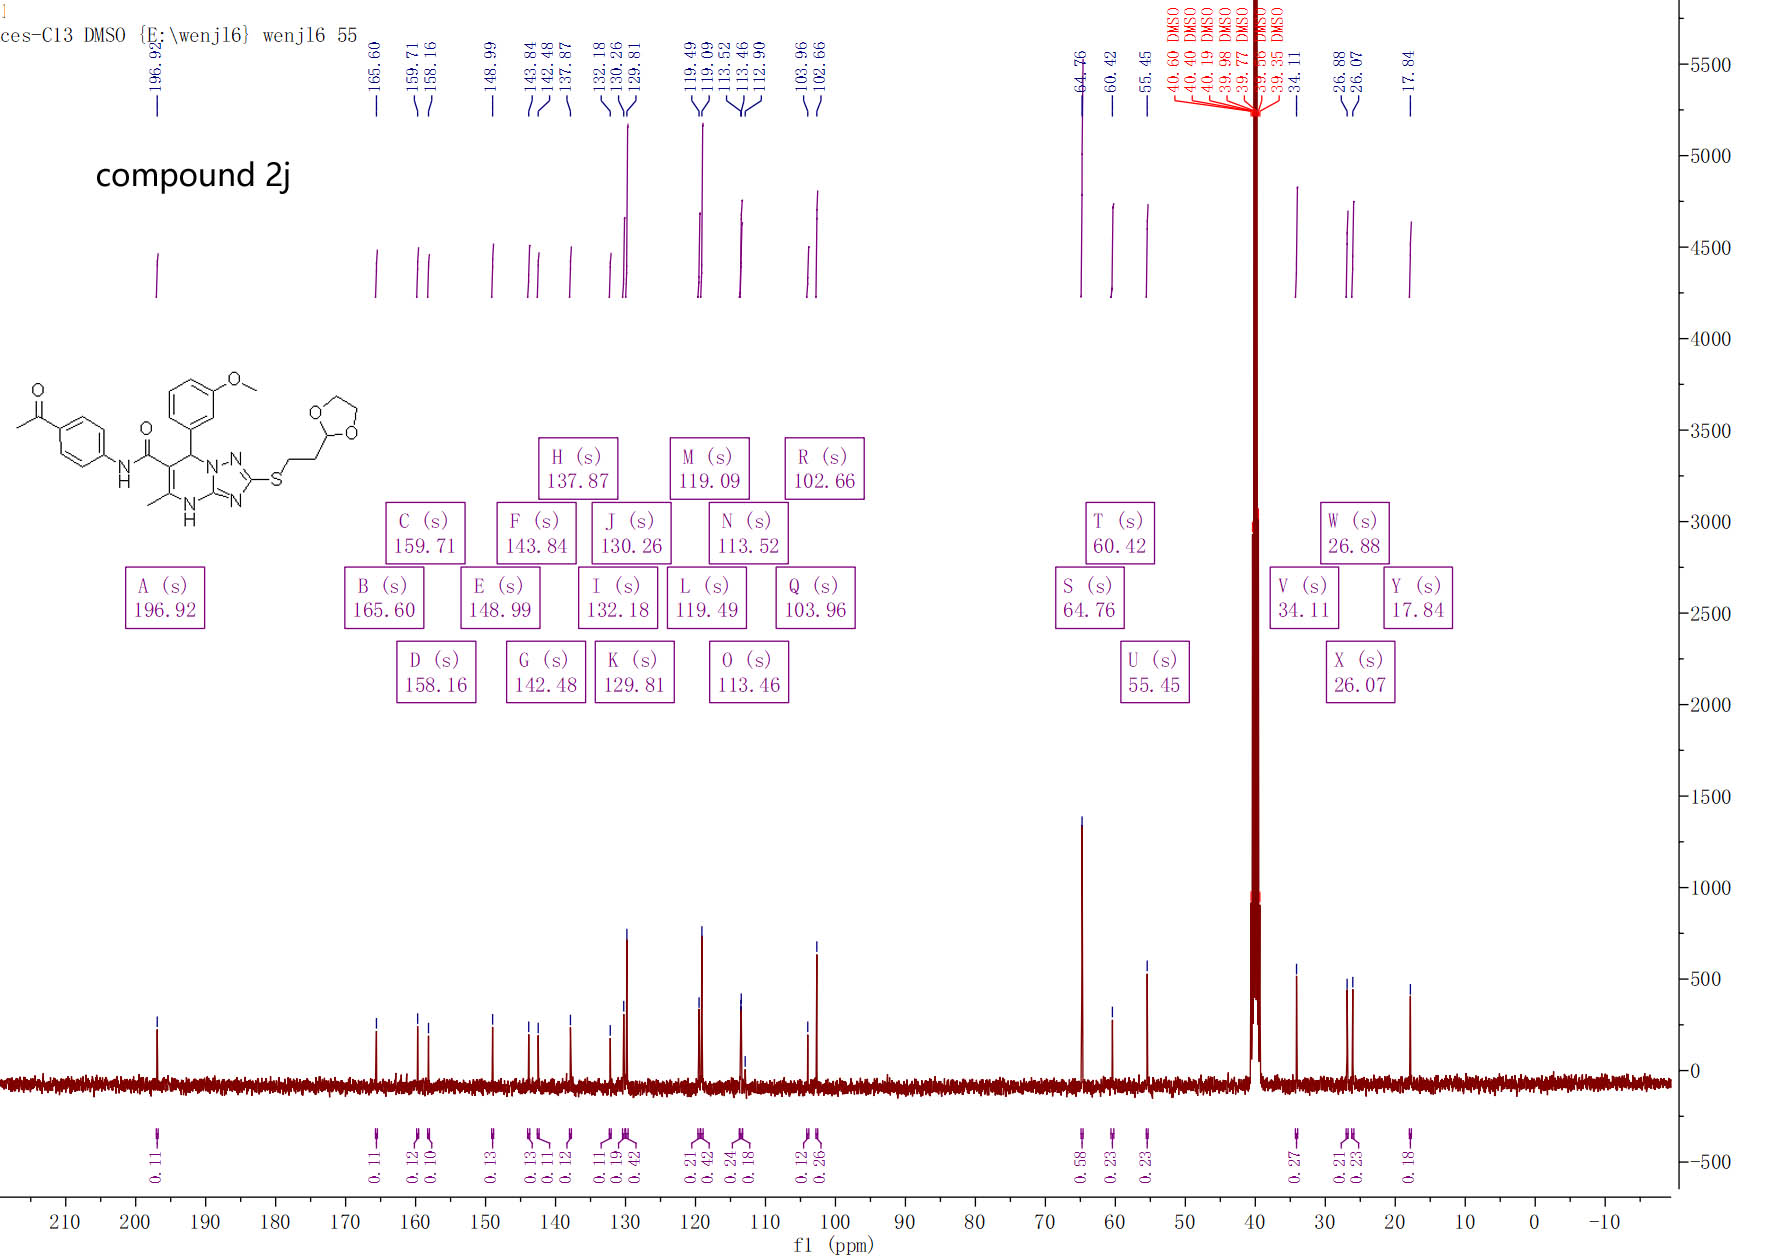


## 13C-NMR spectra of compound 2j


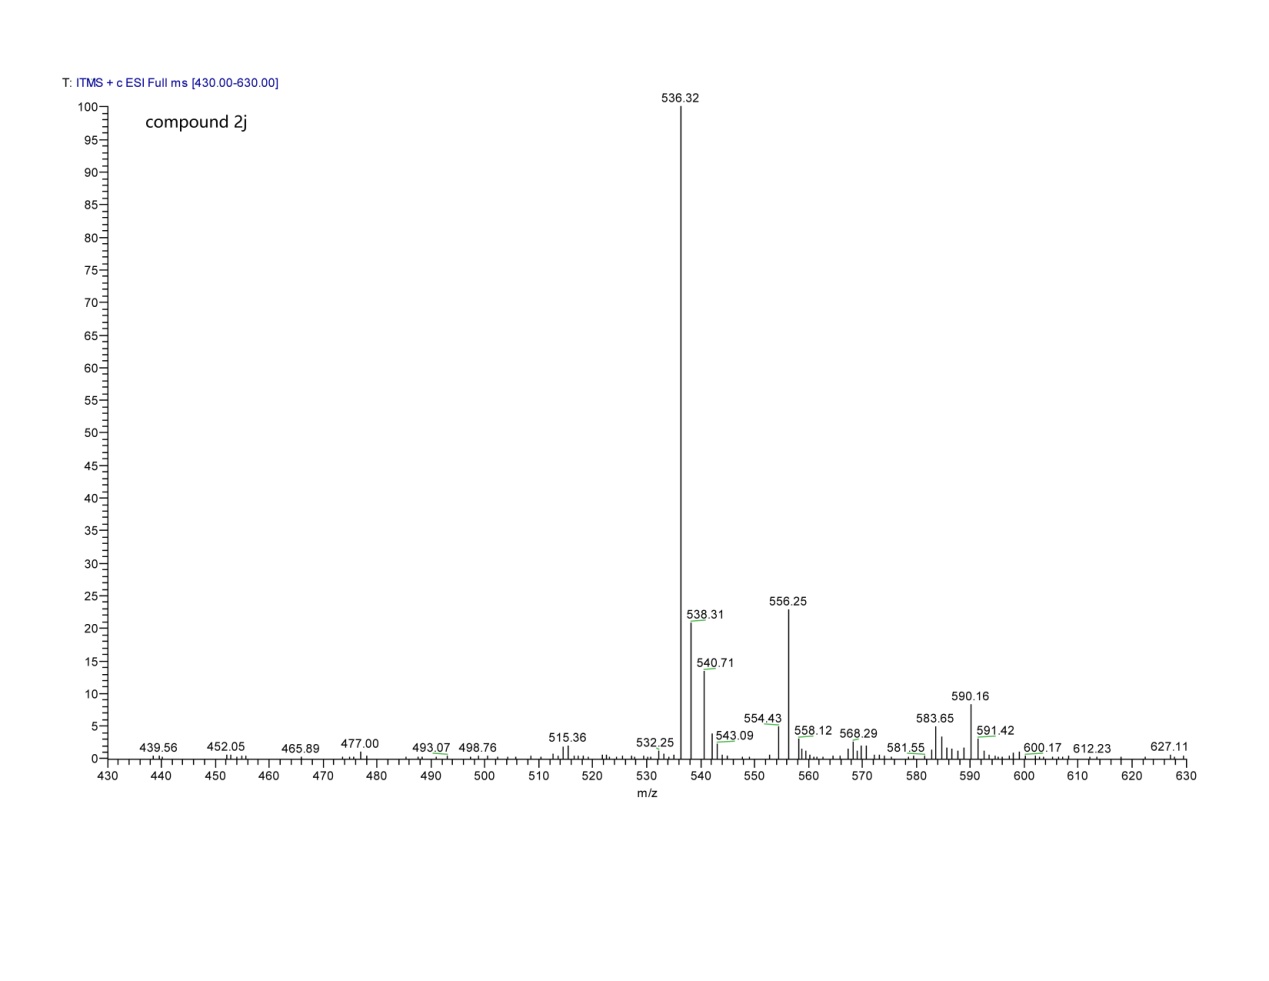


## MS spectra of compound 2j


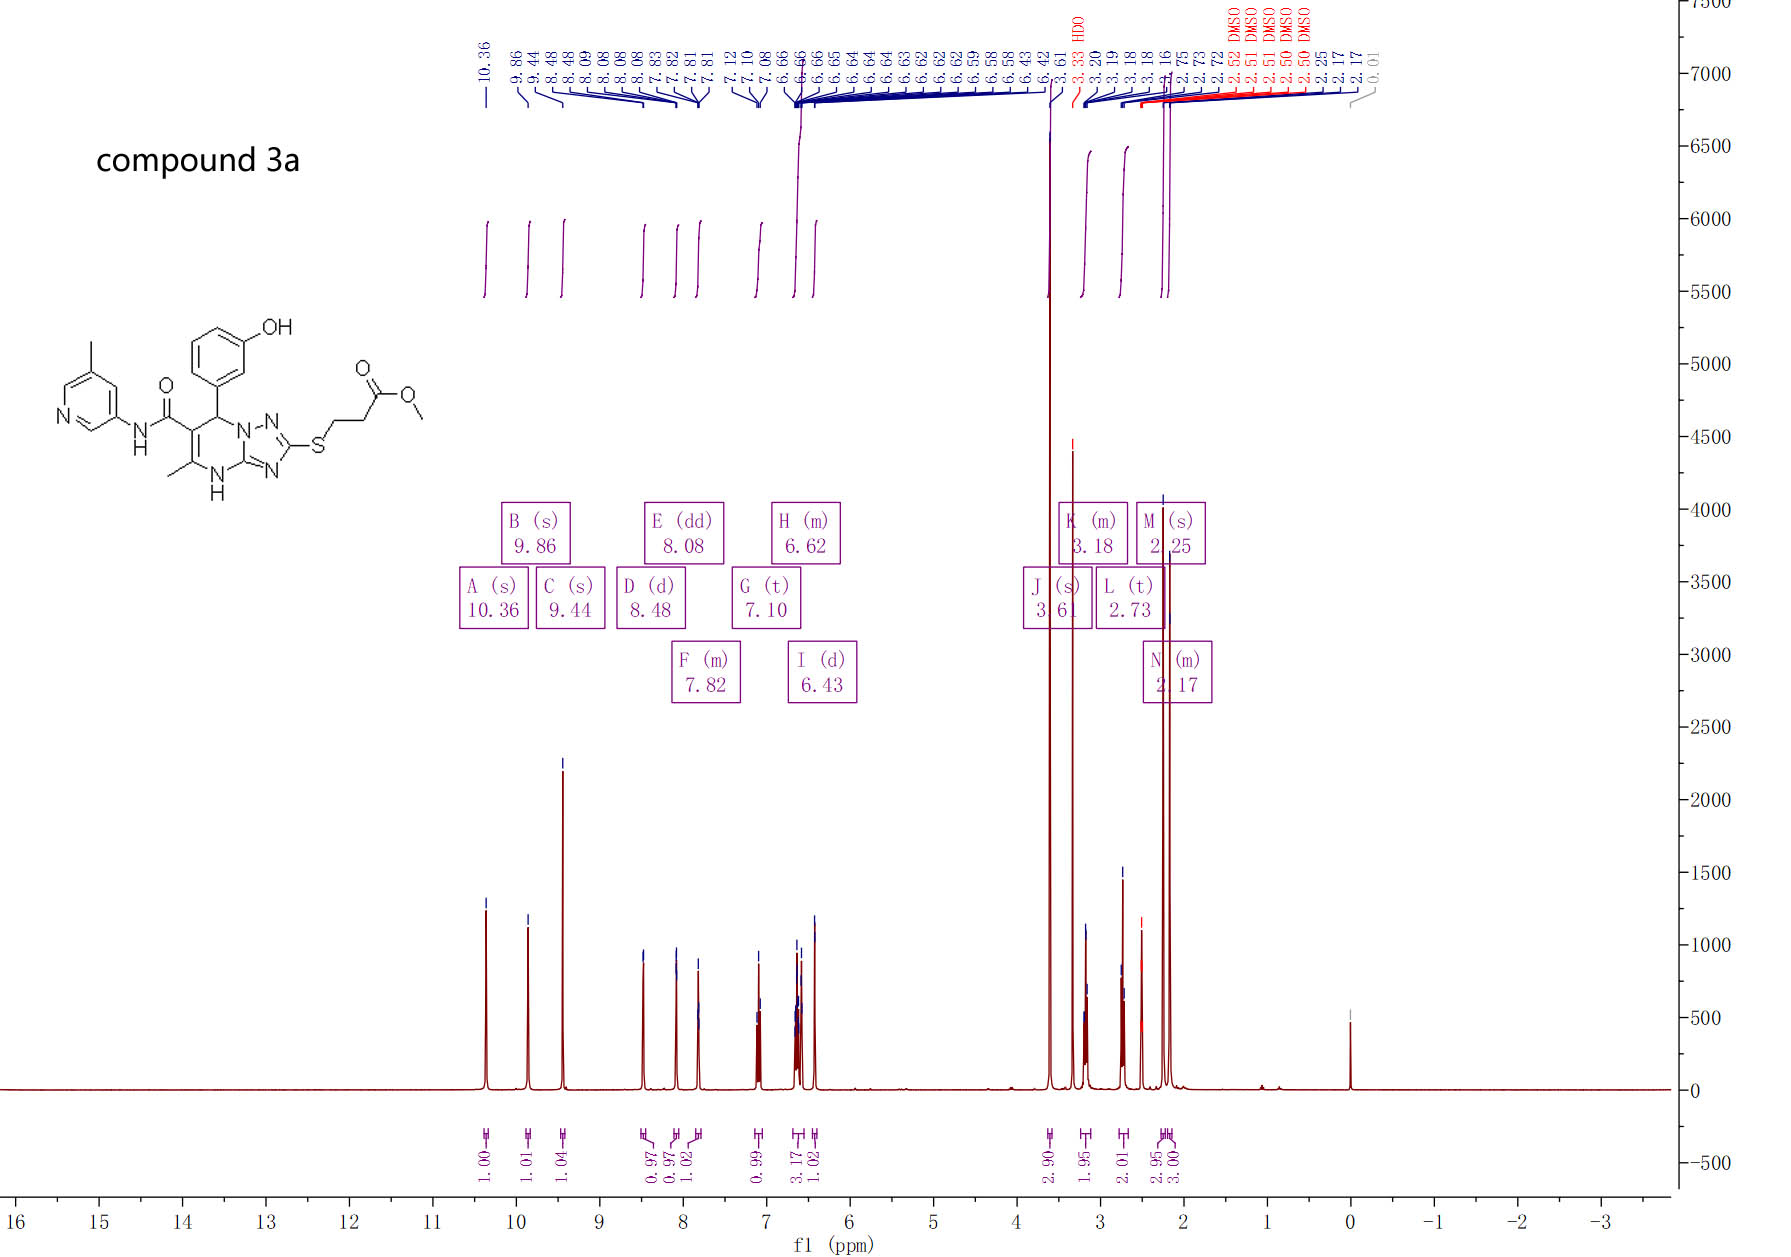


## 1H-NMR spectra of compound 3a


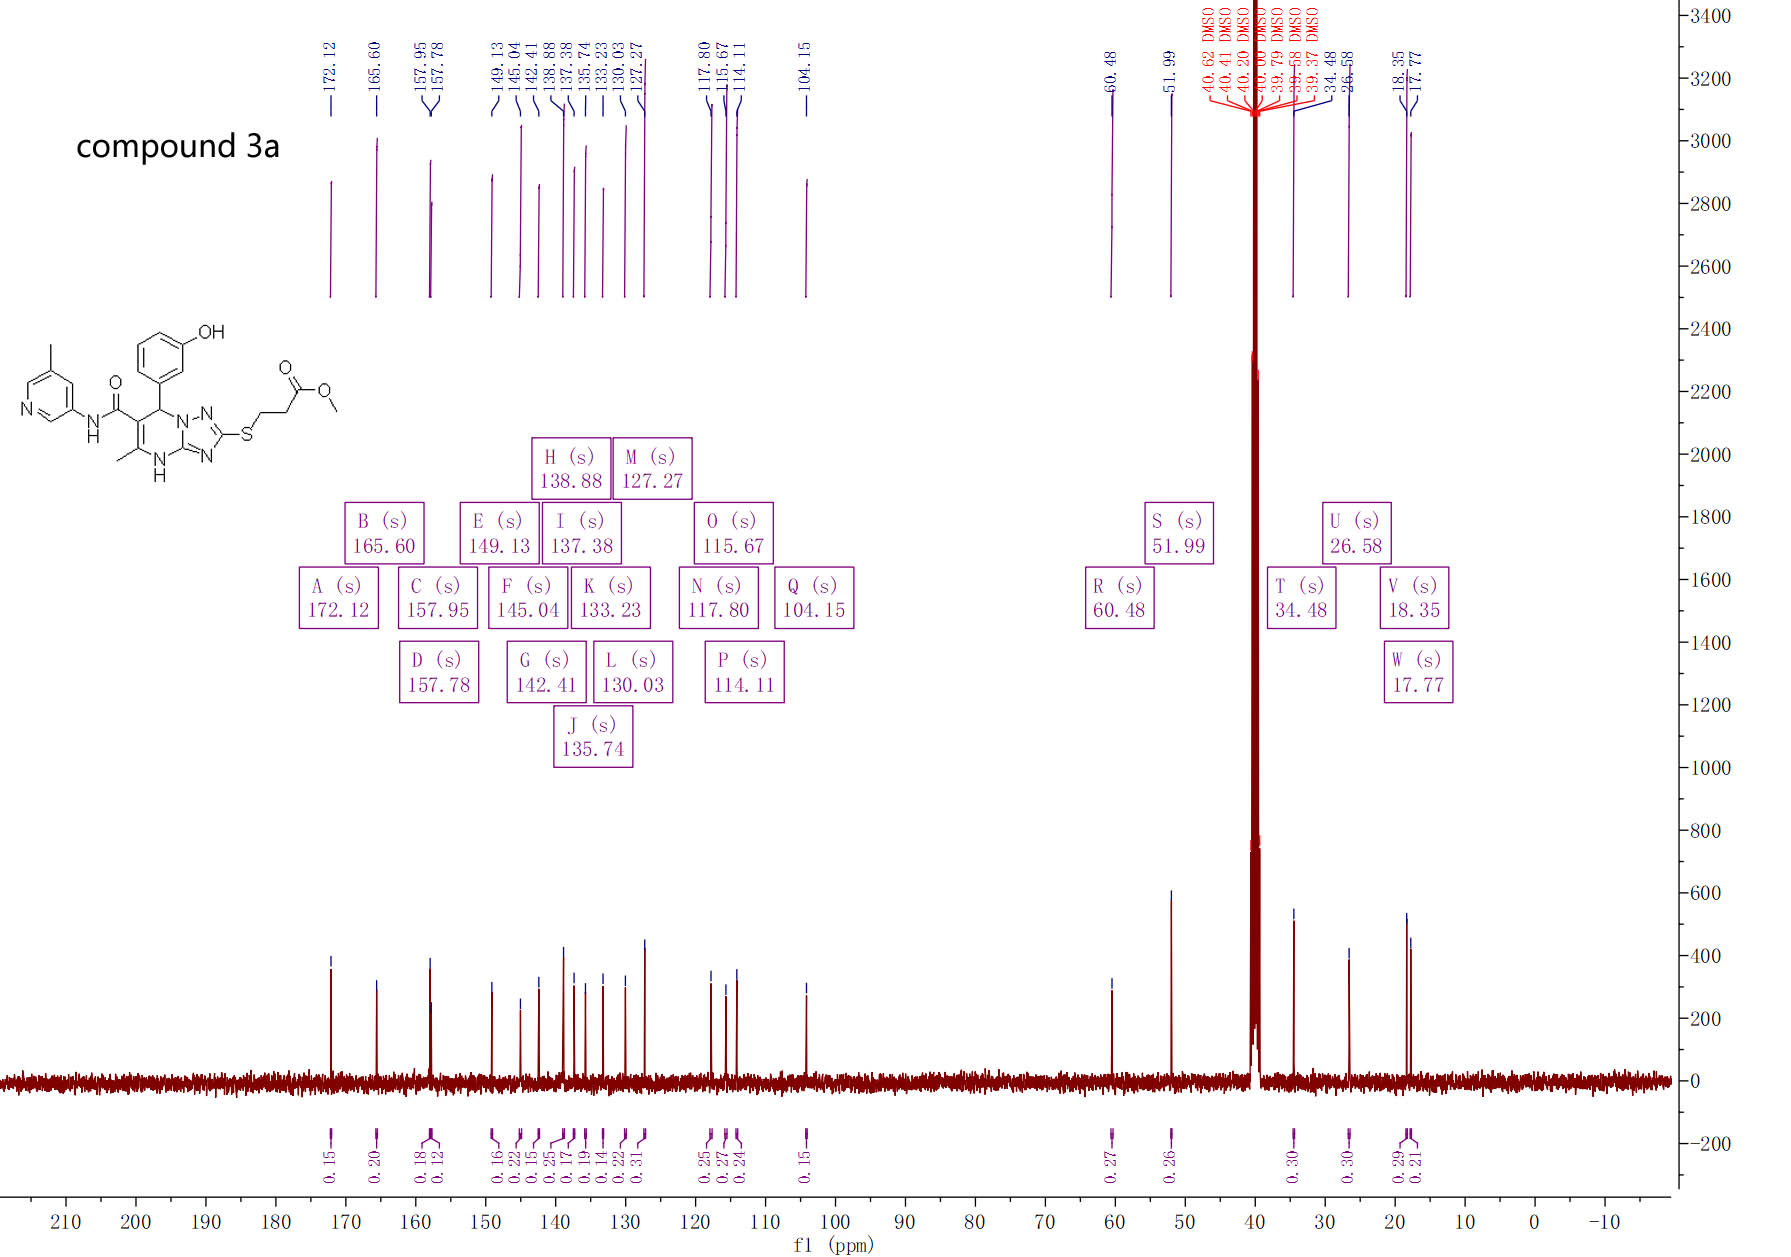


## 13C-NMR spectra of compound 3a


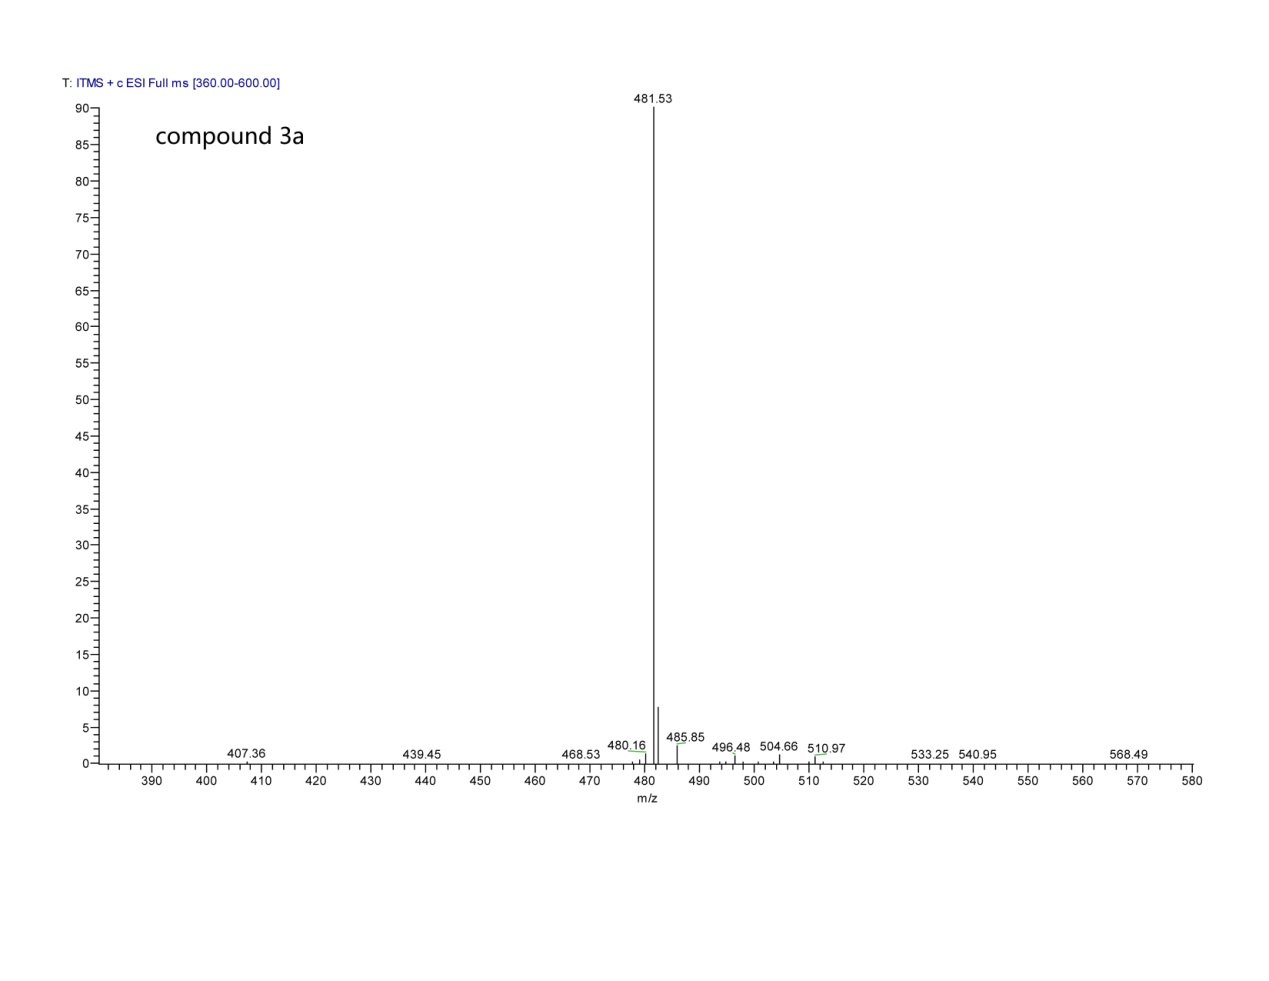


## MS spectra of compound 3a


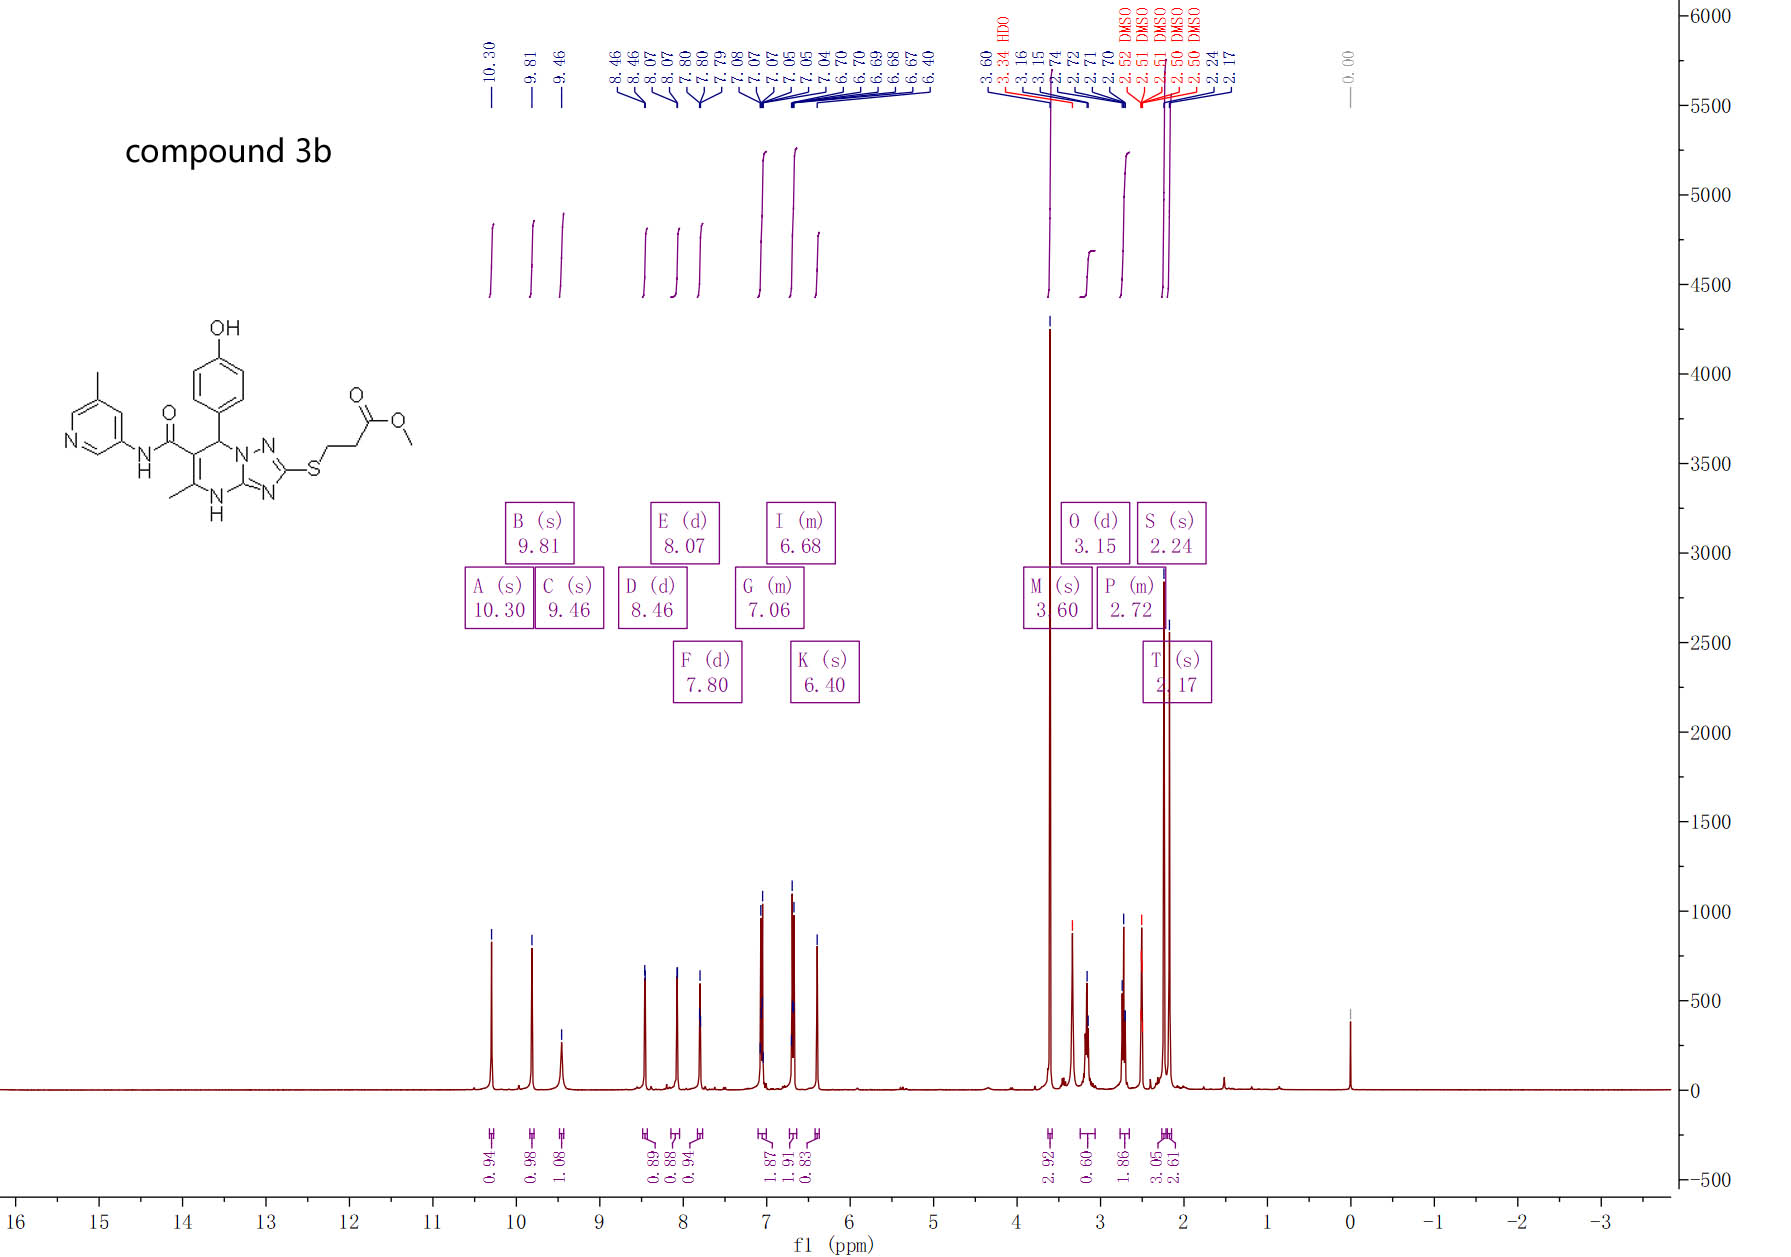


## 1H-NMR spectra of compound 3b


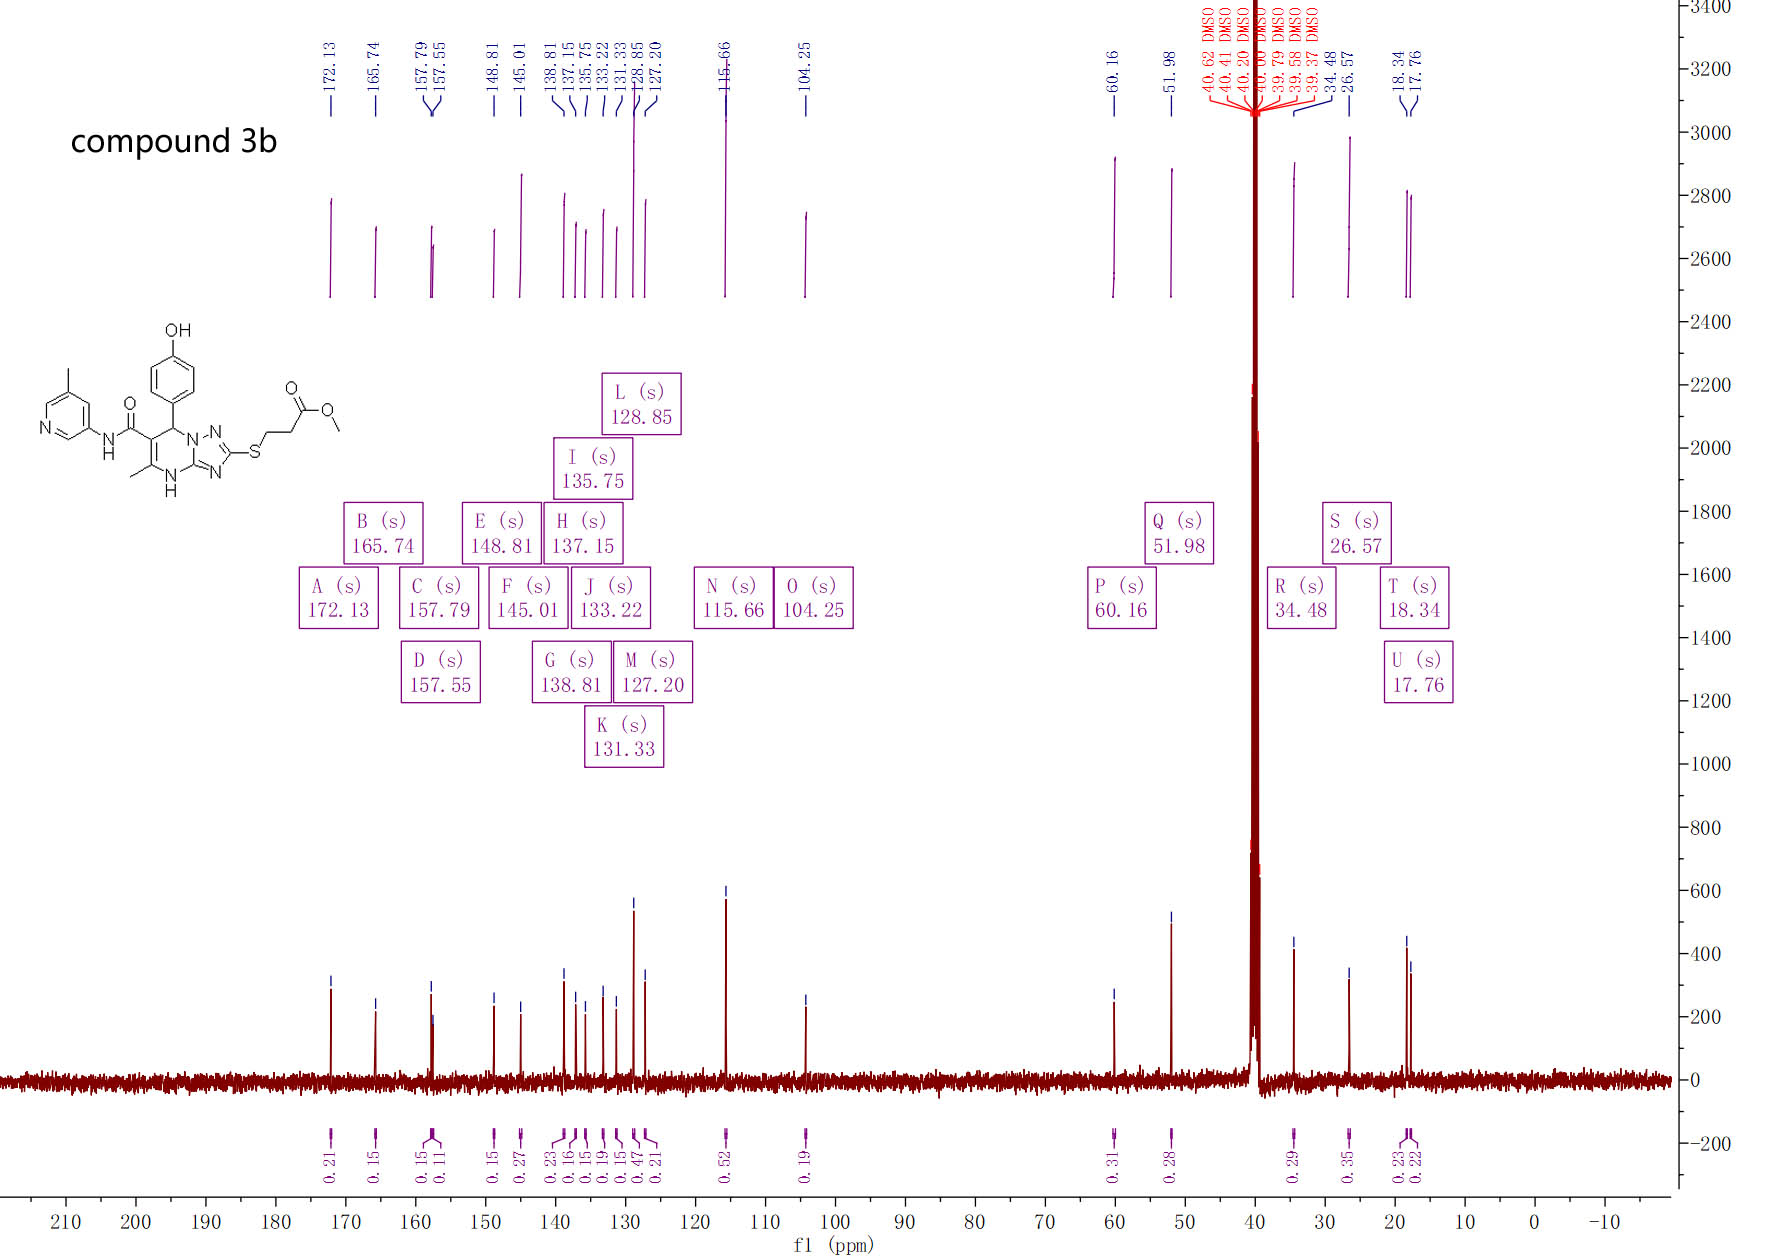


## 13C-NMR spectra of compound 3b


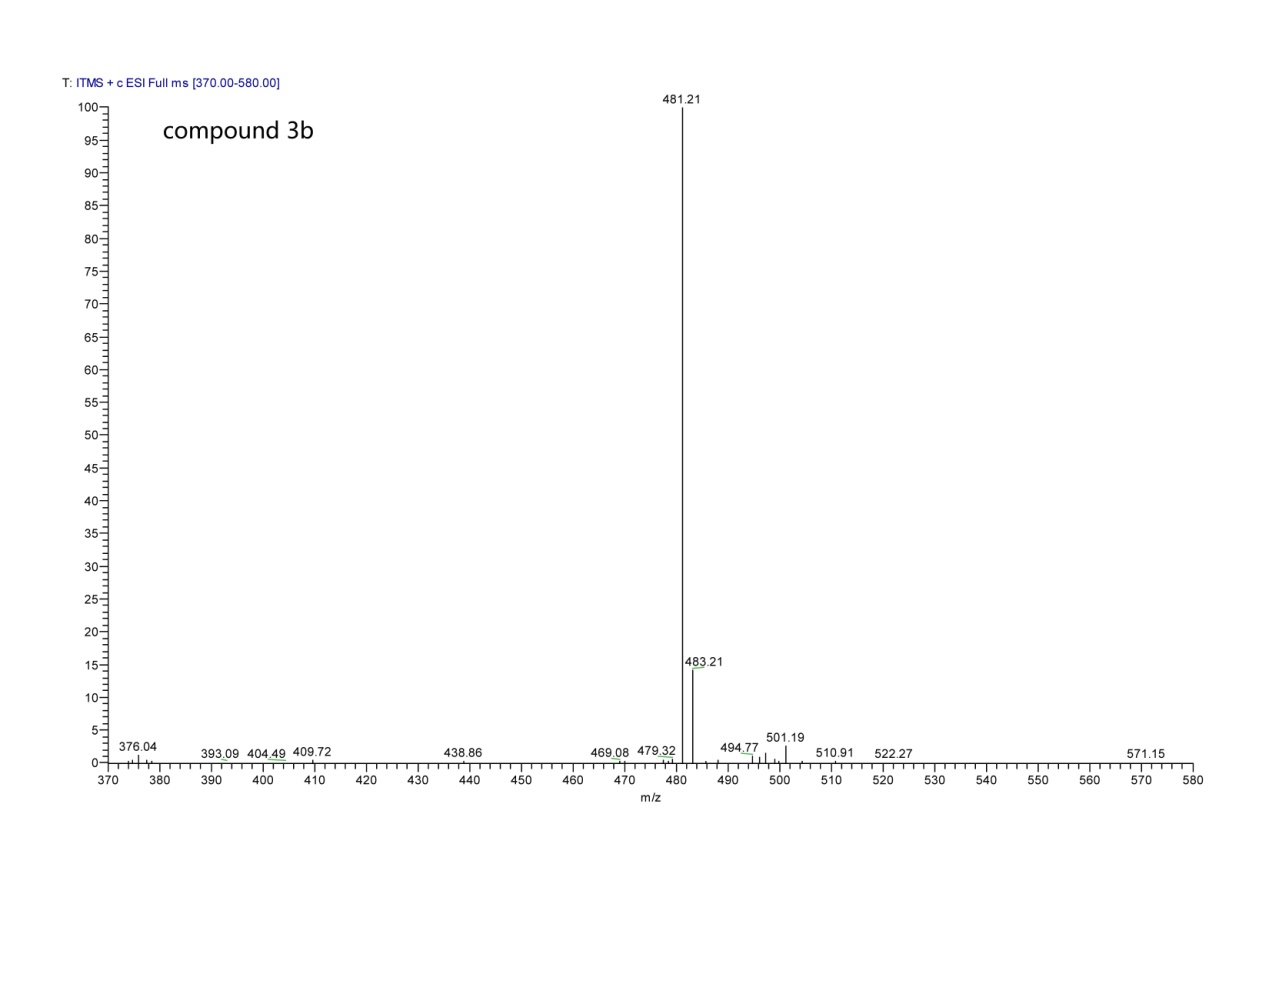


## MS spectra of compound 3b


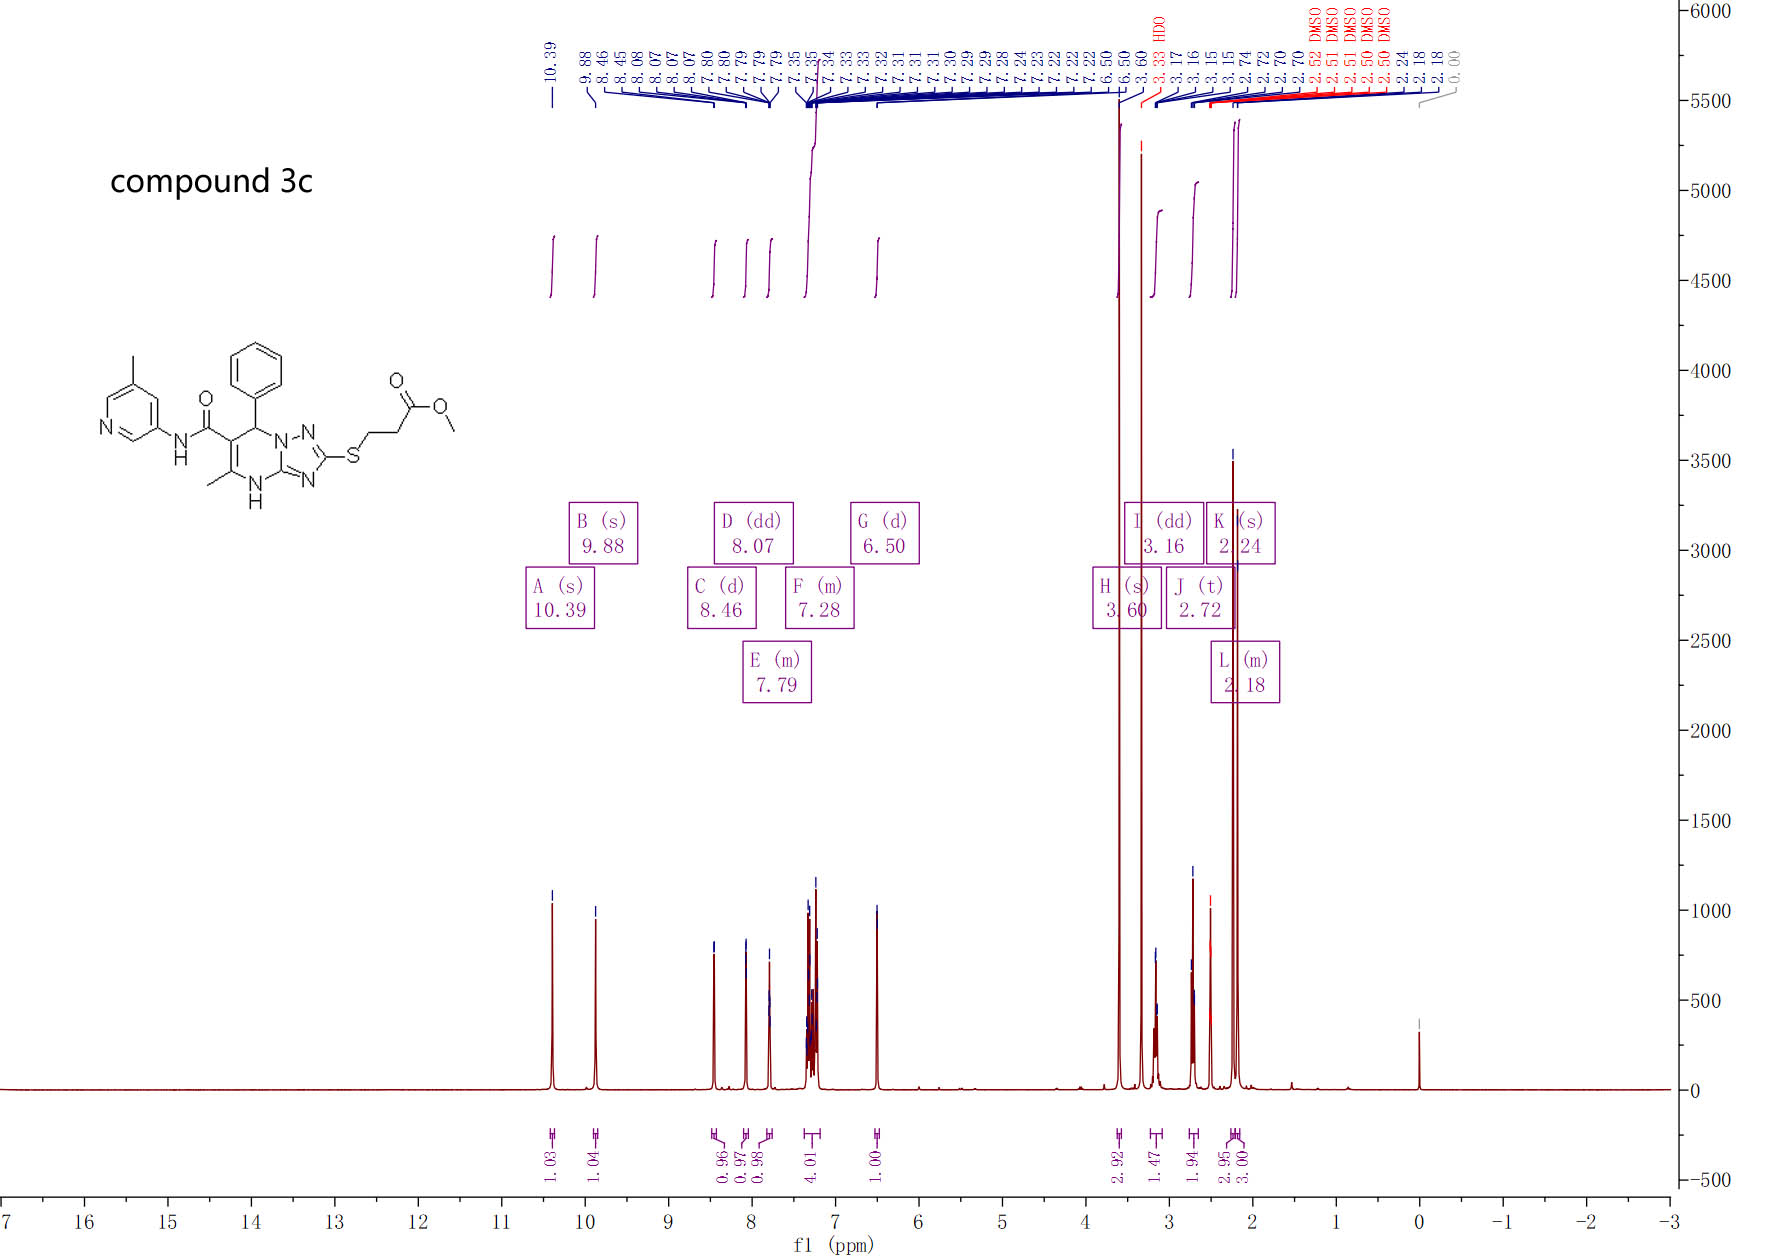


## 1H-NMR spectra of compound 3c


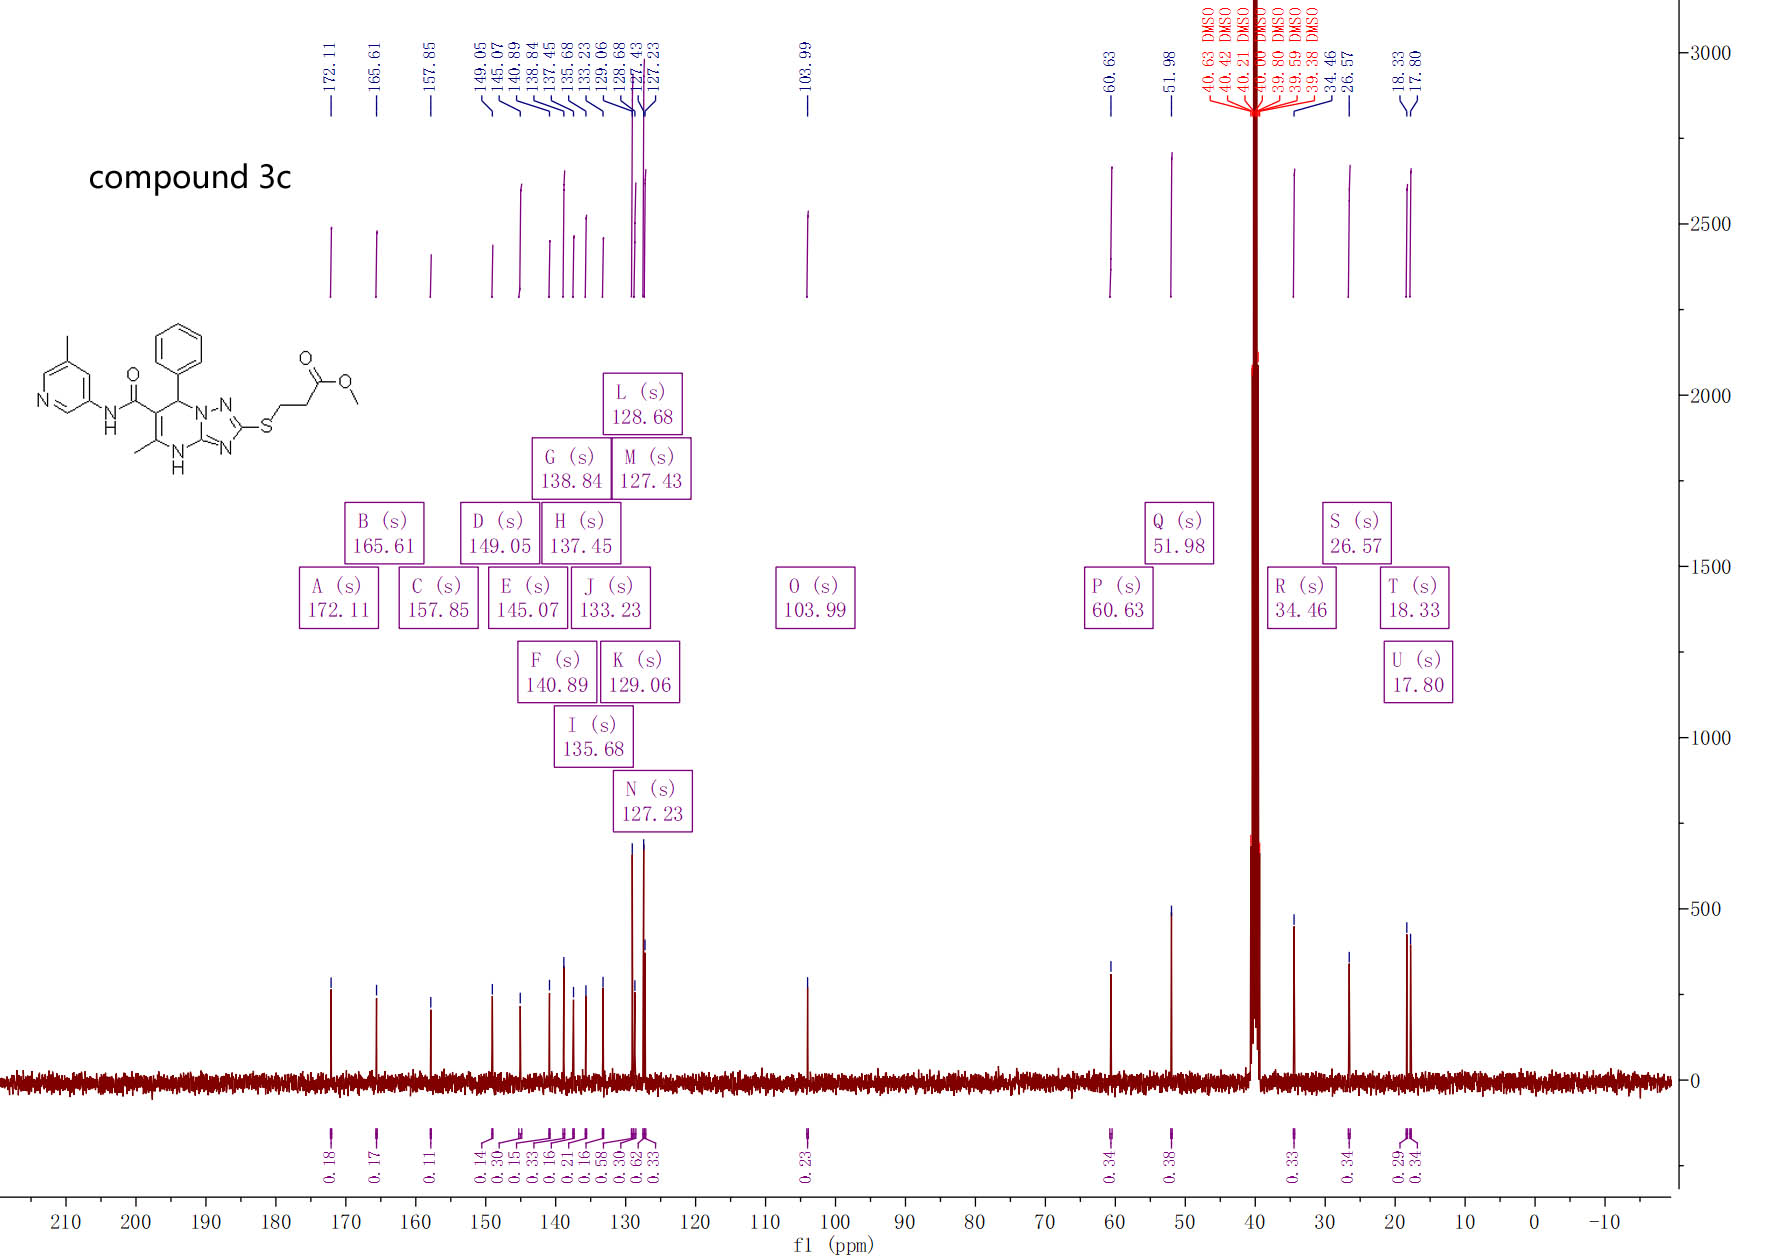


## 13C-NMR spectra of compound 3c


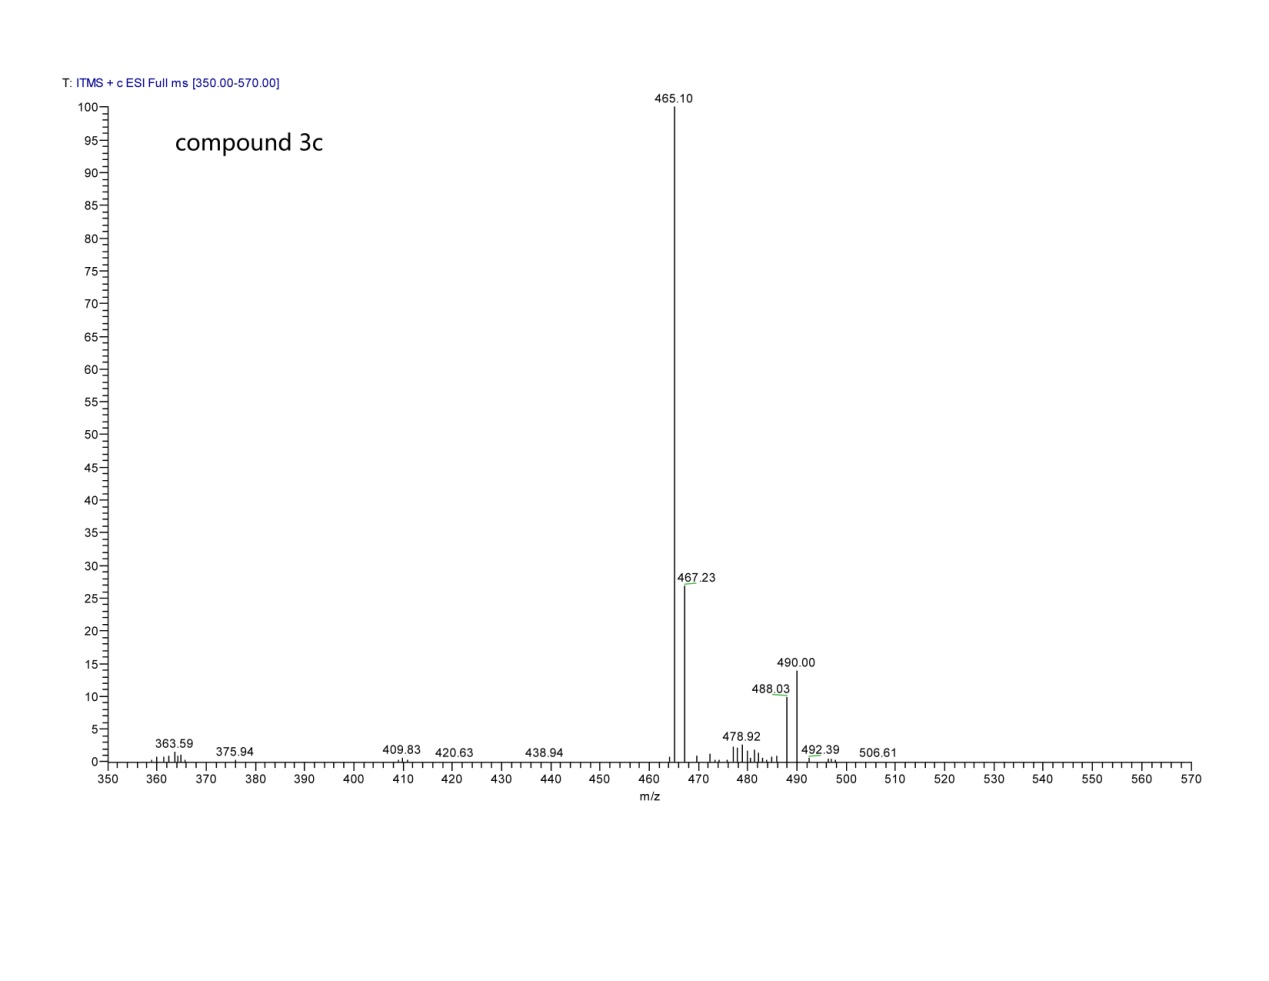


## MS spectra of compound 3c


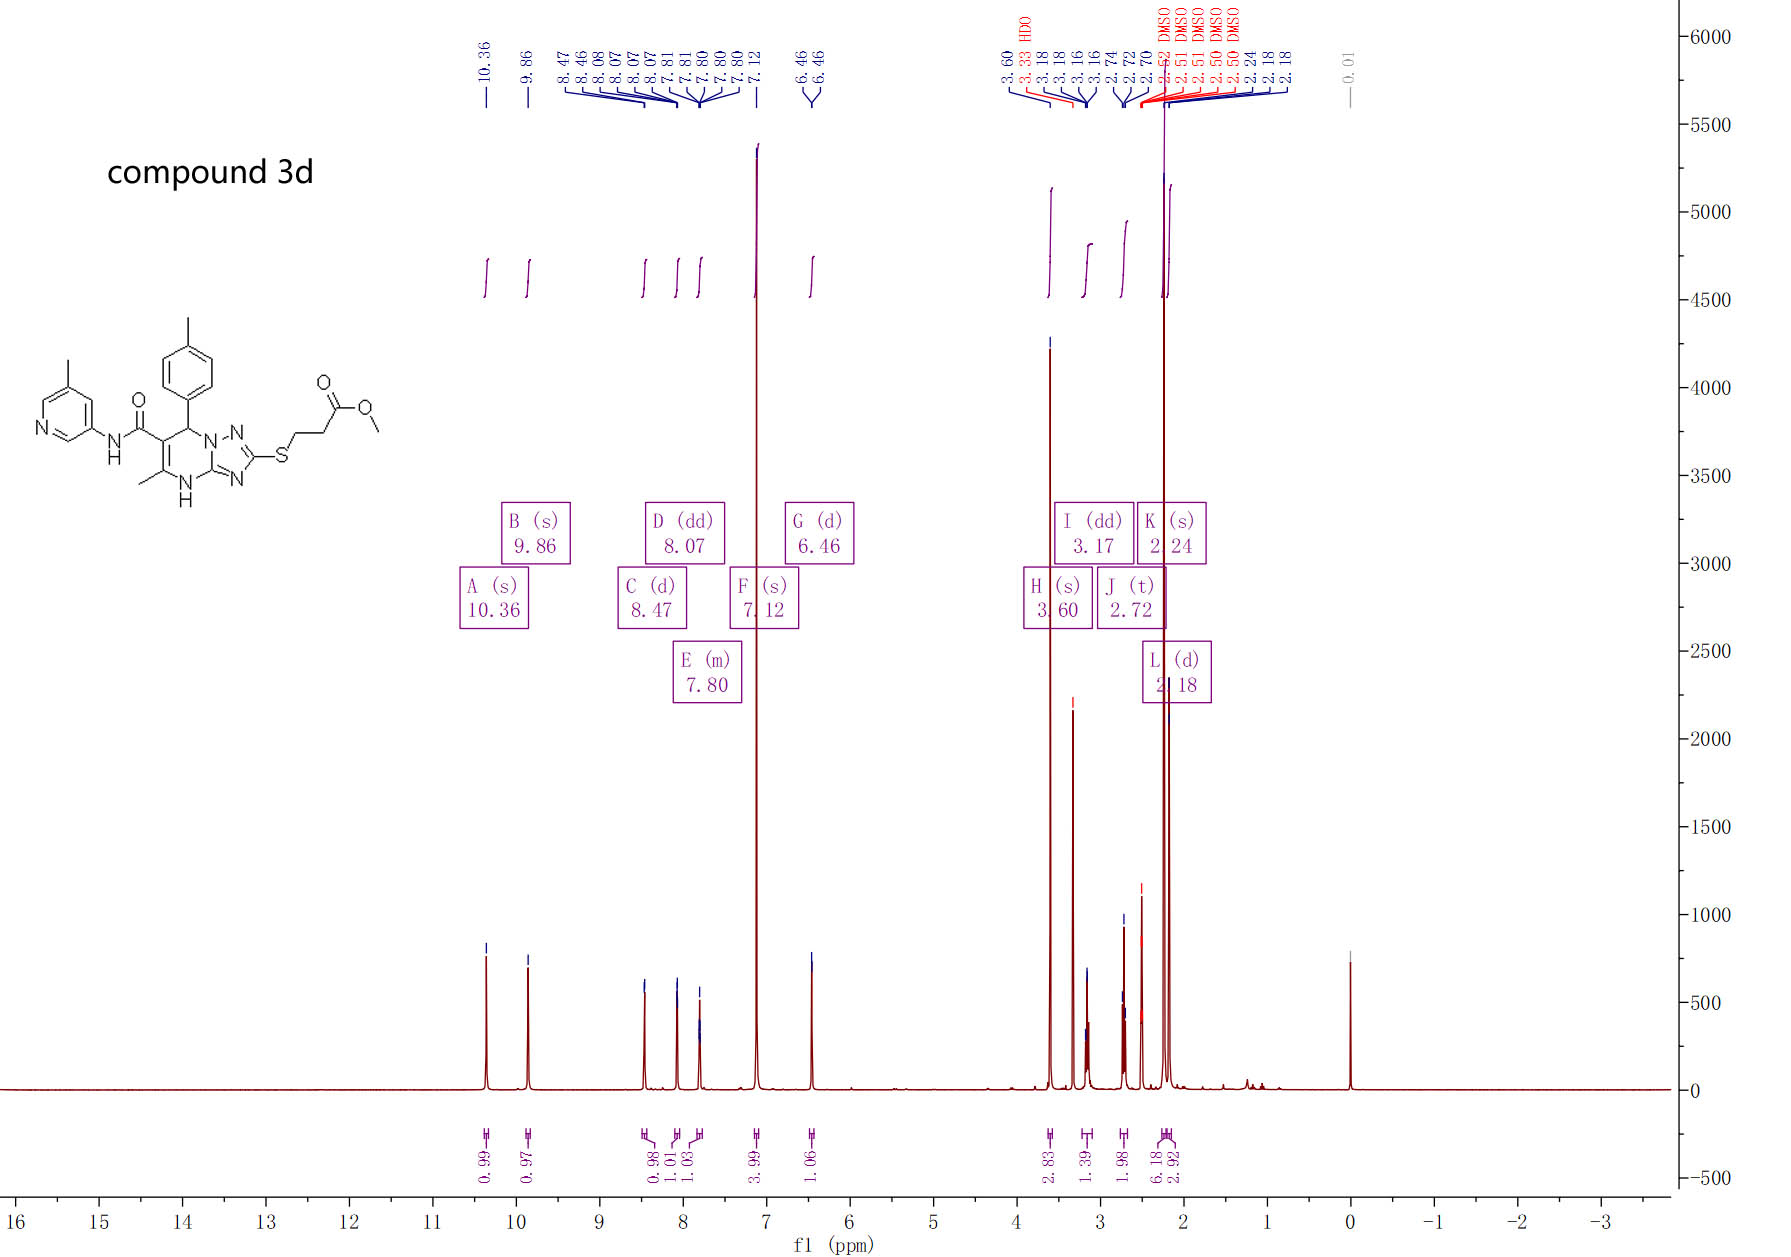


## 1H-NMR spectra of compound 3d


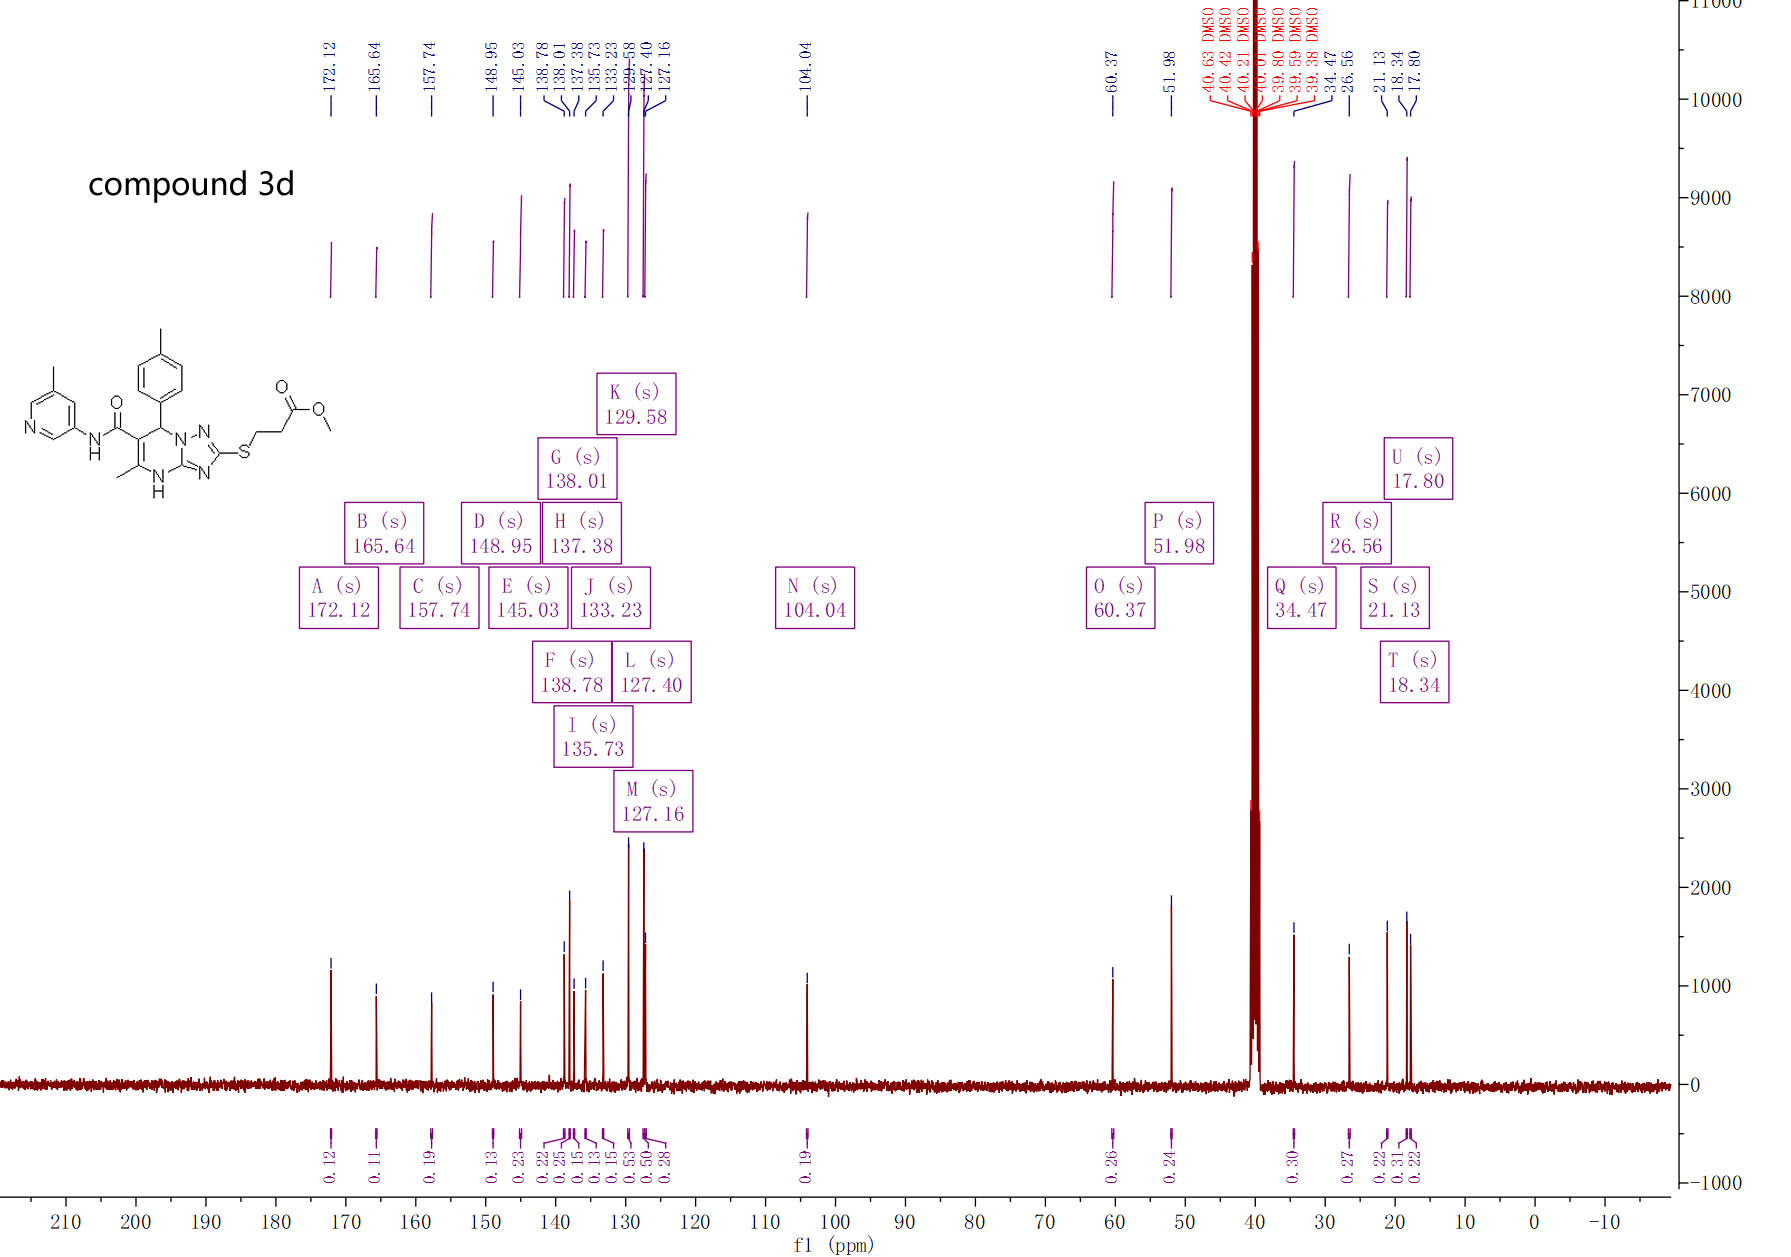


## 13C-NMR spectra of compound 3d


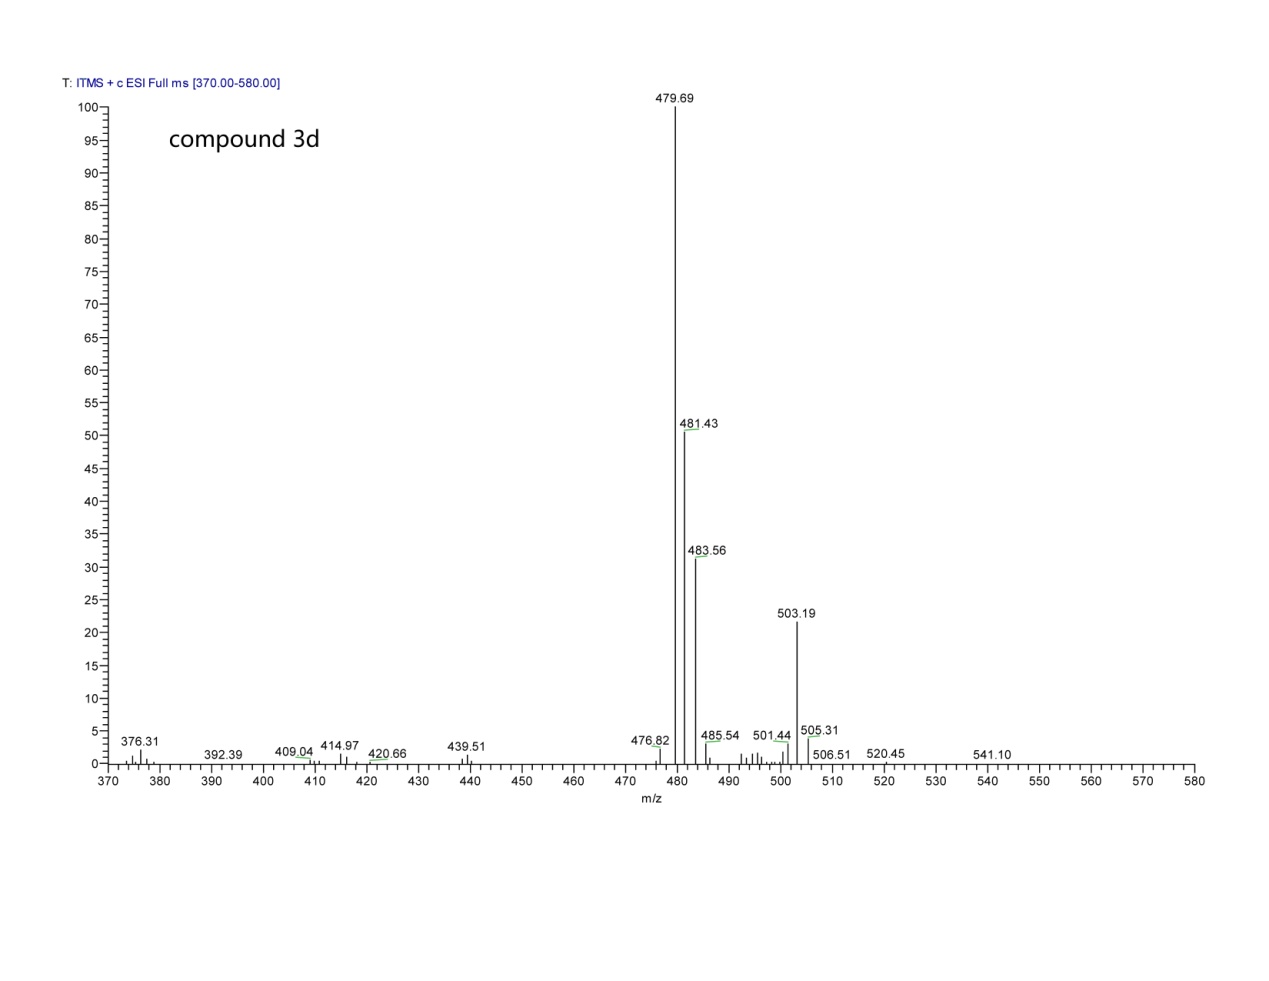


## MS spectra of compound 3d


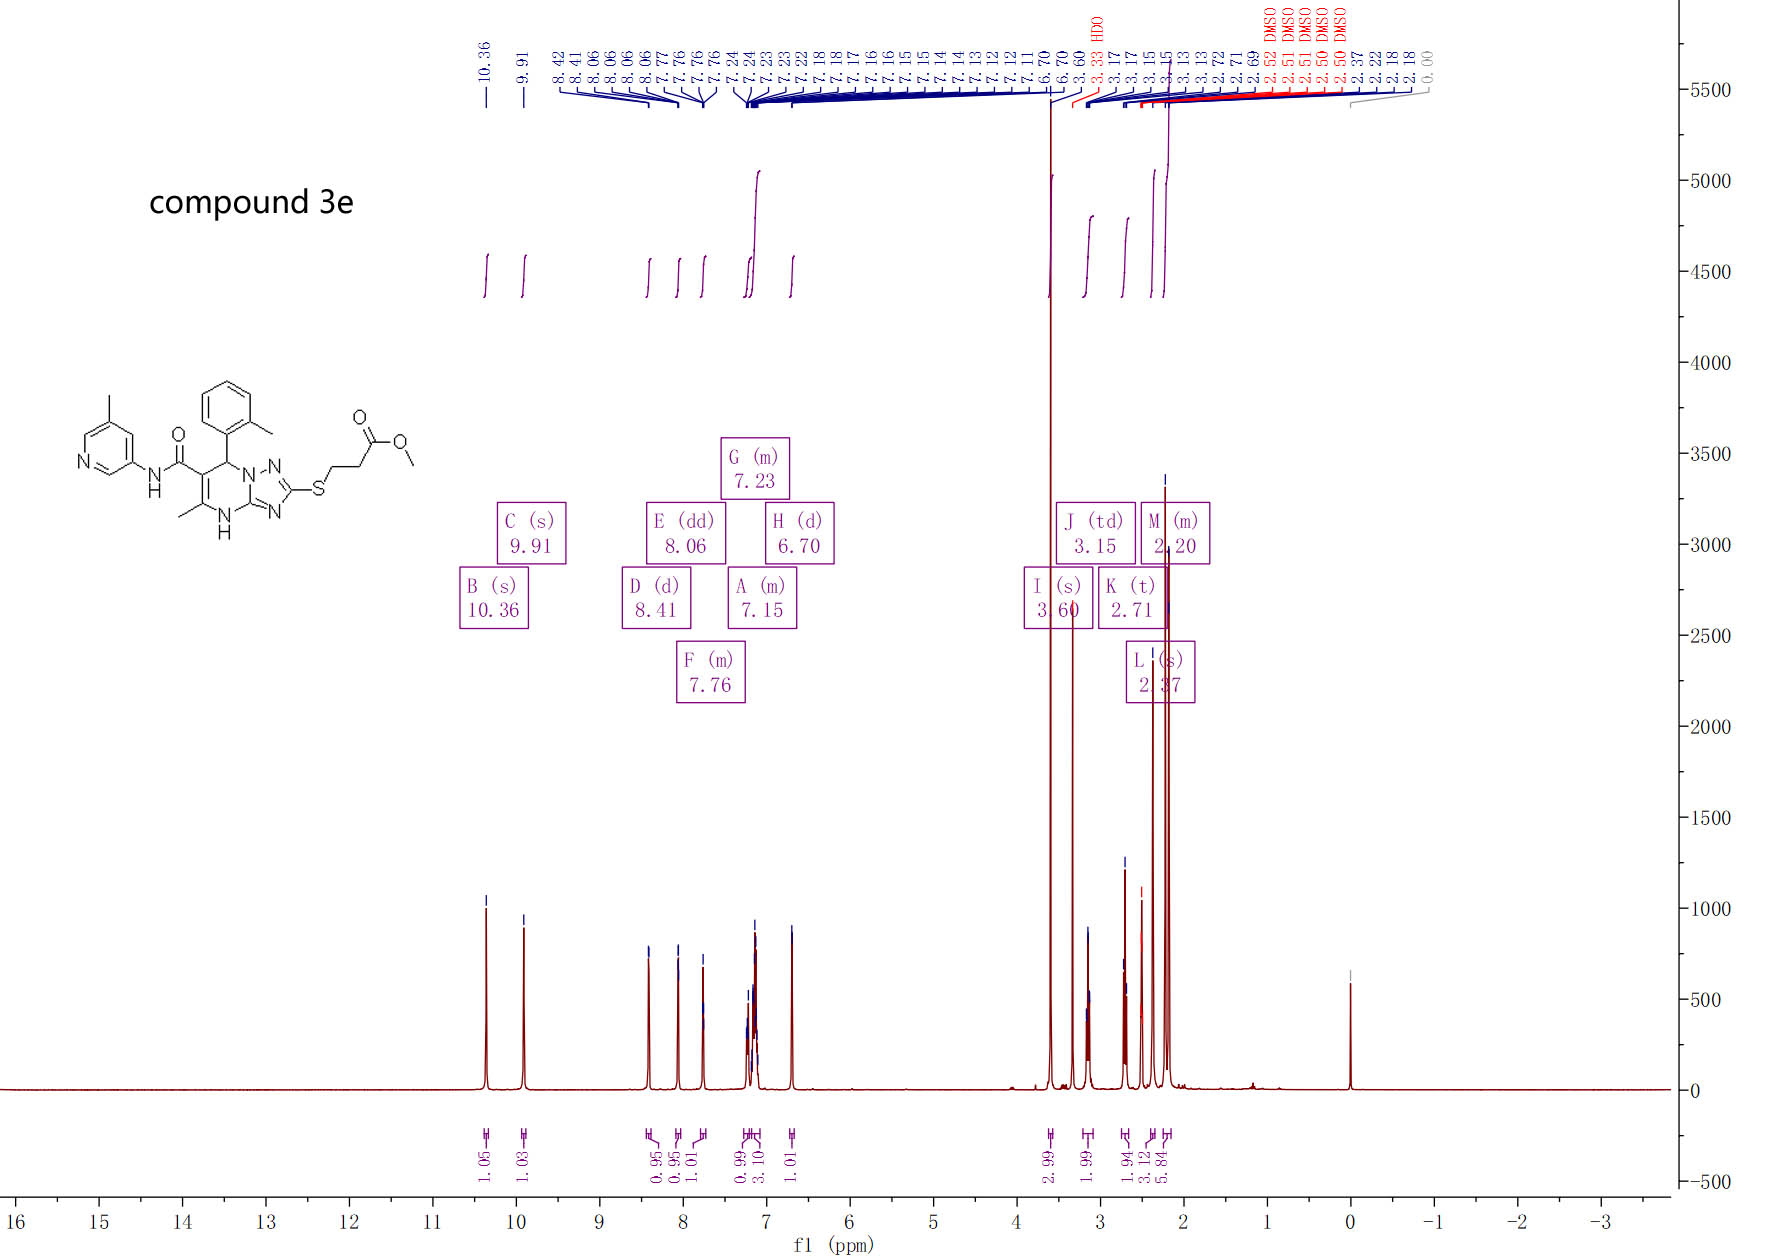


## 1H-NMR spectra of compound 3e


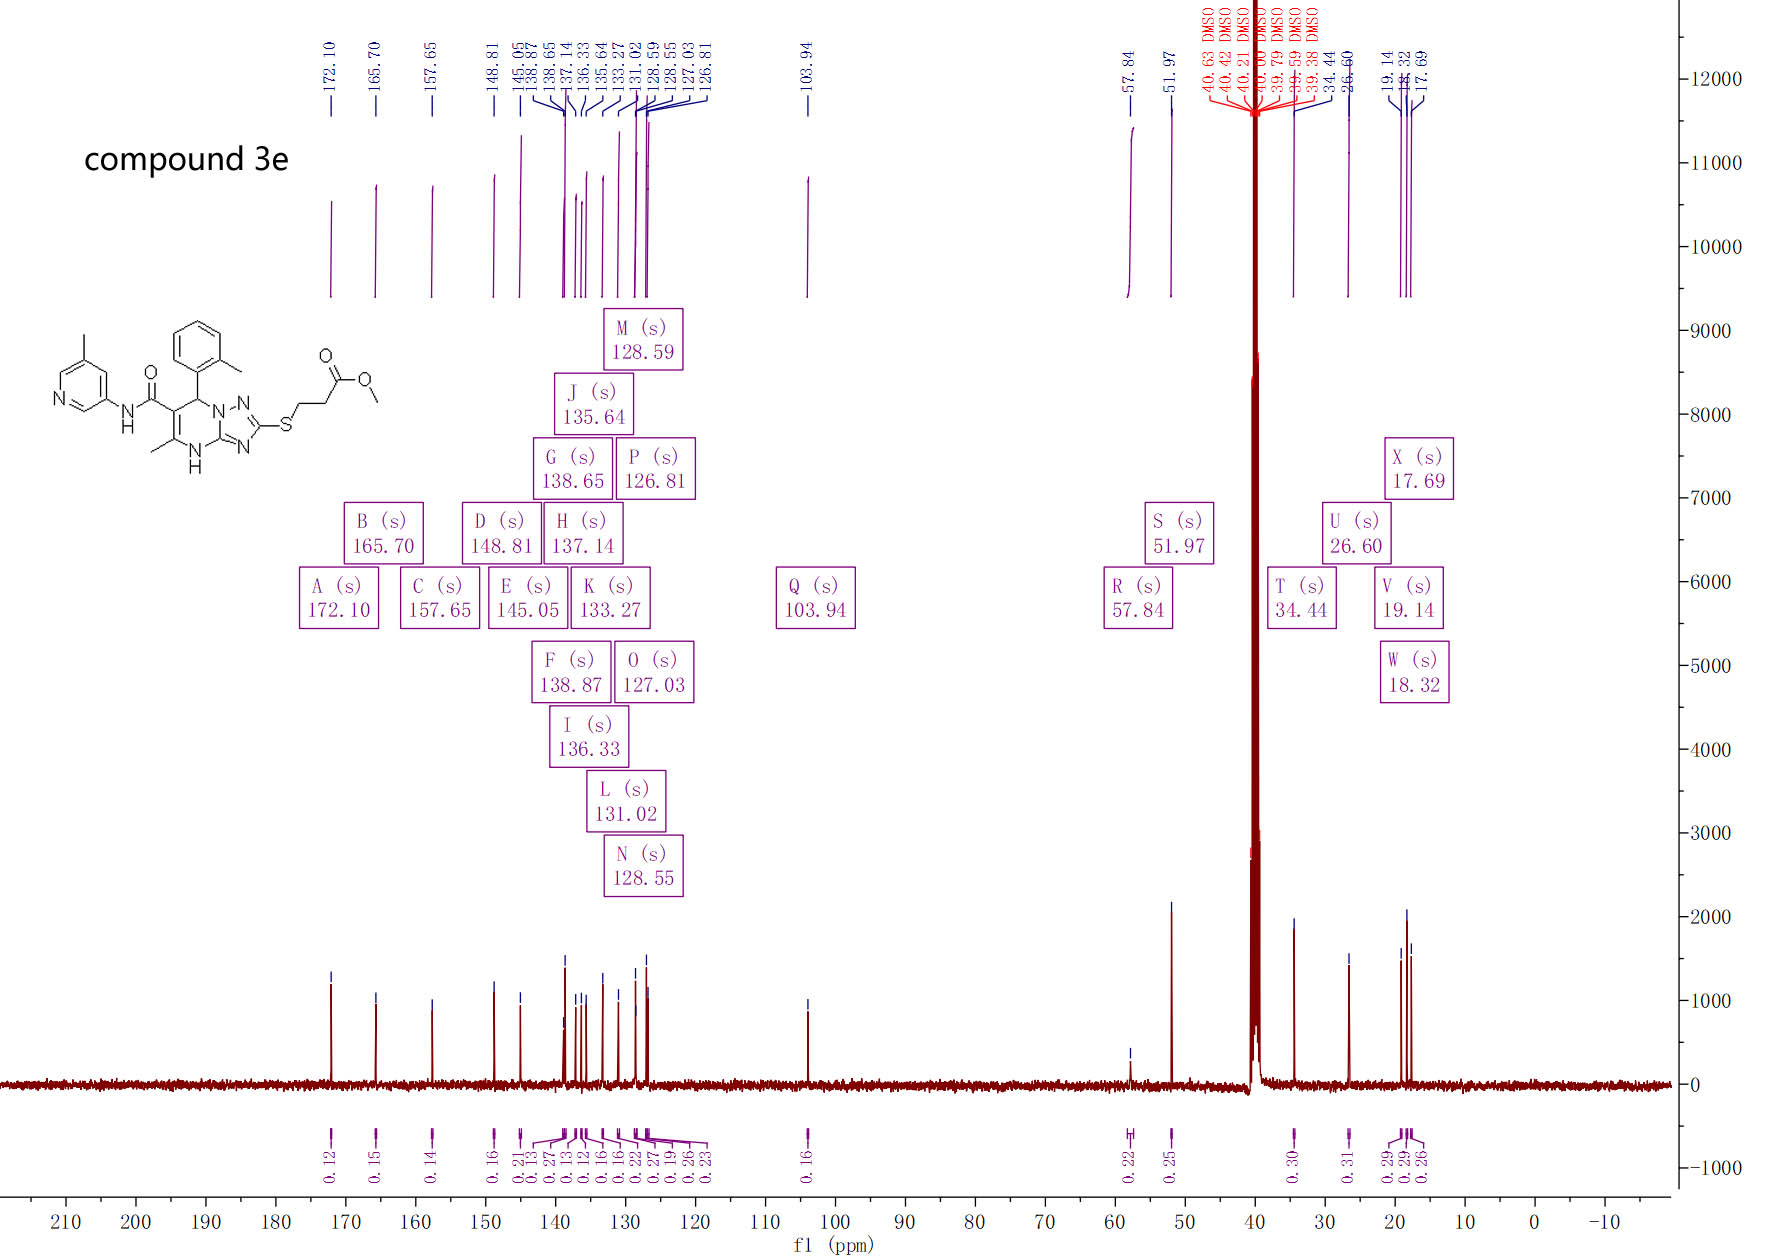


## 13C-NMR spectra of compound 3e


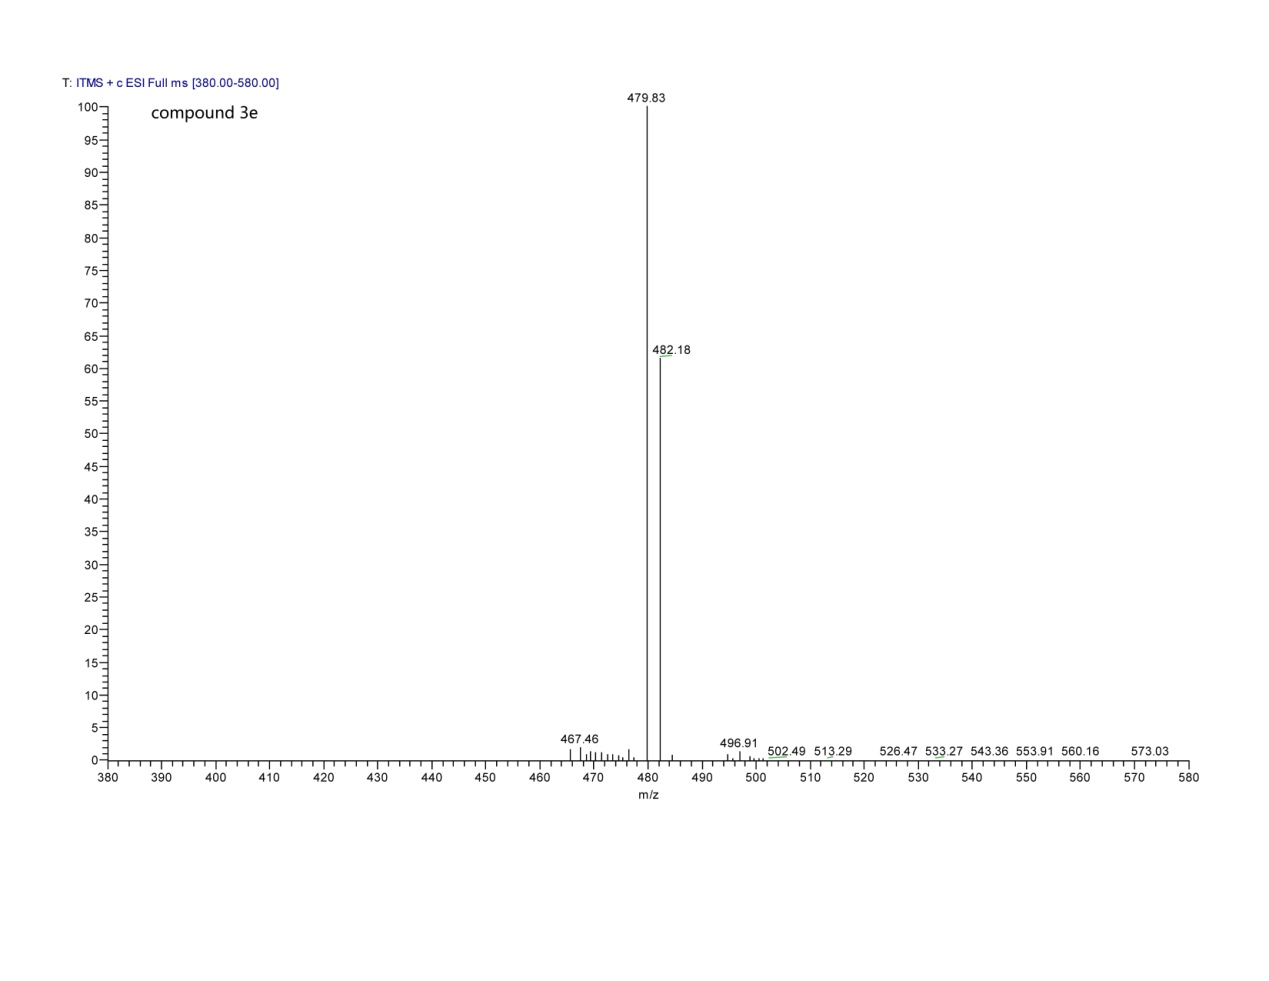


## MS spectra of compound 3e


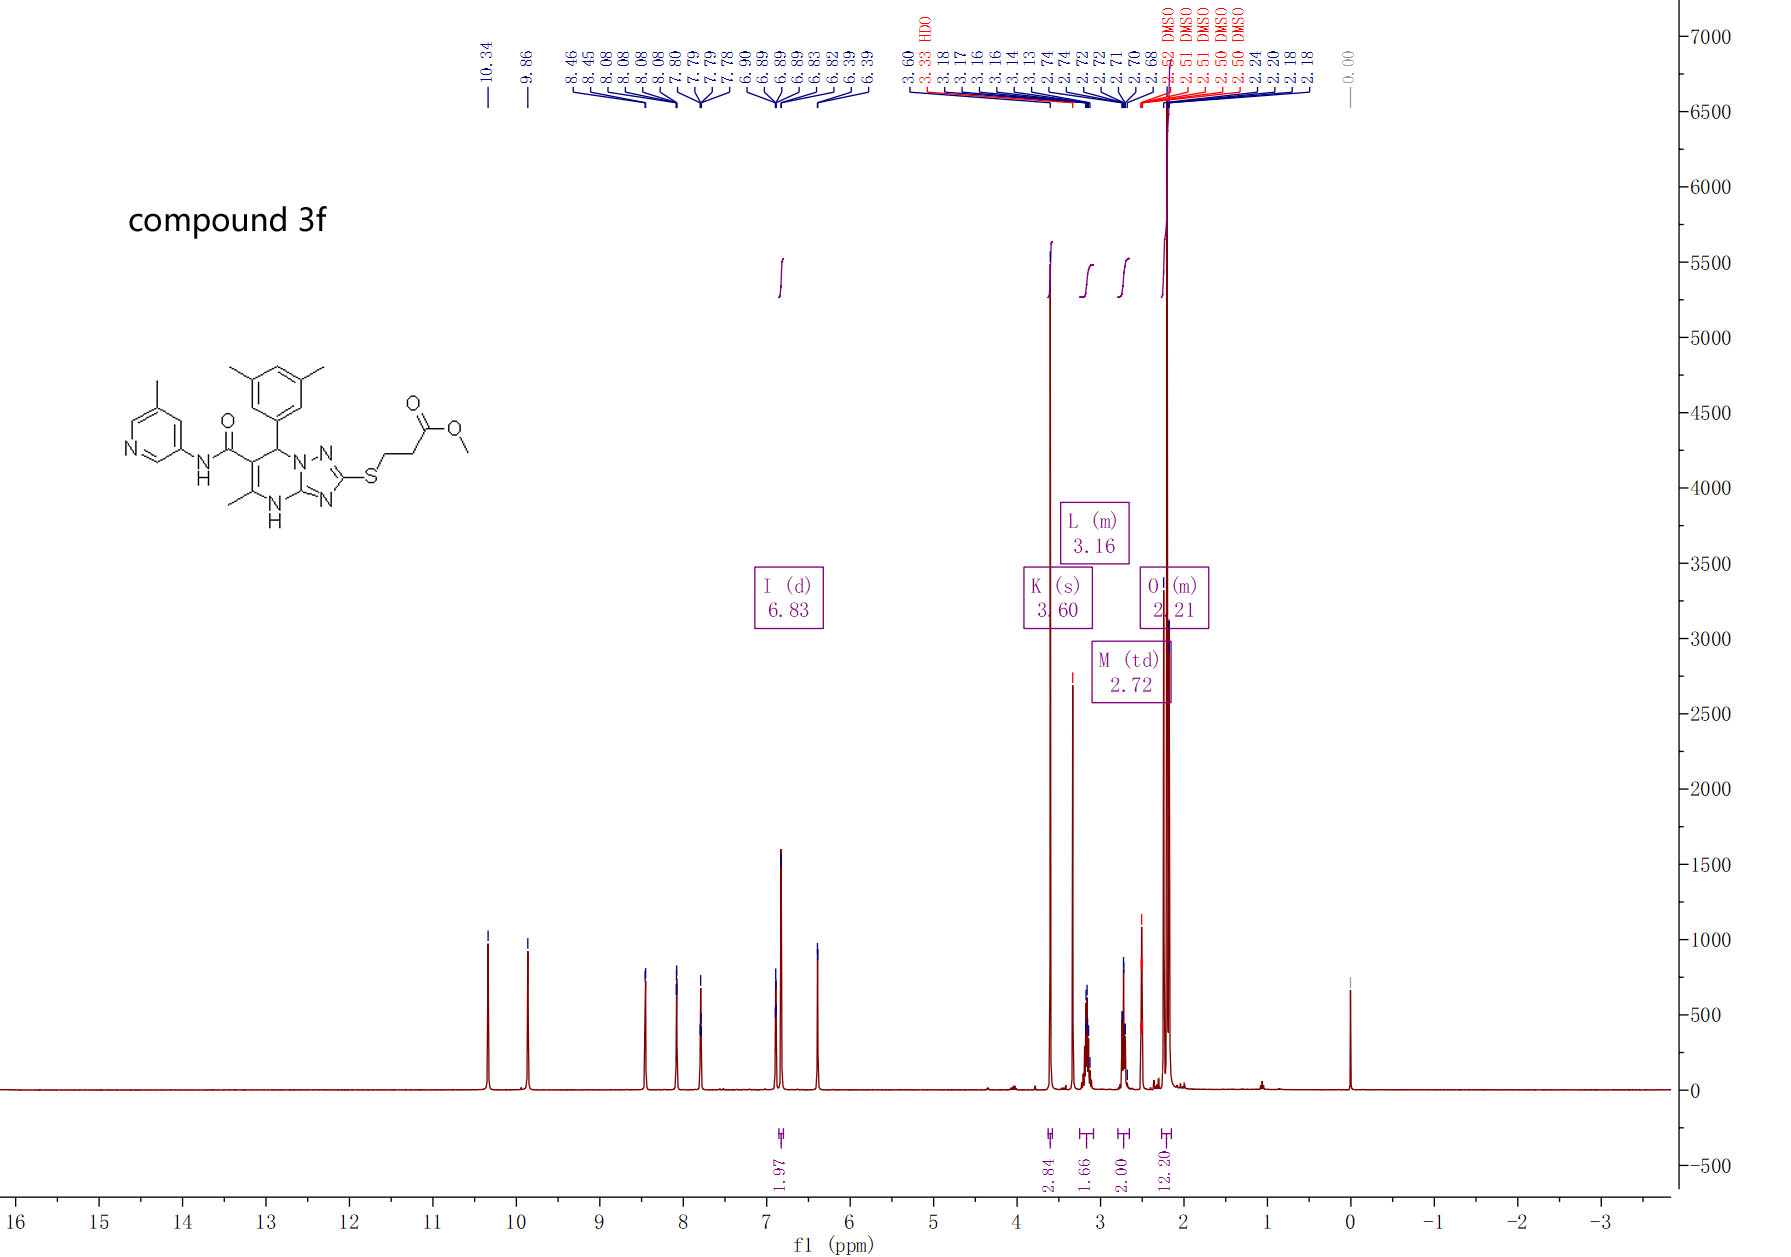


## 1H-NMR spectra of compound 3f


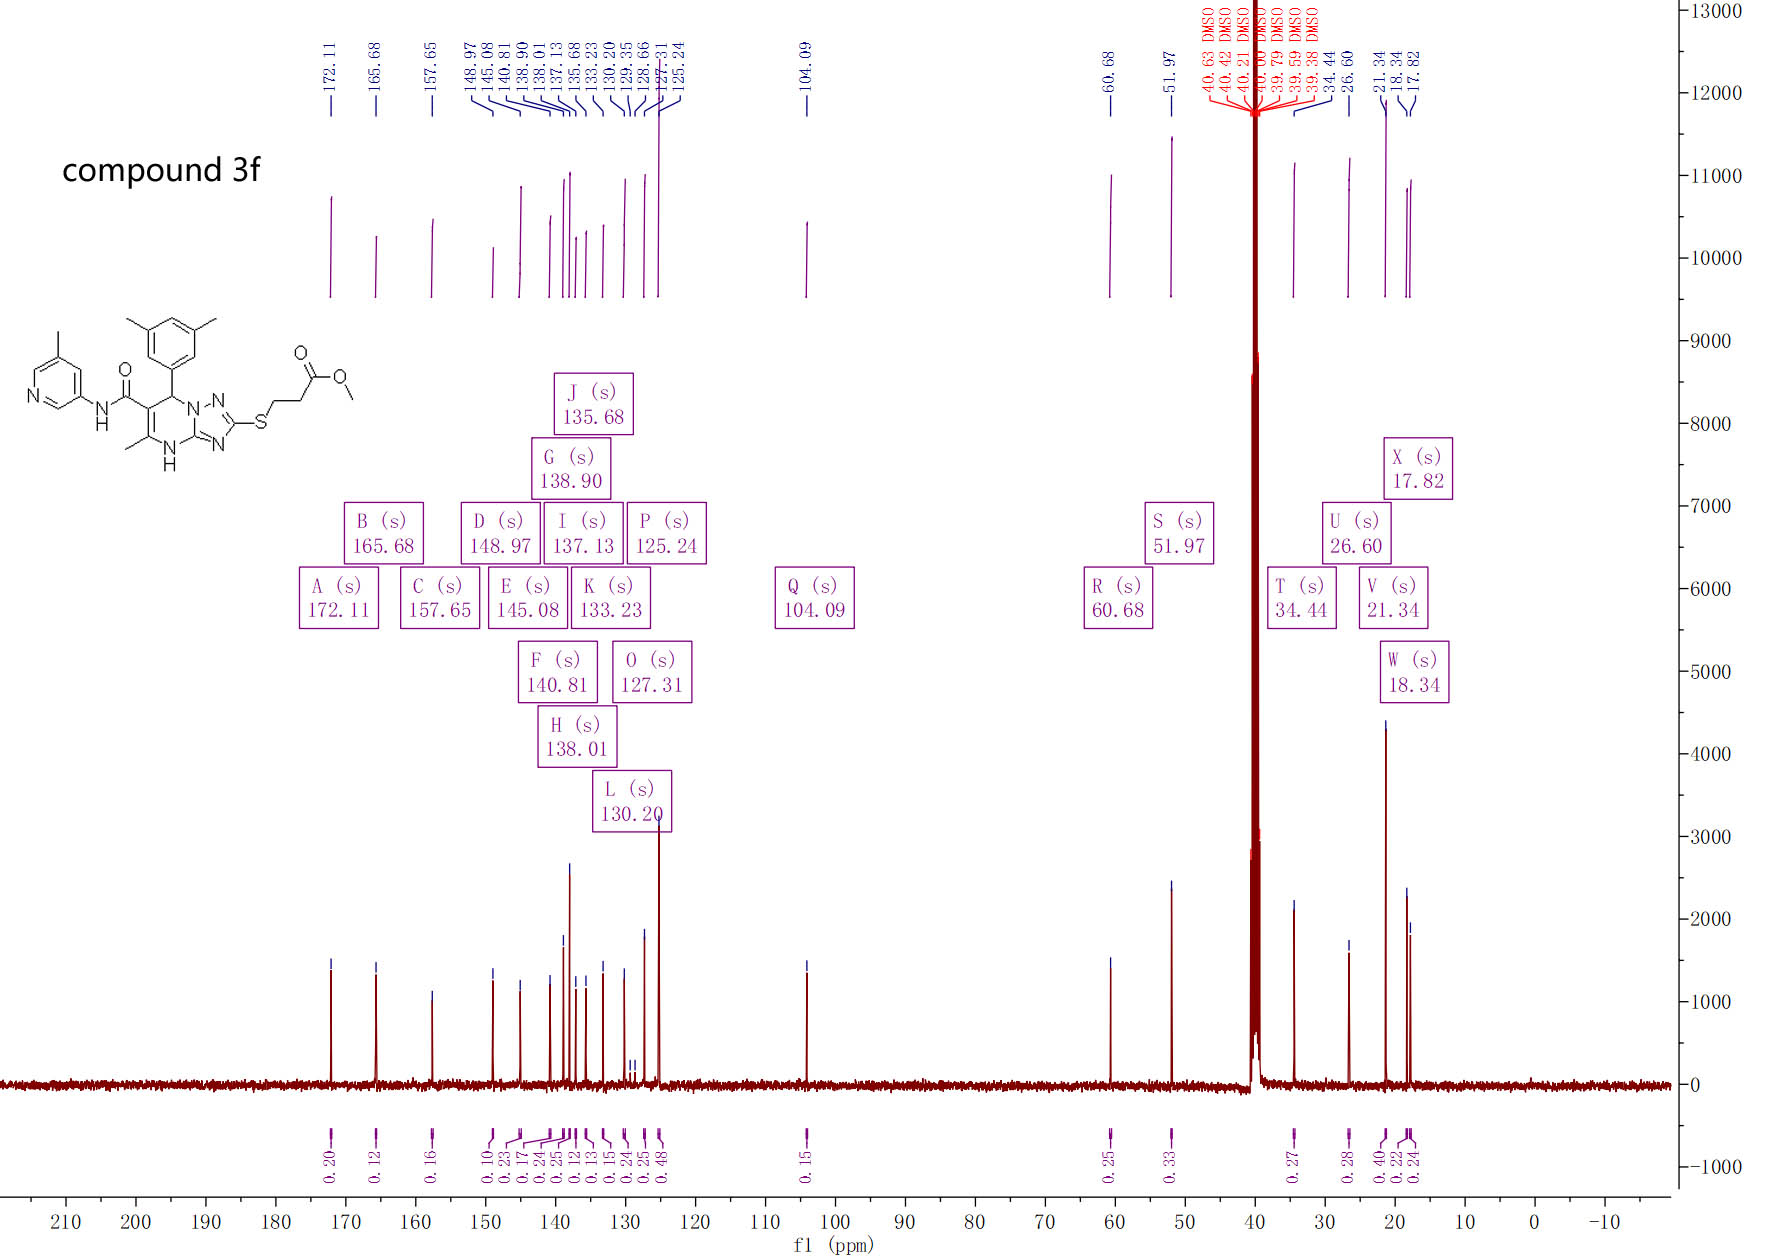


## 13C-NMR spectra of compound 3f


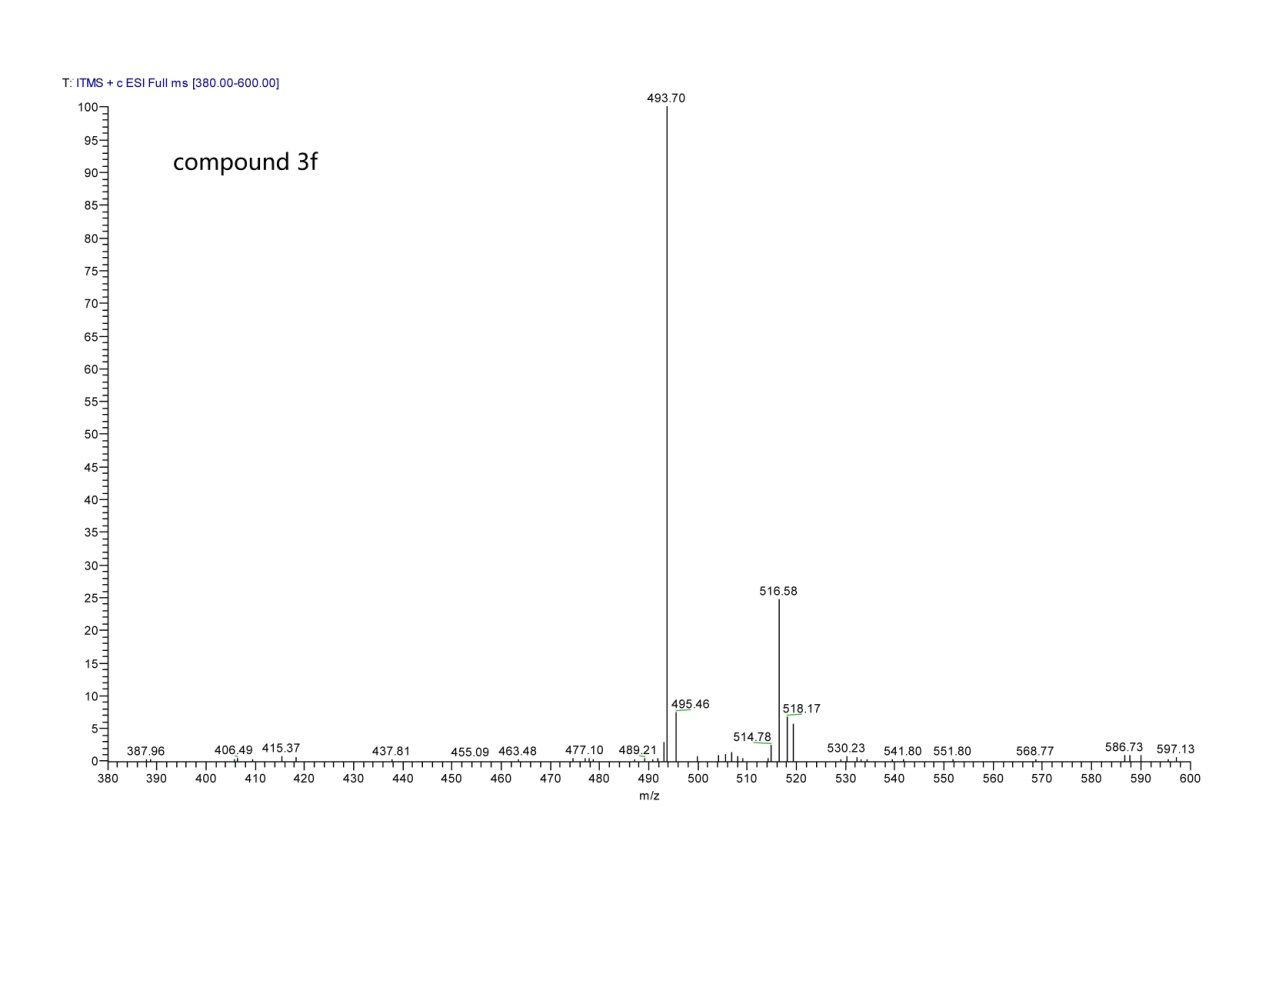


## MS spectra of compound 3f


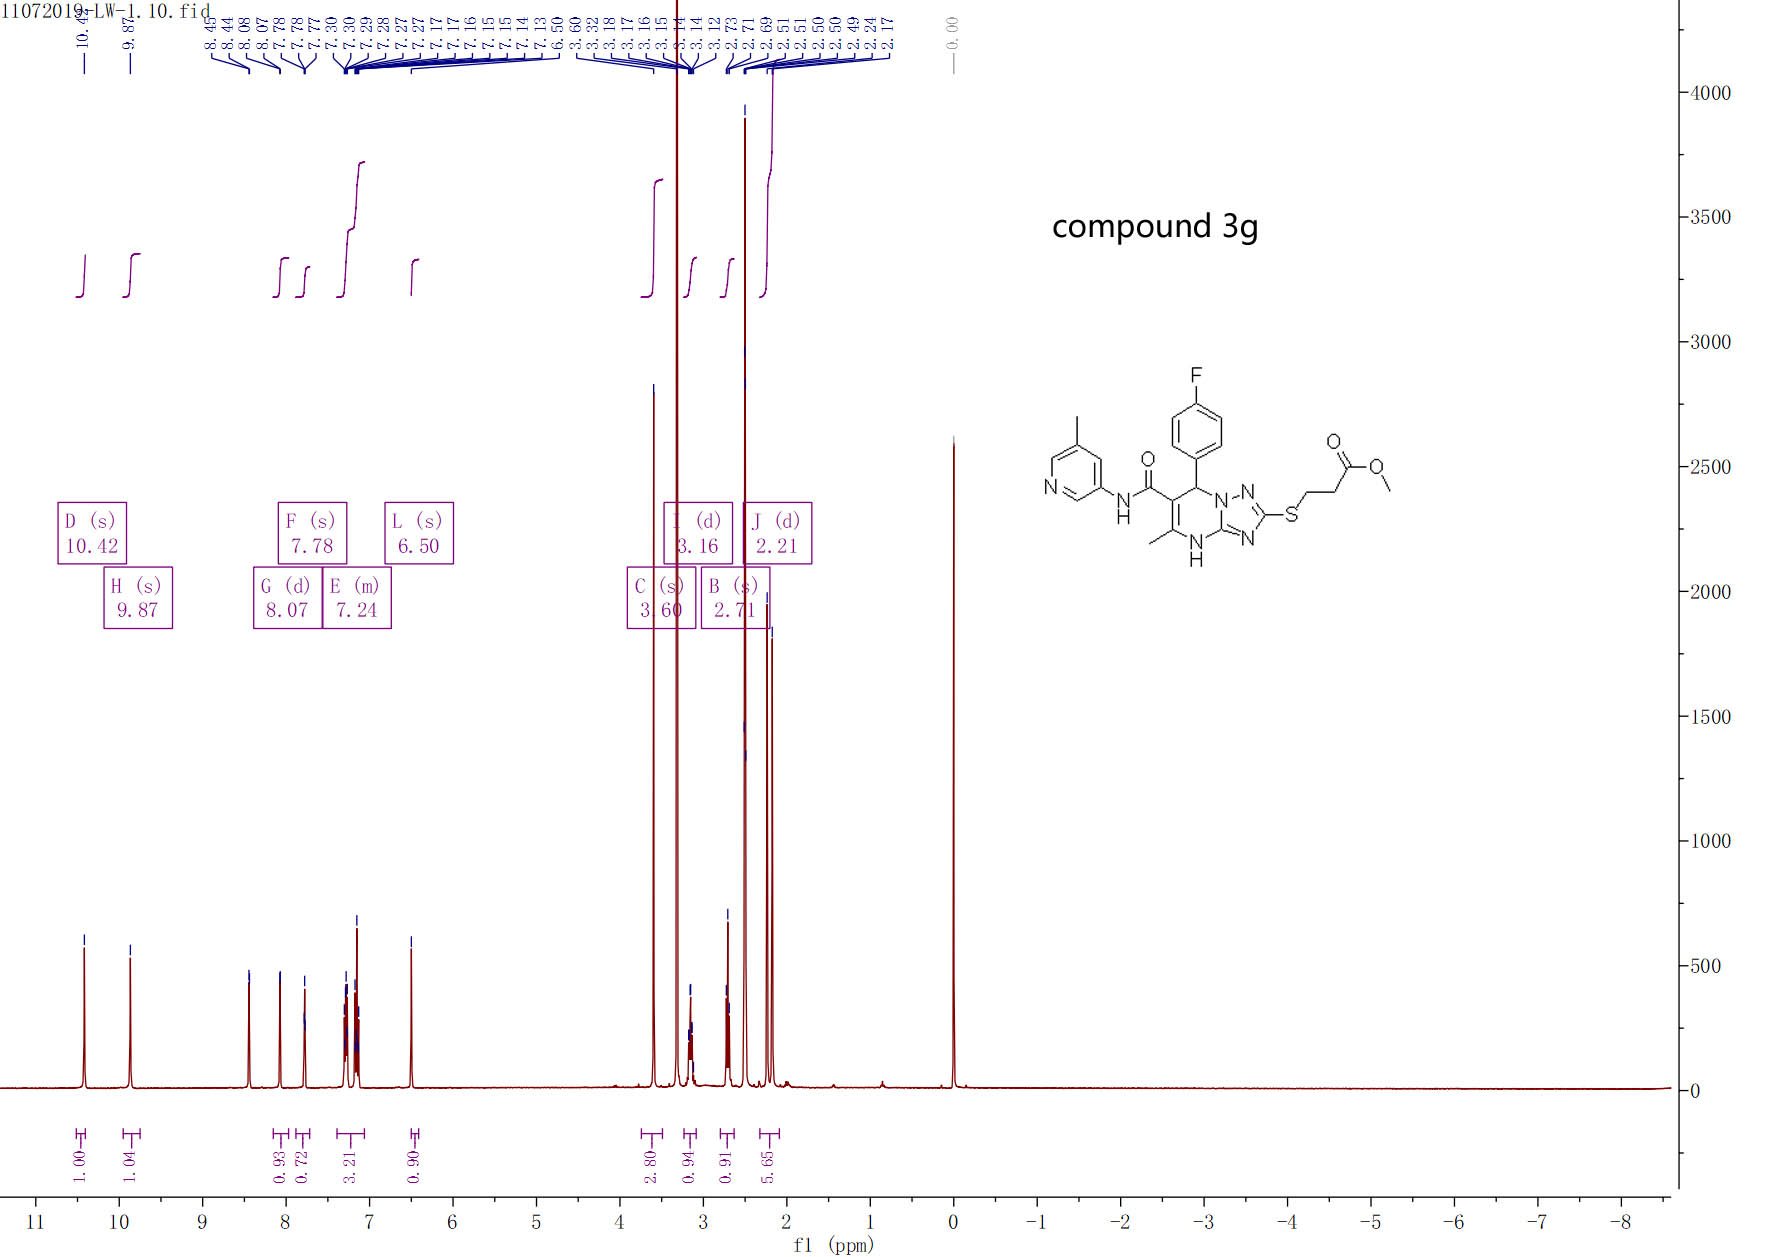


## 1H-NMR spectra of compound 3g


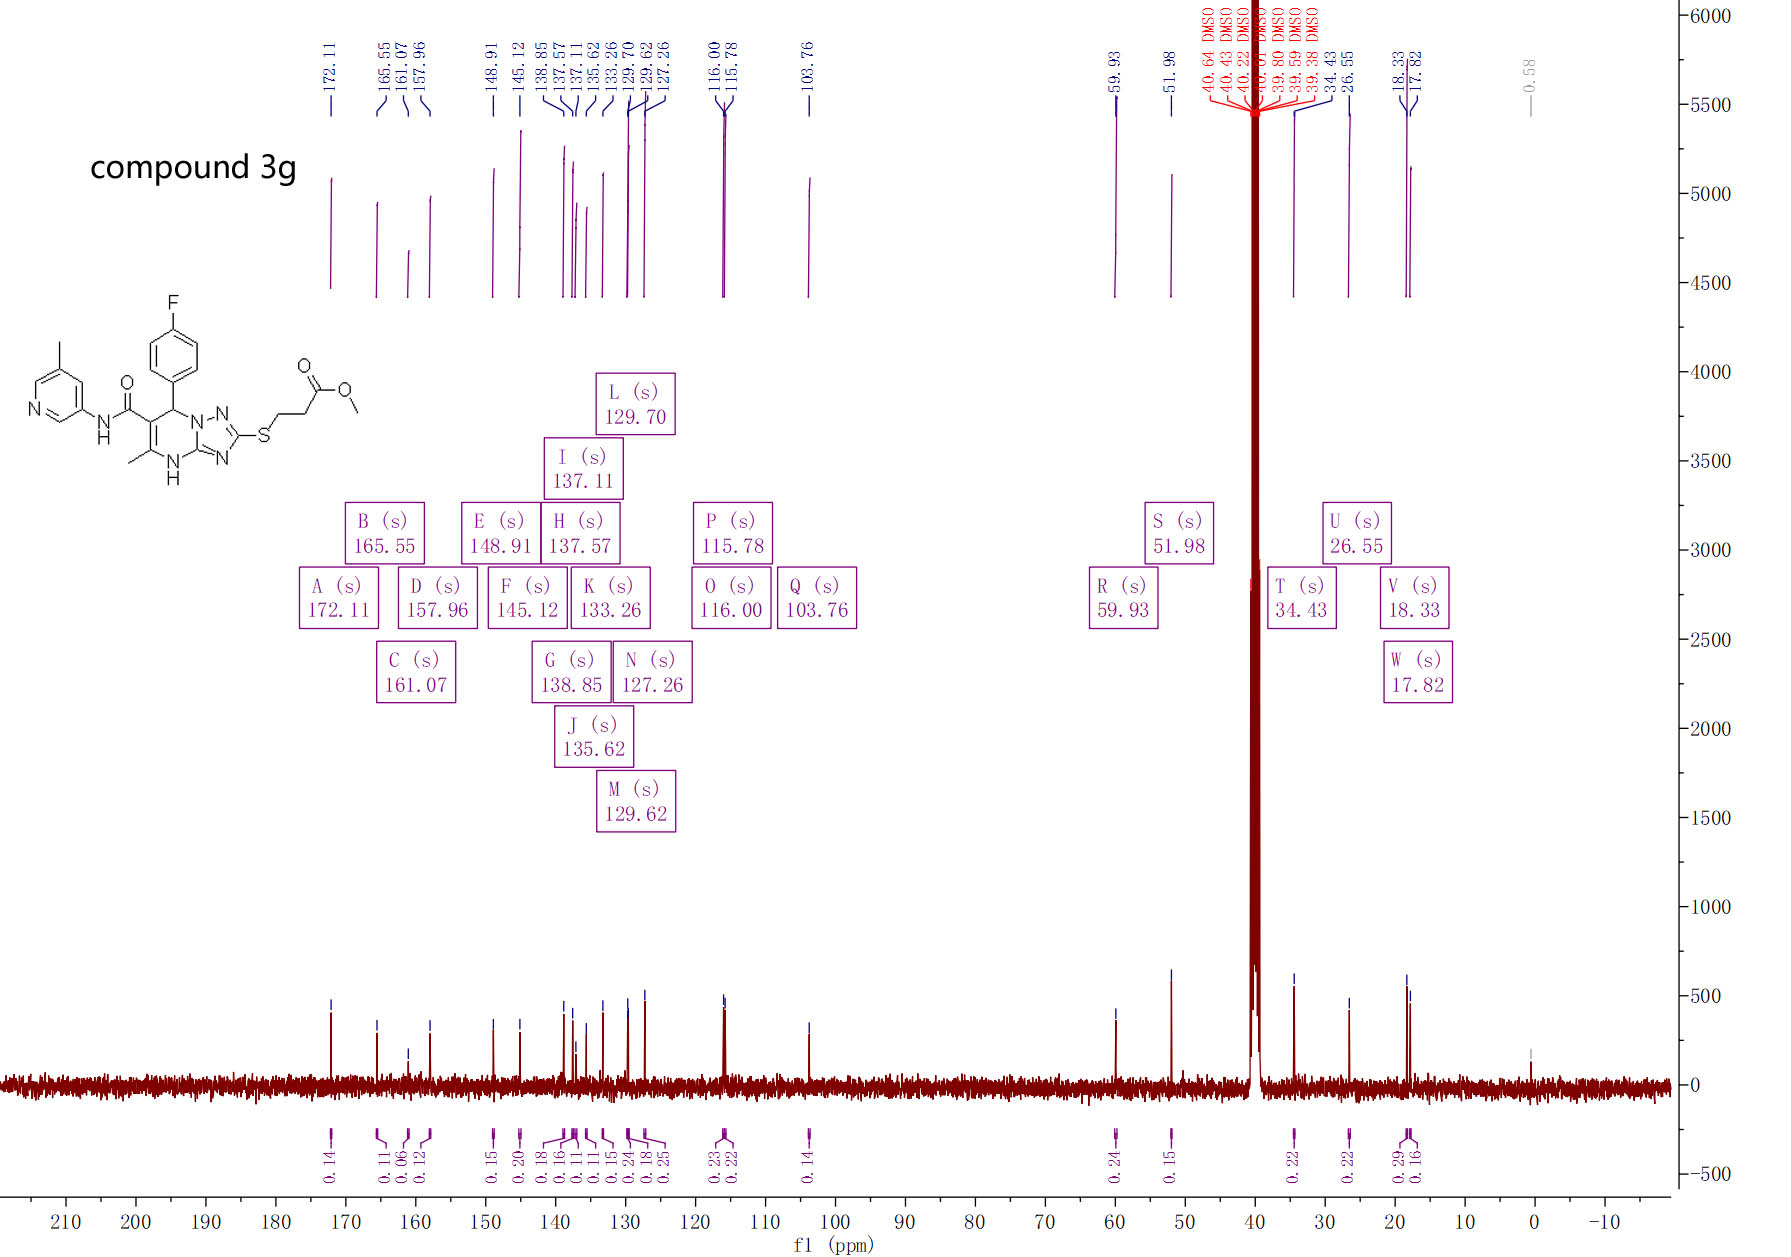


## 13C-NMR spectra of compound 3g


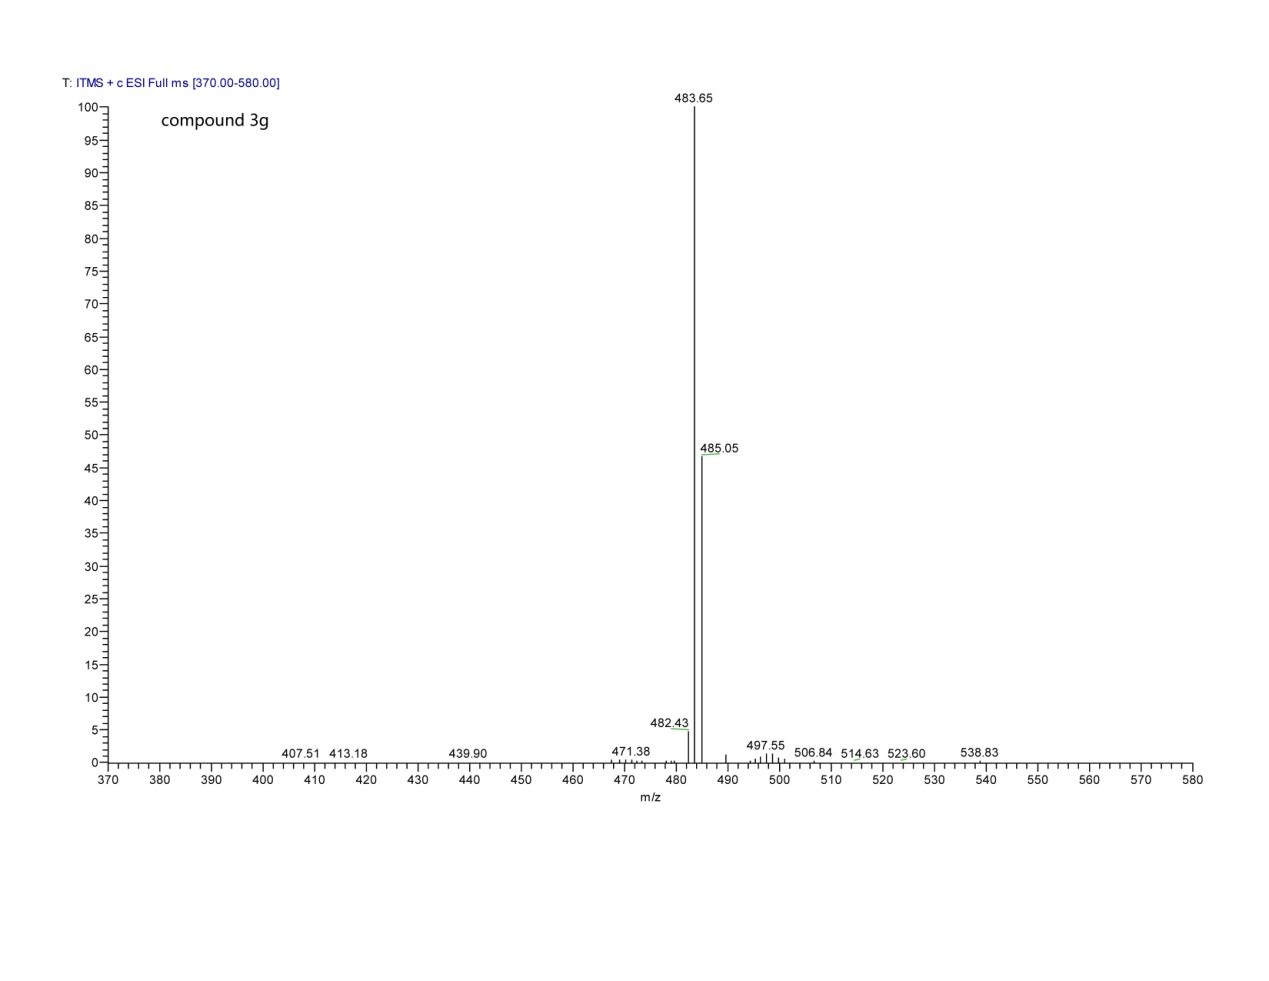


## MS spectra of compound 3g


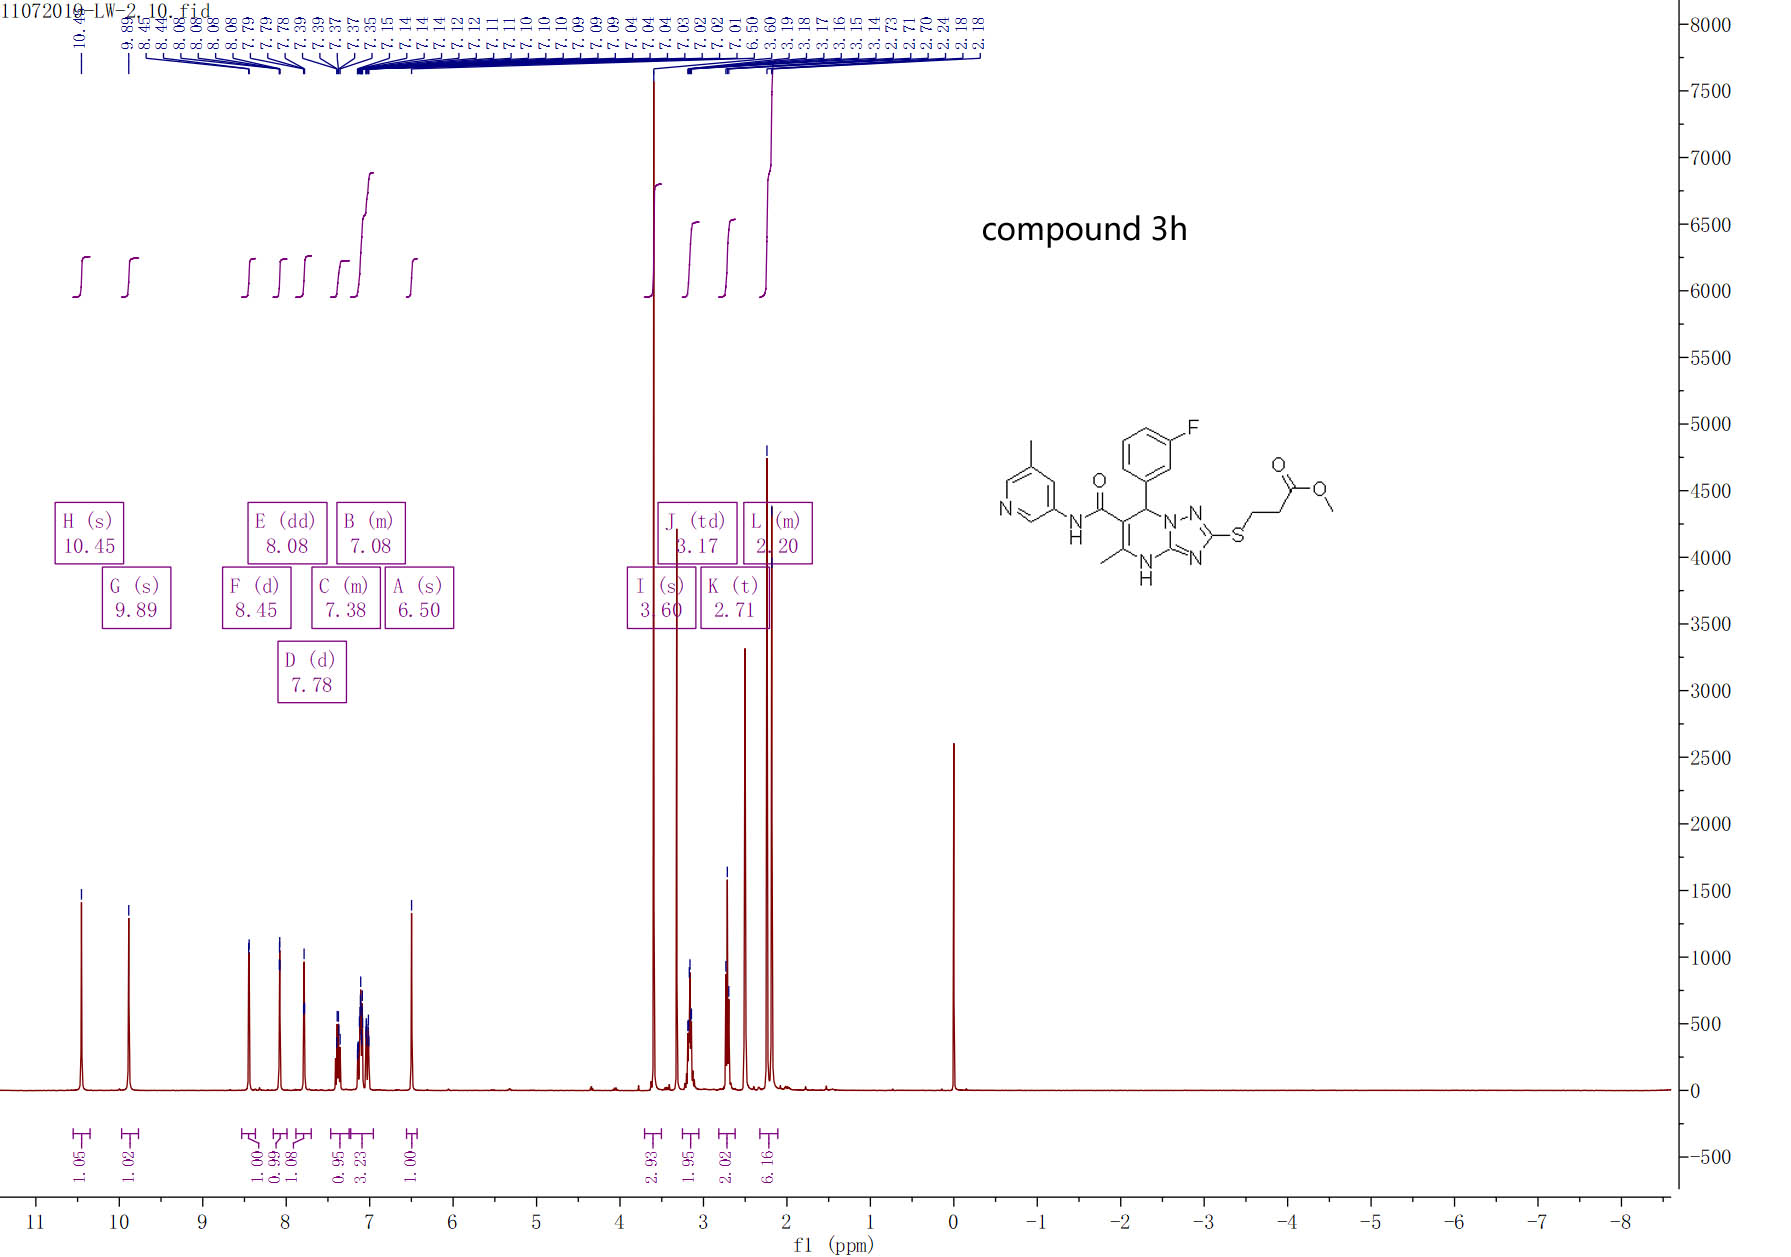


## 1H-NMR spectra of compound 3h


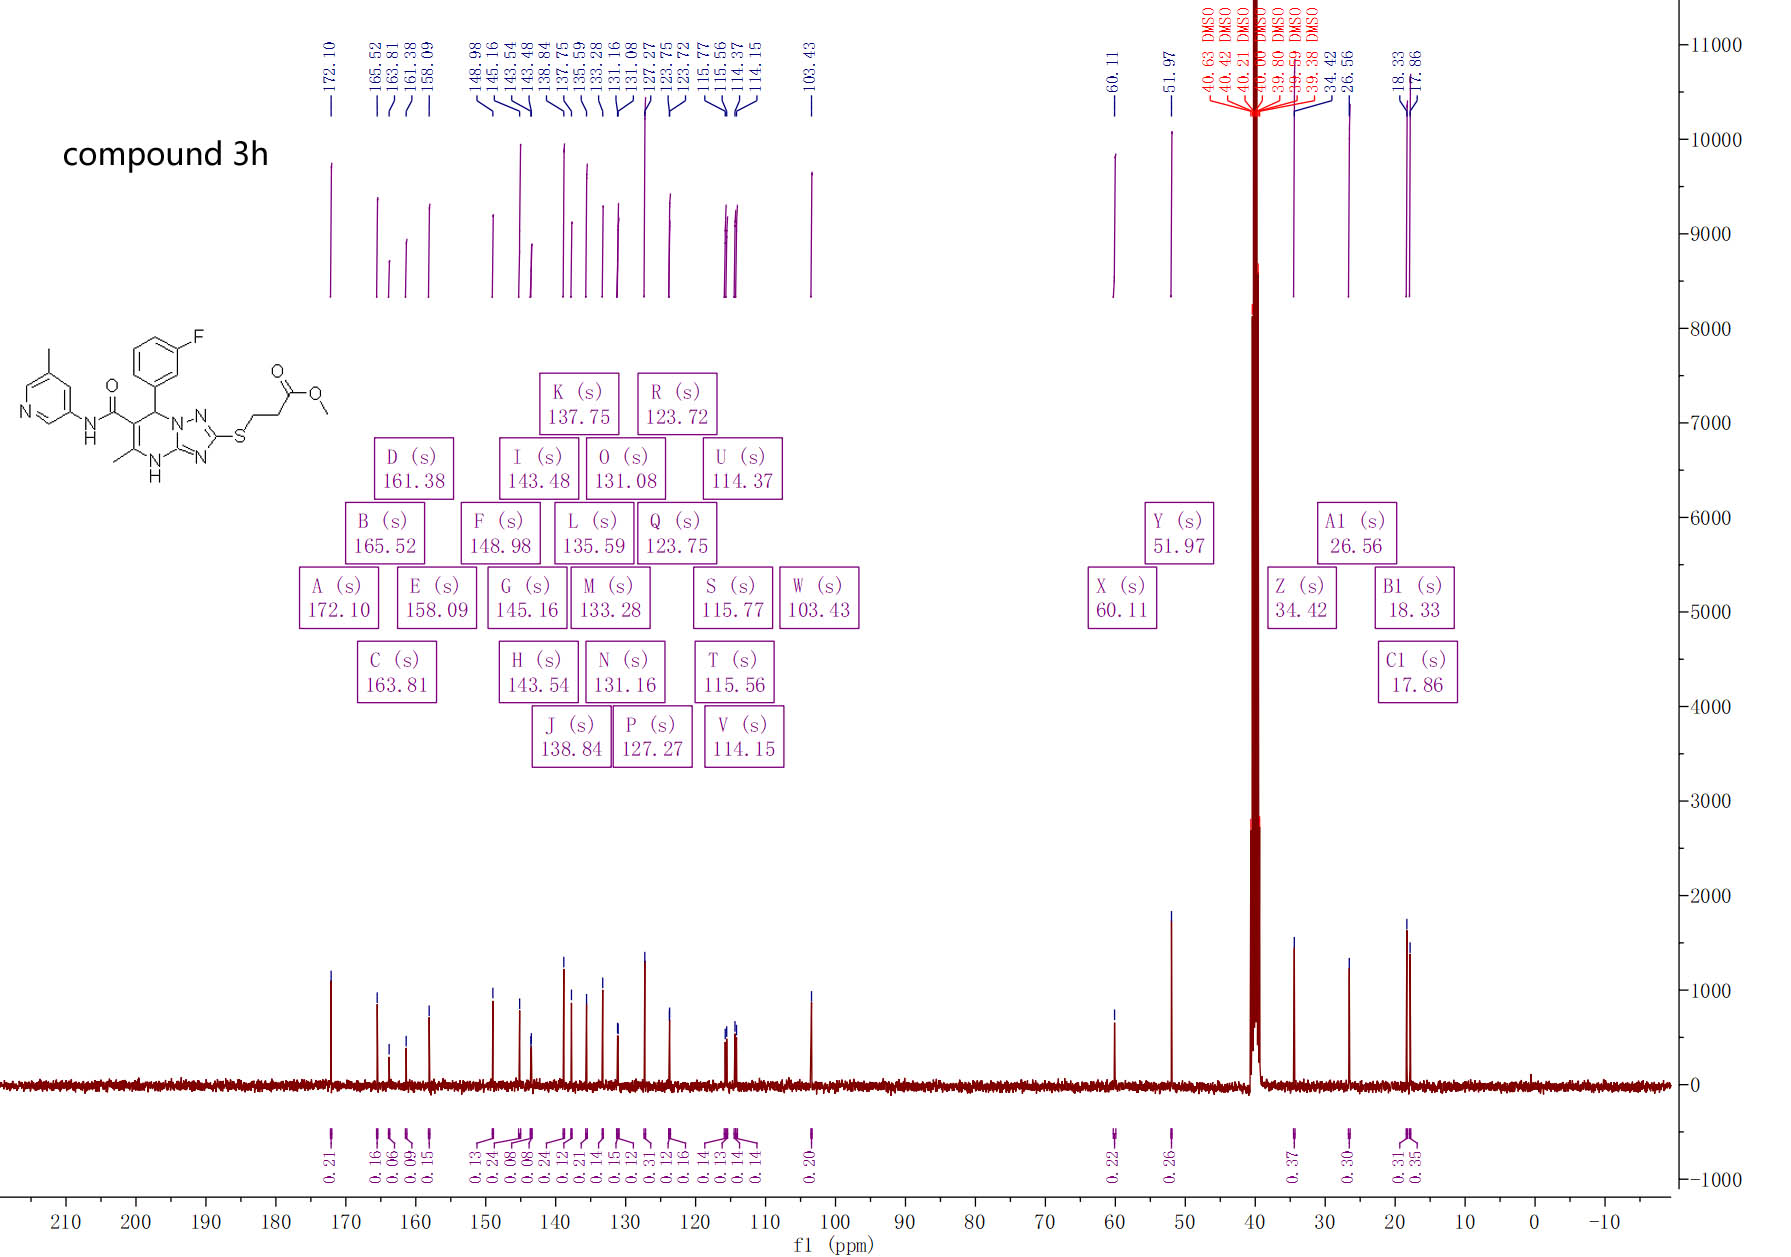


## 13C-NMR spectra of compound 3h


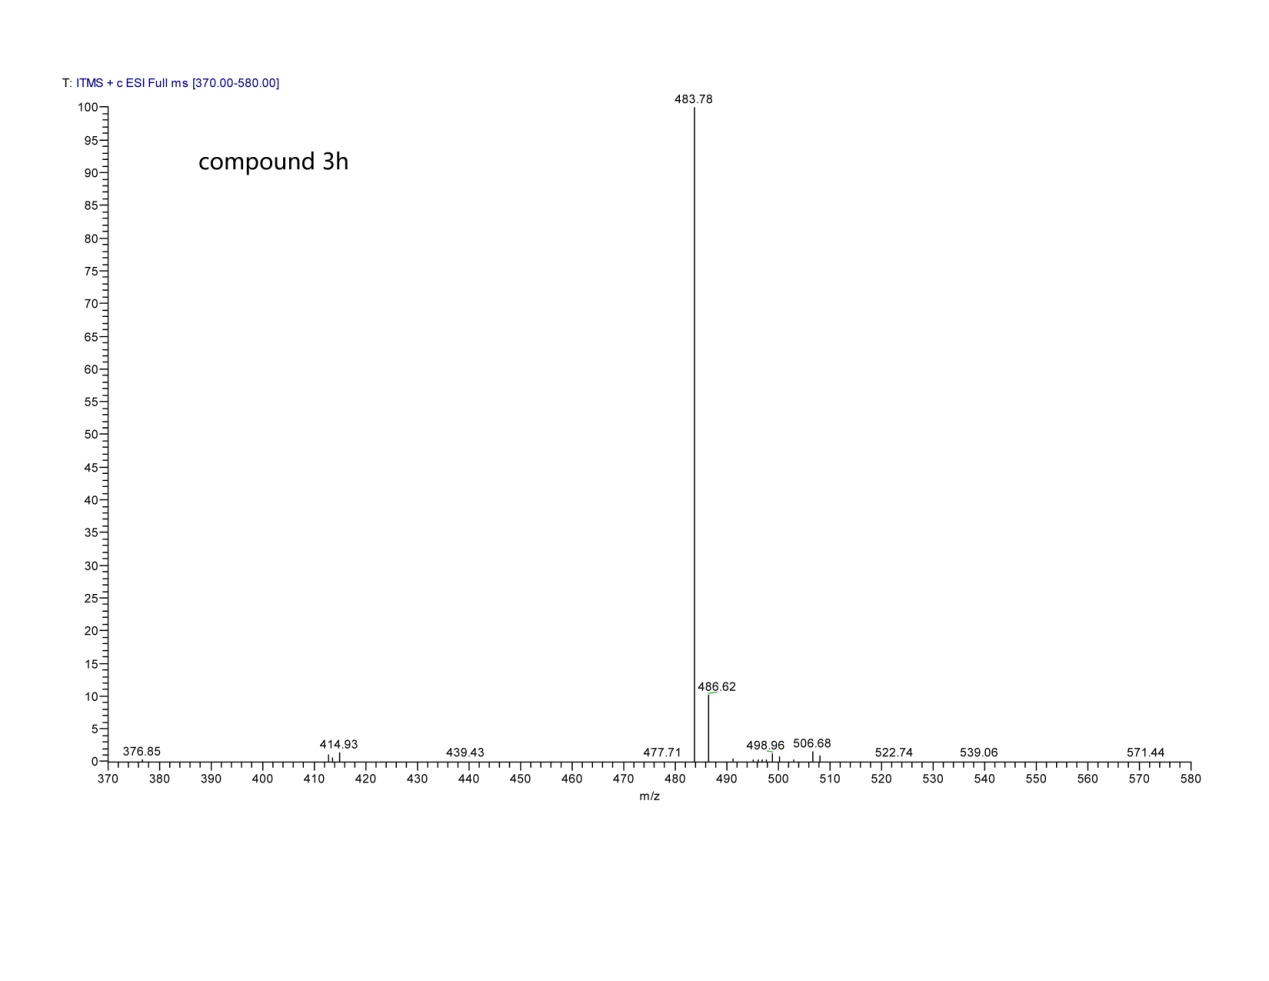


## MS spectra of compound 3h
